# Supplementary material for: Reliable Gas-Phase Tautomer Equilibria of Drug-like Molecule Scaffolds and the Issue of Continuum Solvation
Source: Research Square preprint supplement (doi:10.21203/rs.3.rs-1505283/v1), 2022-04-05
Supplement: Supplementary file 1 [file 624e0747f17be1e67cc17965.docx]

Supporting Information

Reliable Gas-Phase Tautomer Equilibria of Drug-like Molecule Scaffolds and the Issue of Continuum Solvation

Andreas H. Göller

Bayer AG, Computational Molecular Design, Aprather Weg 18a, 42096 Wuppertal, [andreas.goeller@bayer.com](mailto:andreas.goeller@bayer.com)

Figure S1: DFT / Water energy plots

Figure S2: DFT / gas energy plots

Figure S3: DFT / Water delta histograms

Figure S4: DFT / gas delta histograms

Figure S5: cheap / Water energy plots

Figure S6: cheap / gas energy plots

Figure S7: cheap / Water delta histograms

Figure S8: cheap / gas delta histograms

Table T1: water tautomer energies and deltas

Table T2: gas-phase tautomer energies and deltas


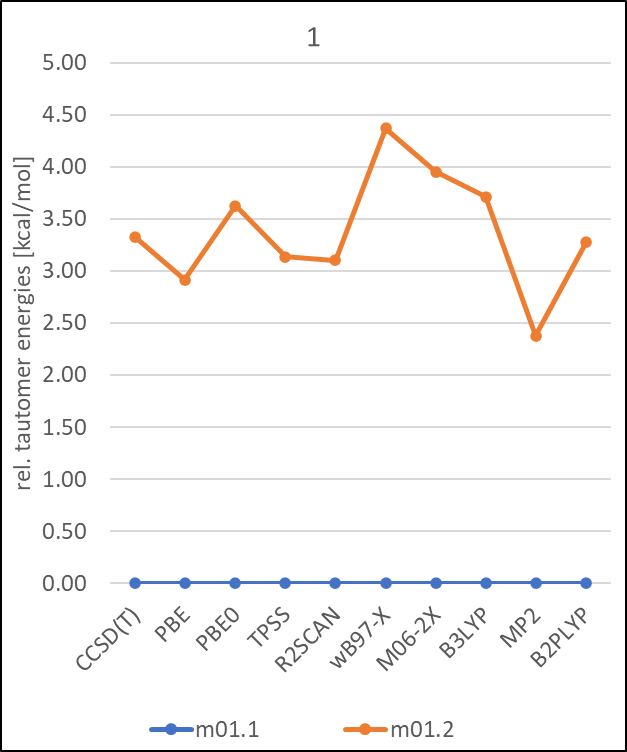

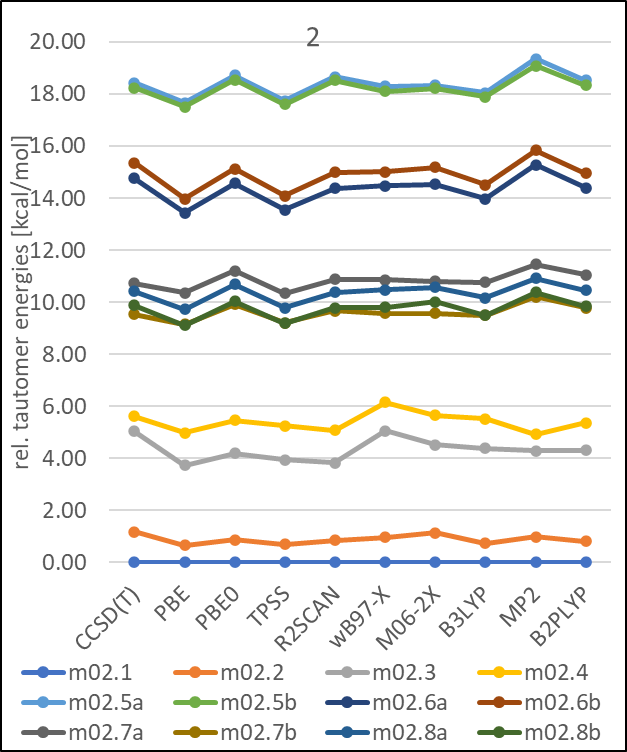

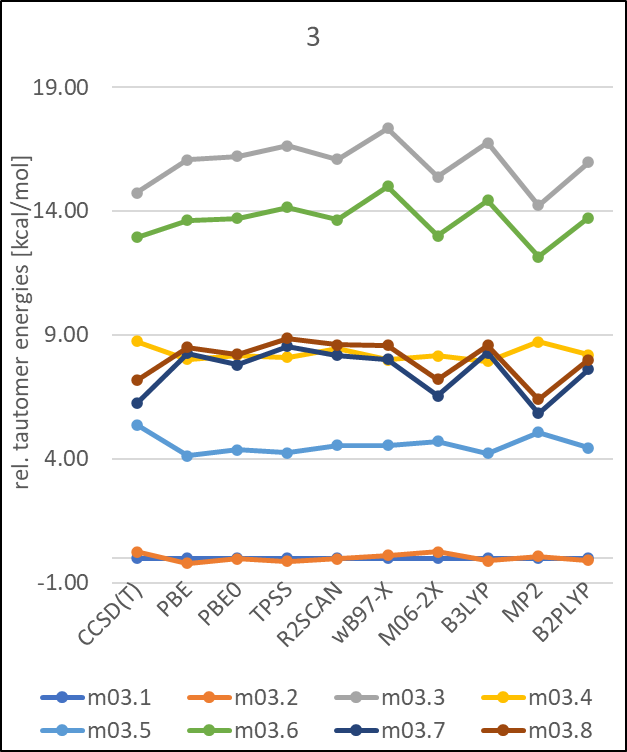


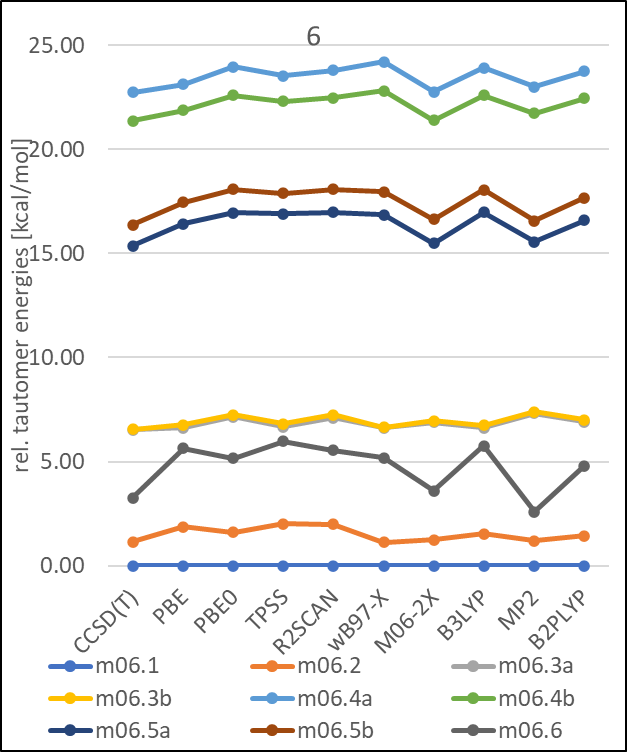

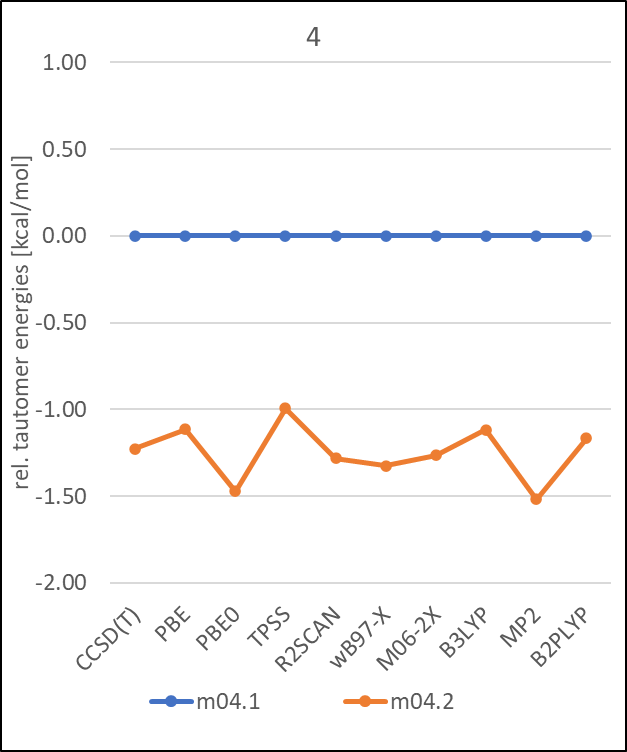

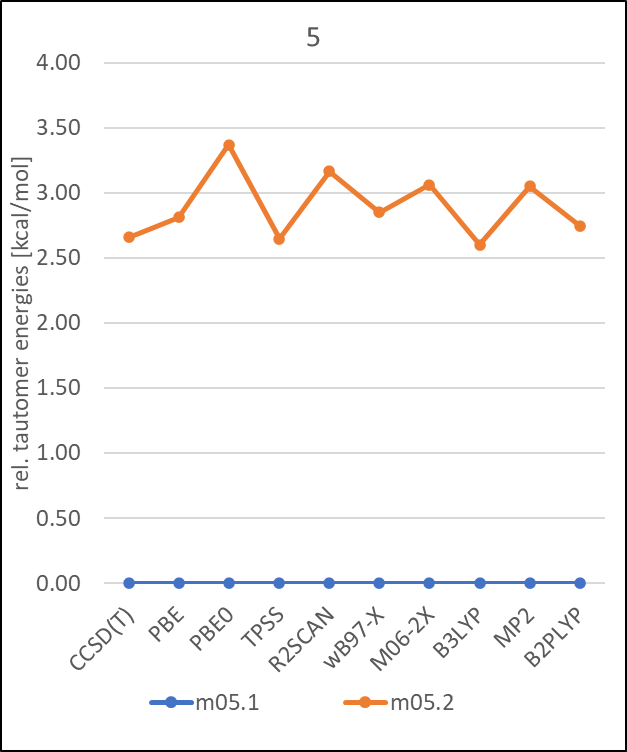


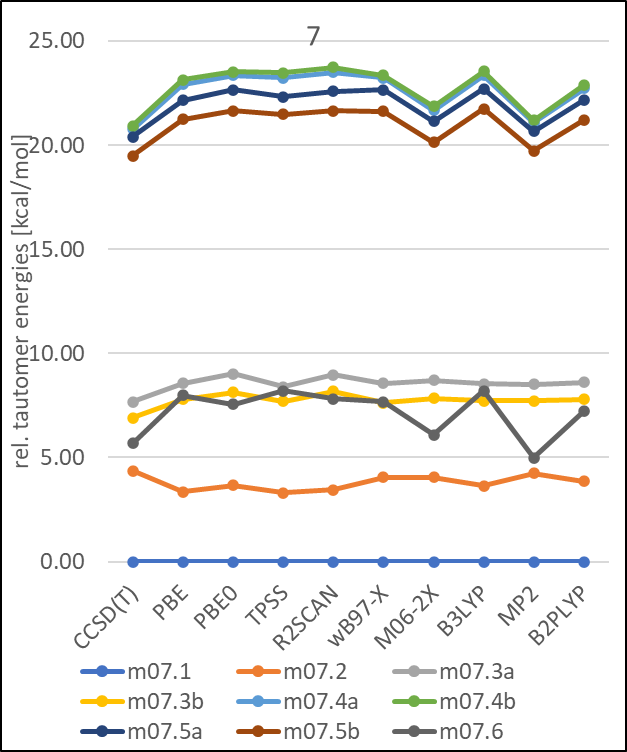

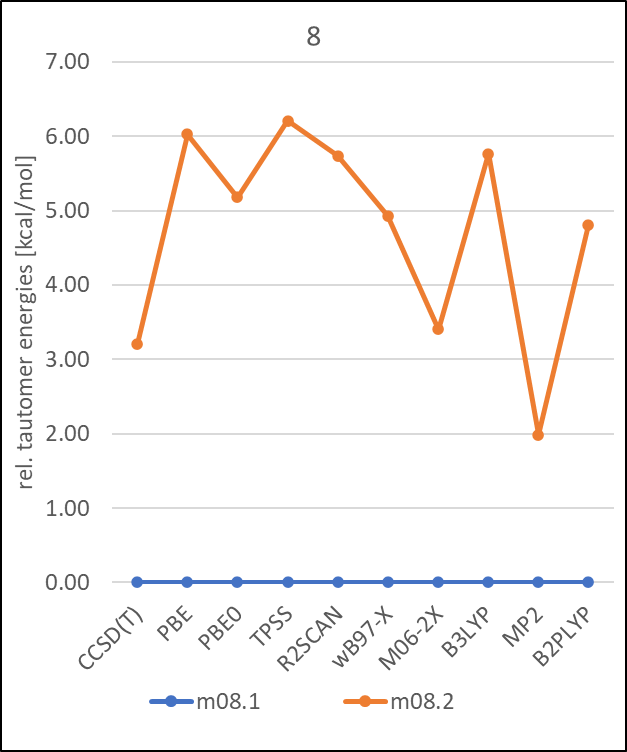

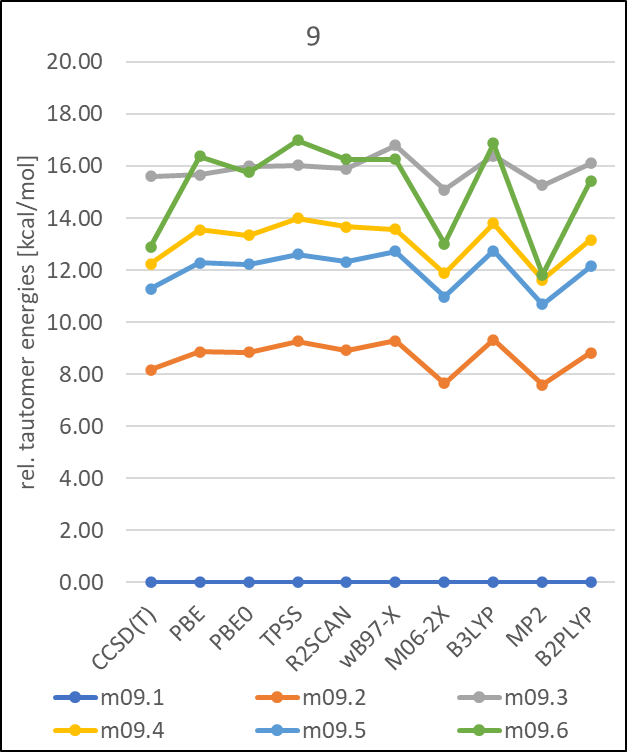


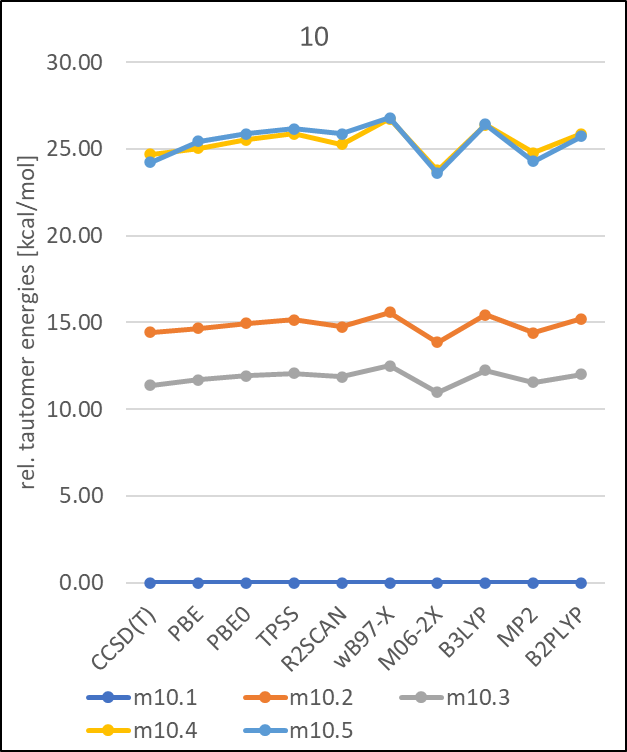

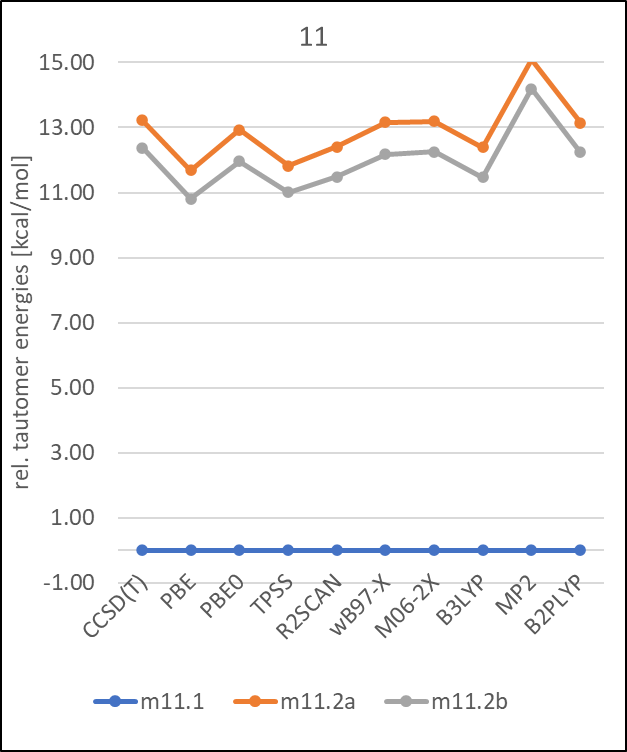

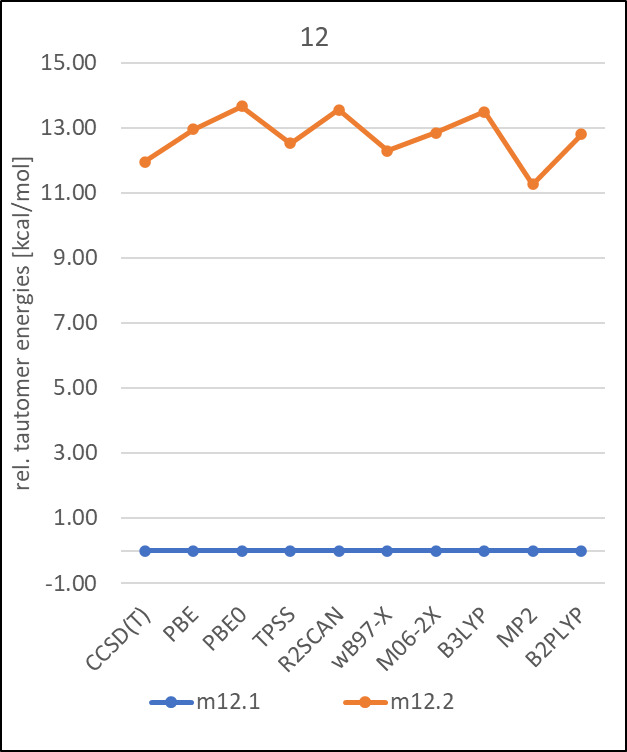


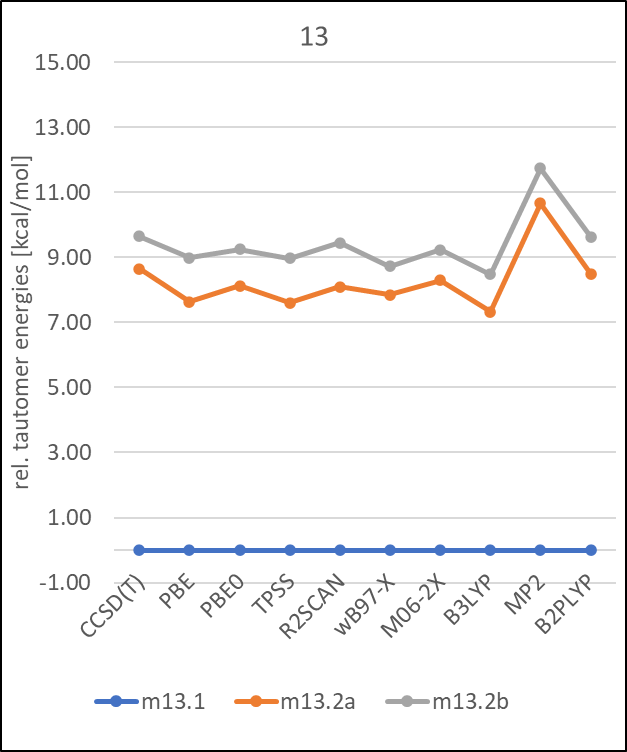


Figure S1: Comparison of tautomer state energies calculated with CCSD(T), MP2 and various DFT methods and def2-QZVPP basis set the 13 molecules.in SMD continuum solvation model.


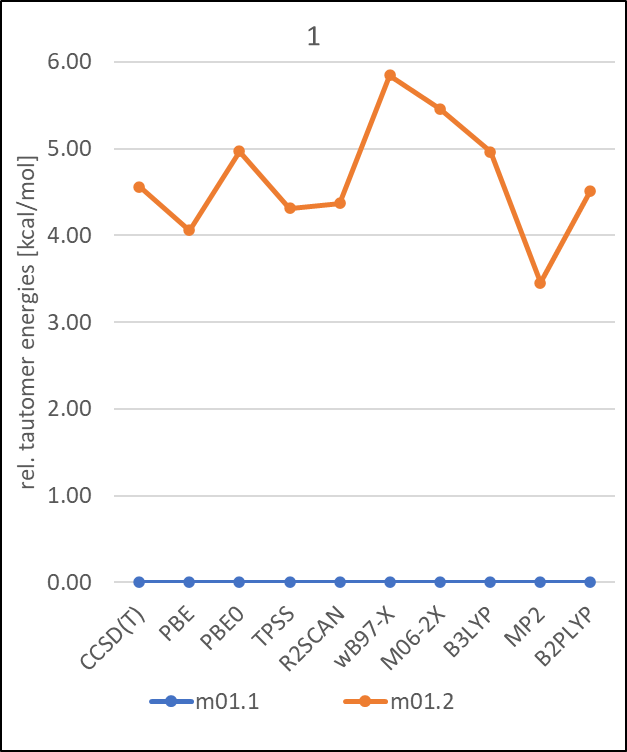

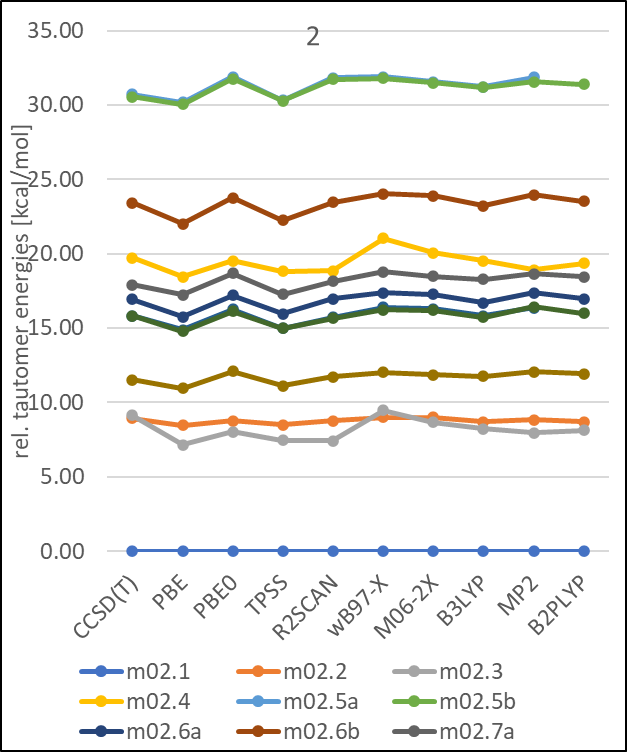

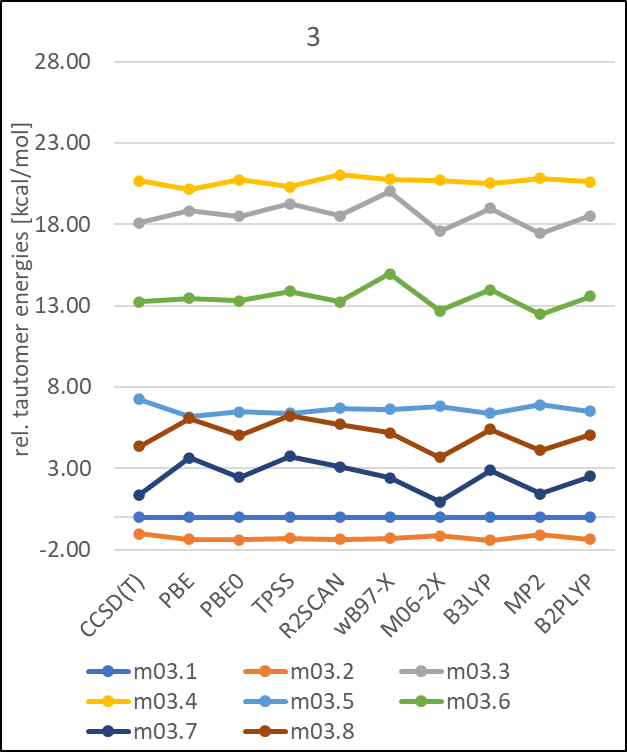


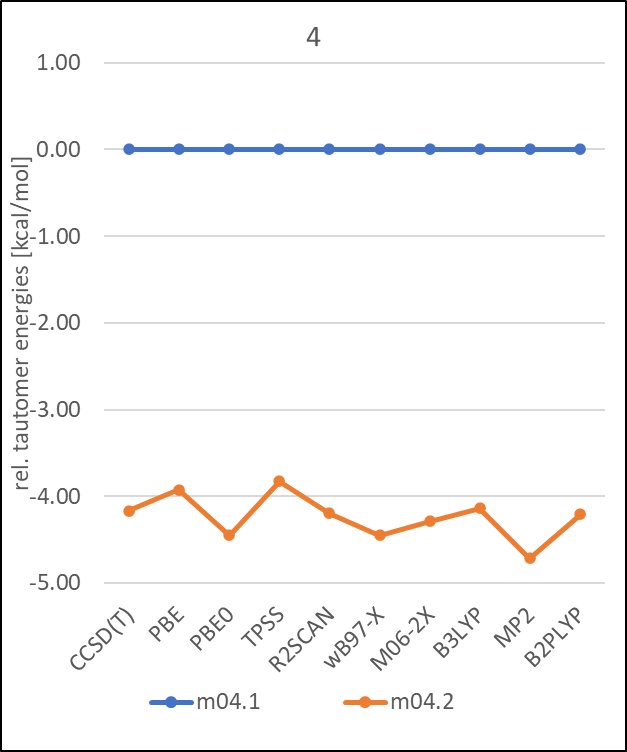

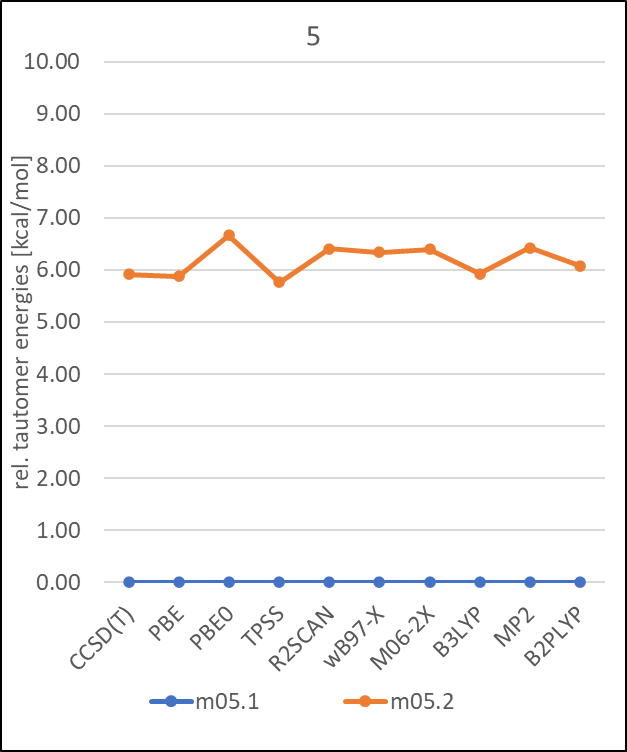

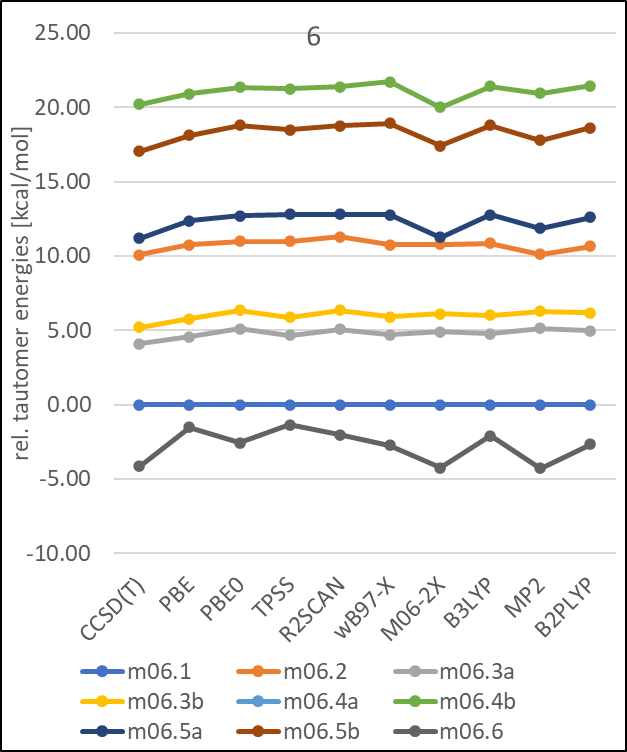


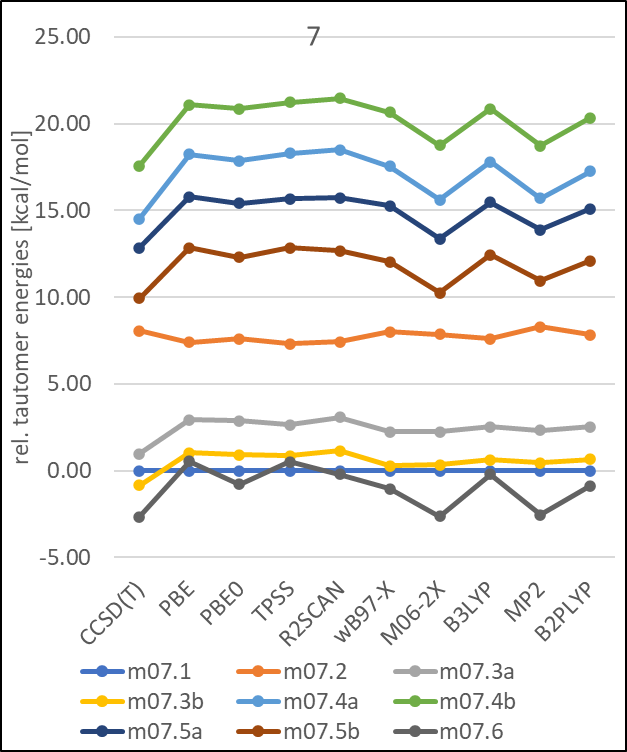

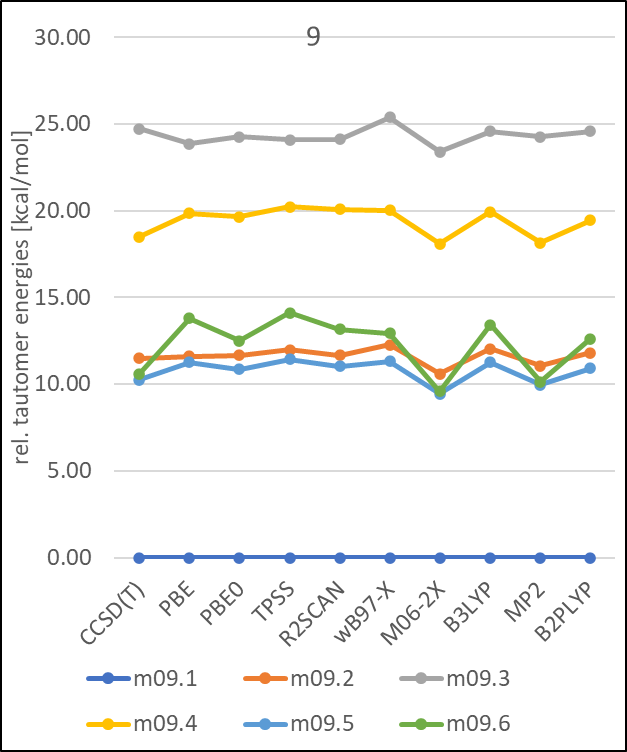

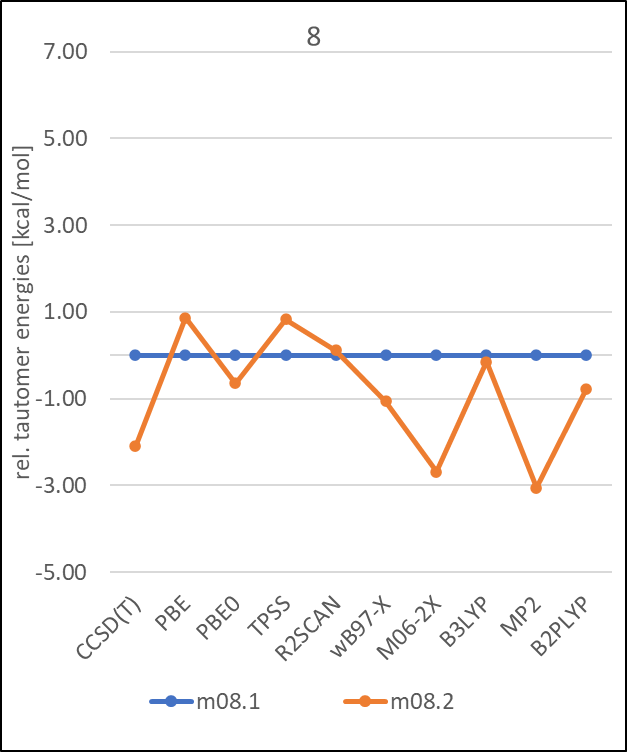


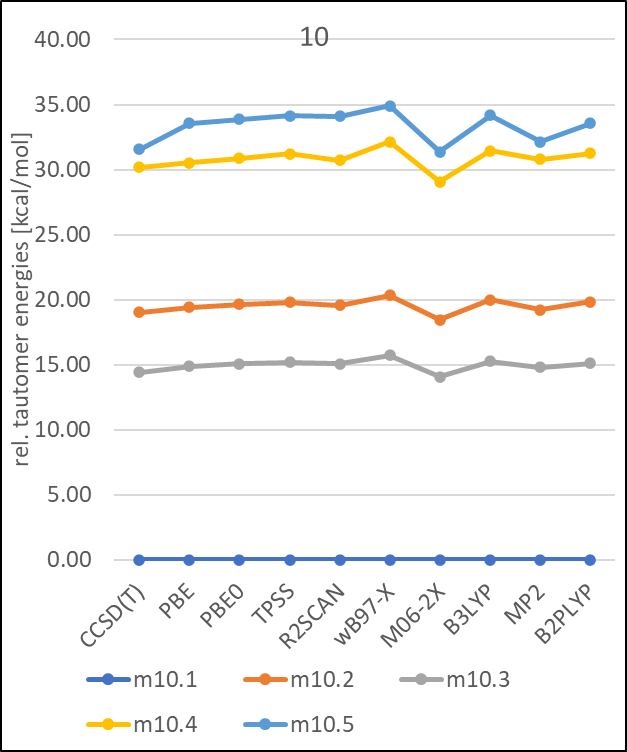

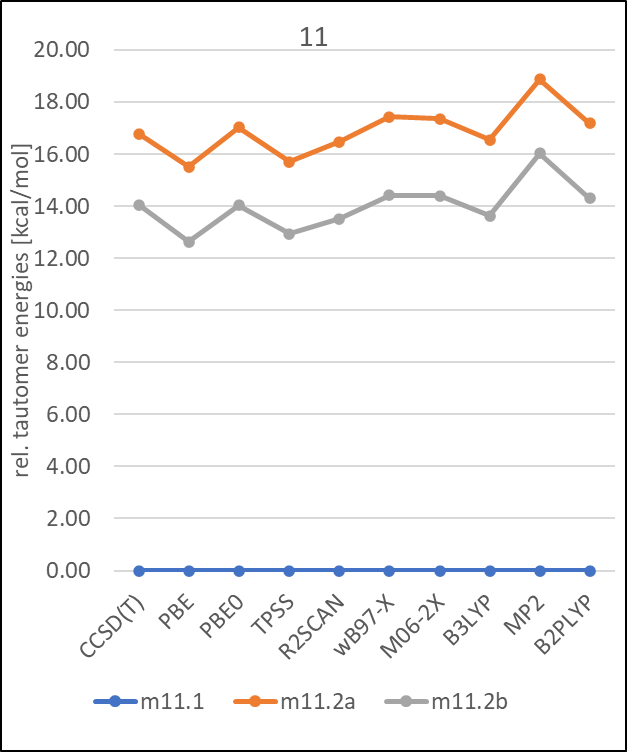

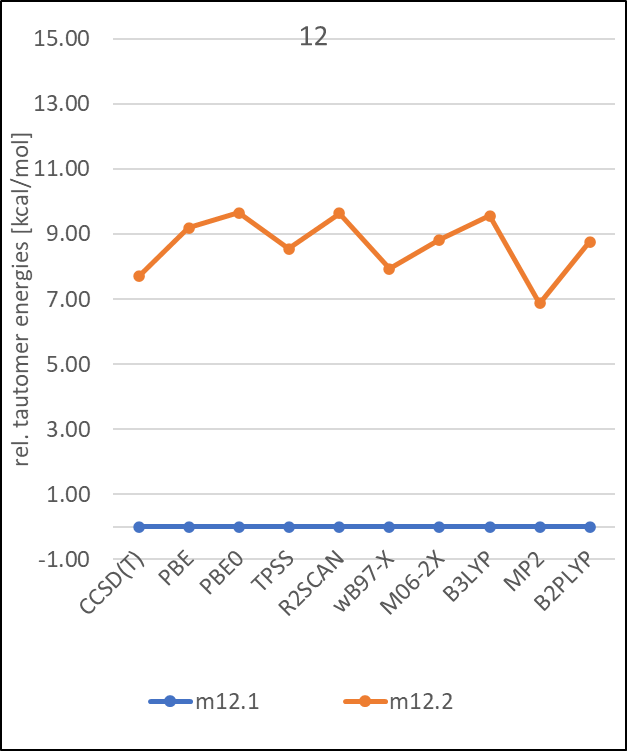


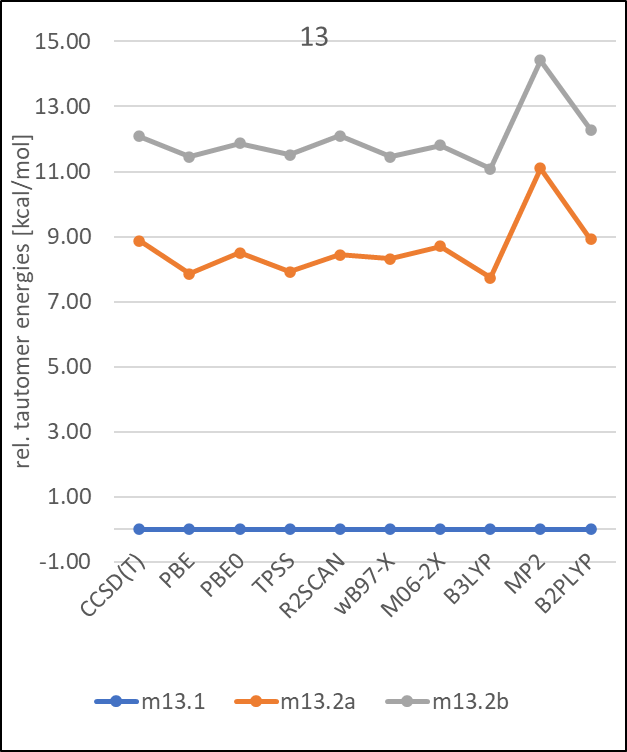


Figure S2: Comparison of tautomer state energies calculated with CCSD(T), MP2 and various DFT methods and def2-QZVPP basis set the 13 molecules.in gas-phase.


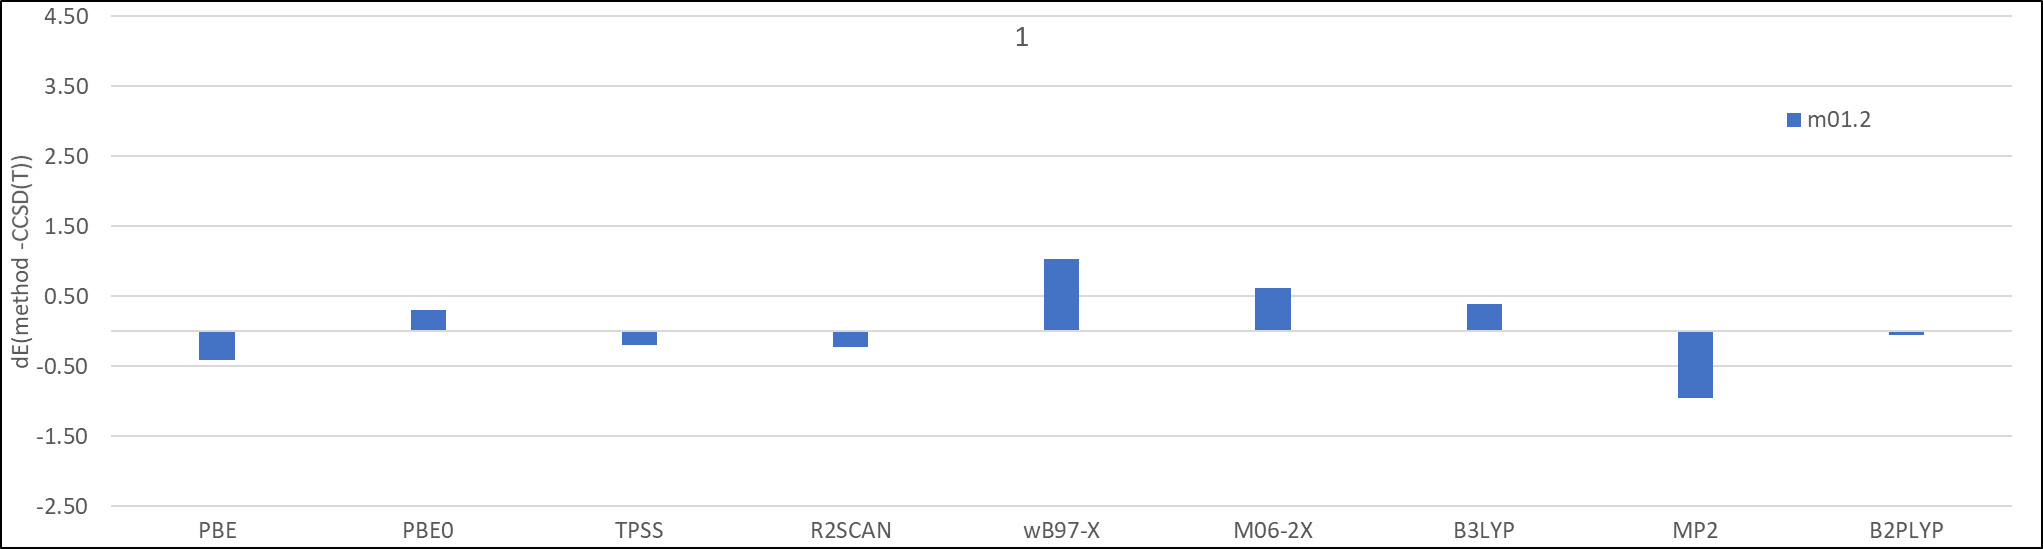


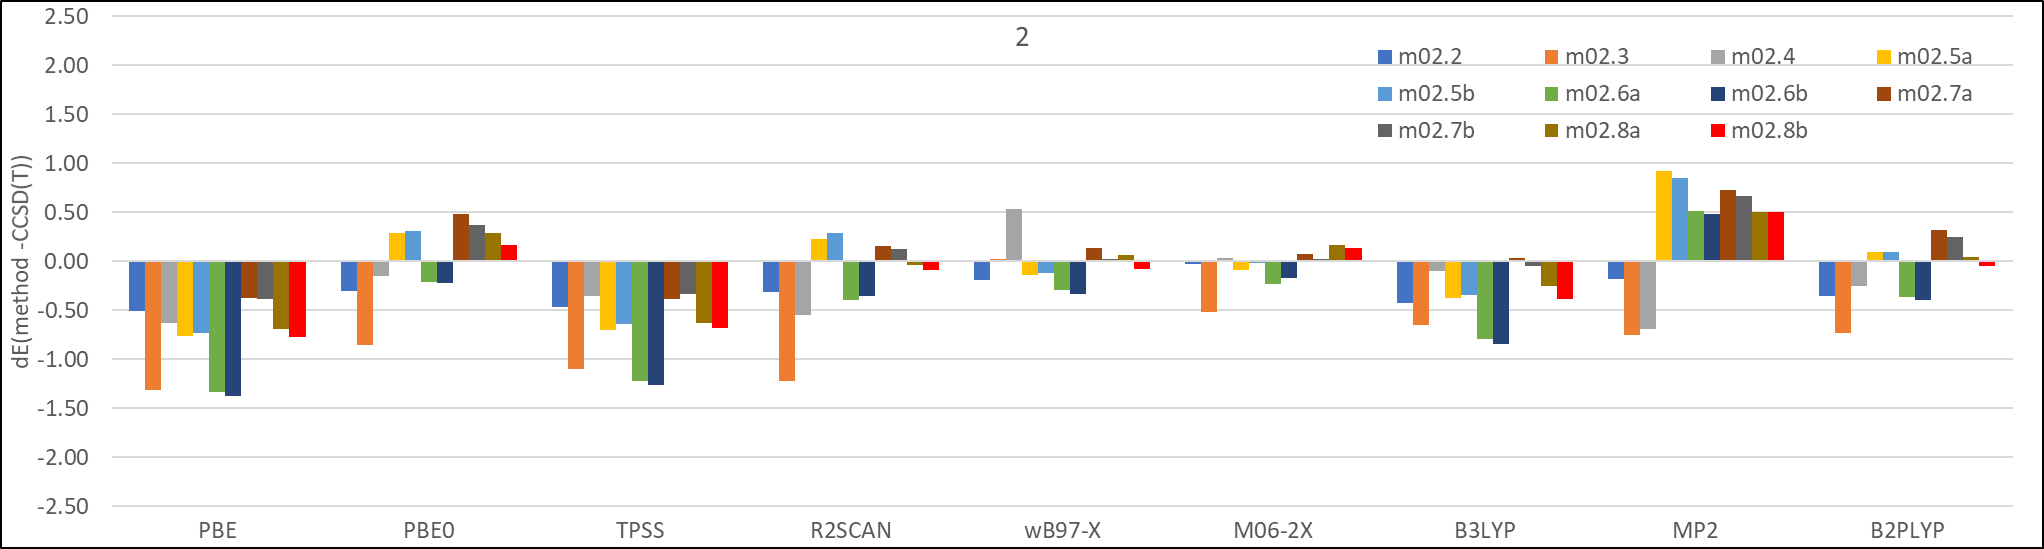


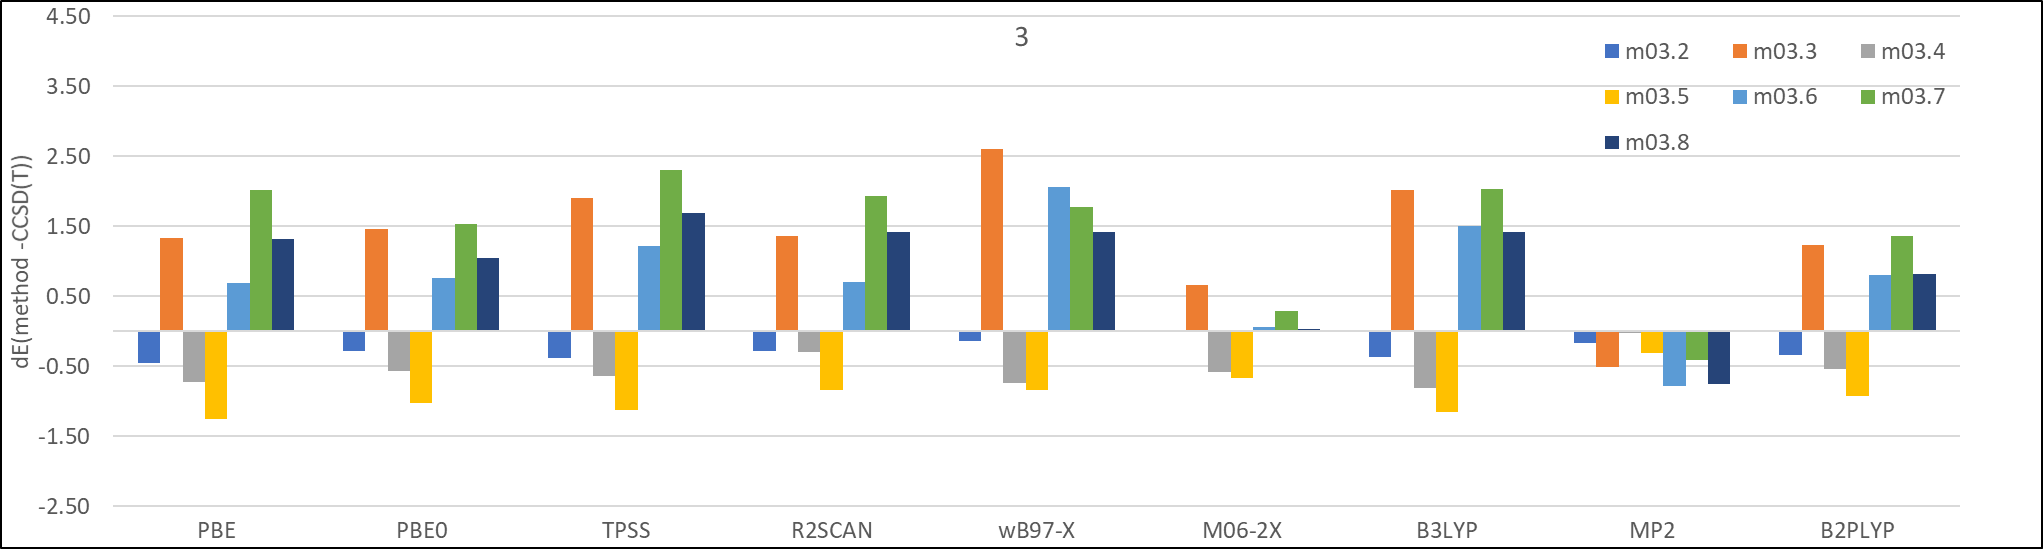


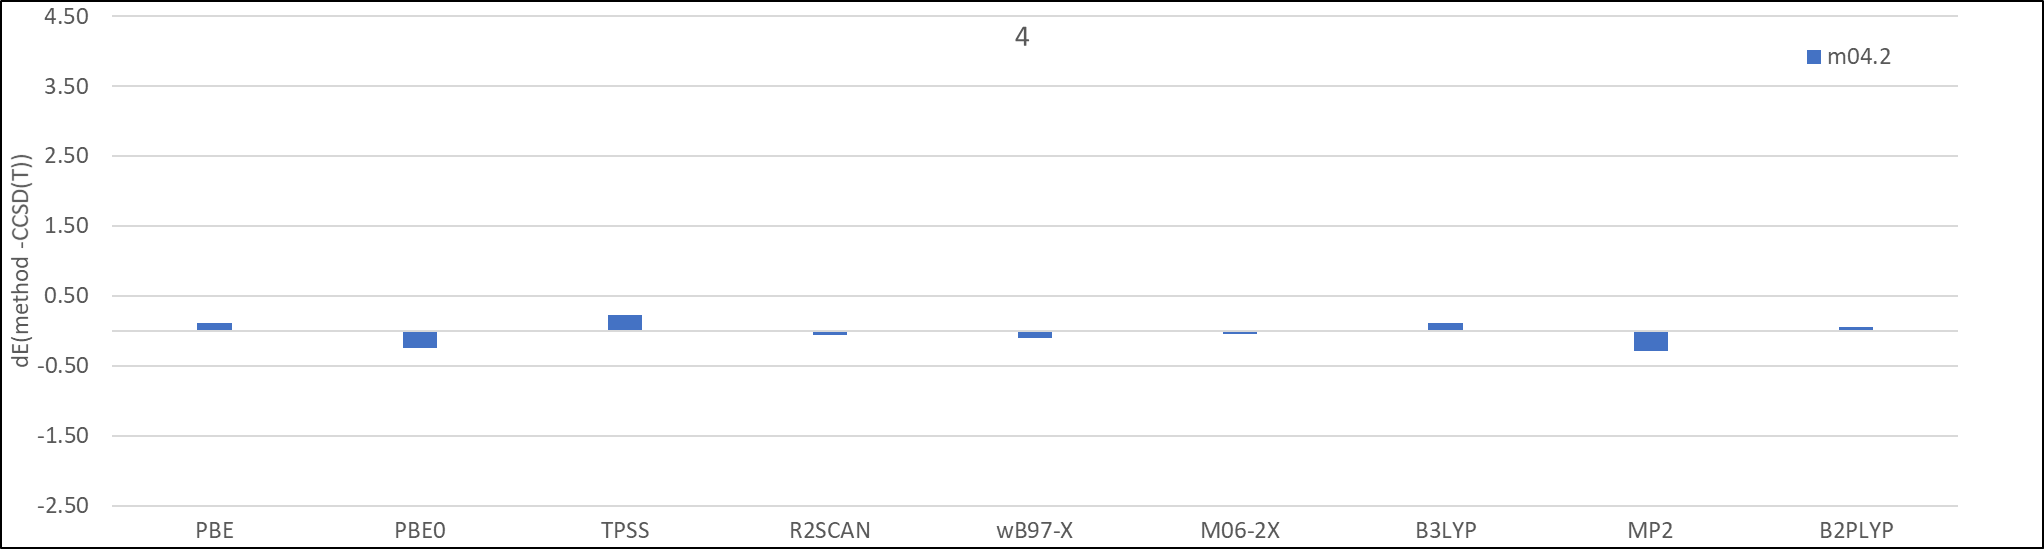


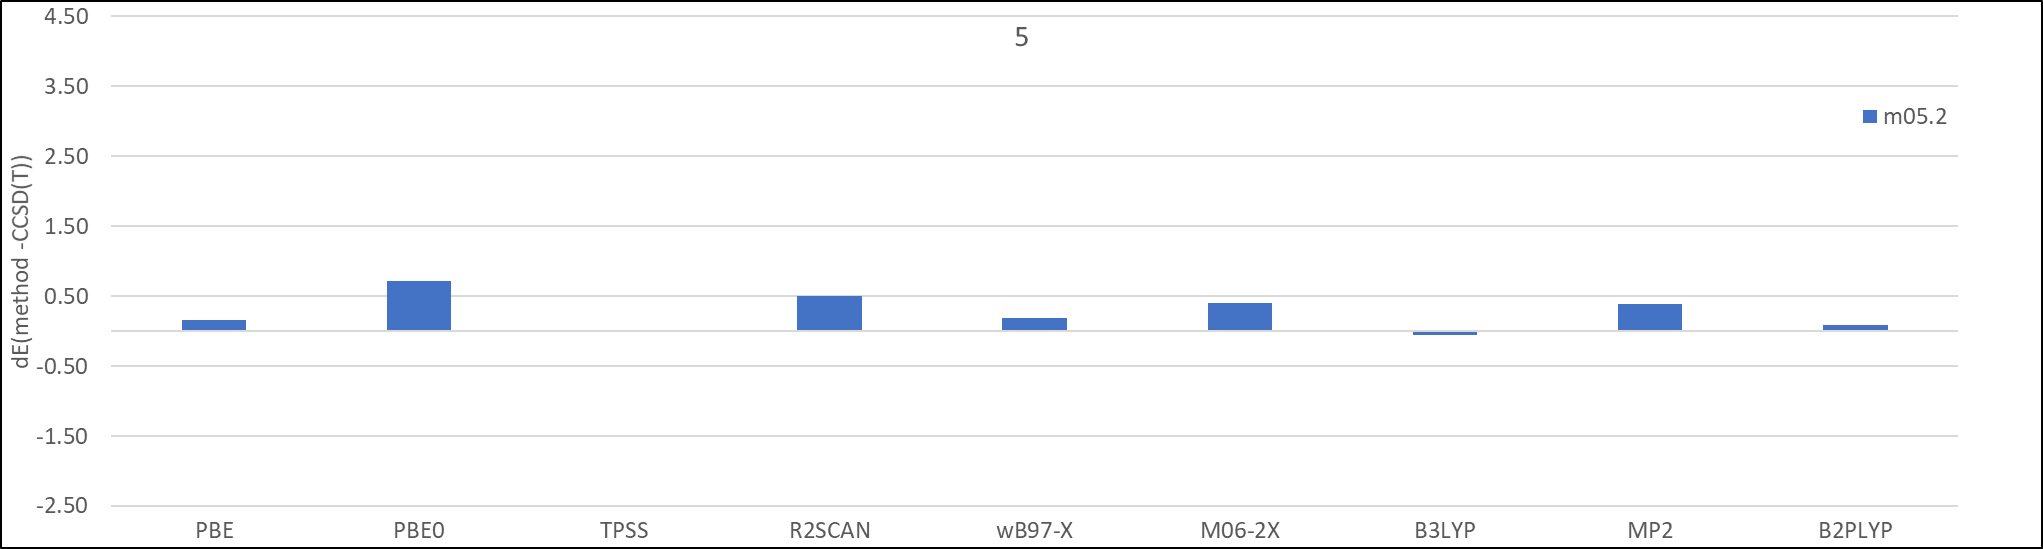


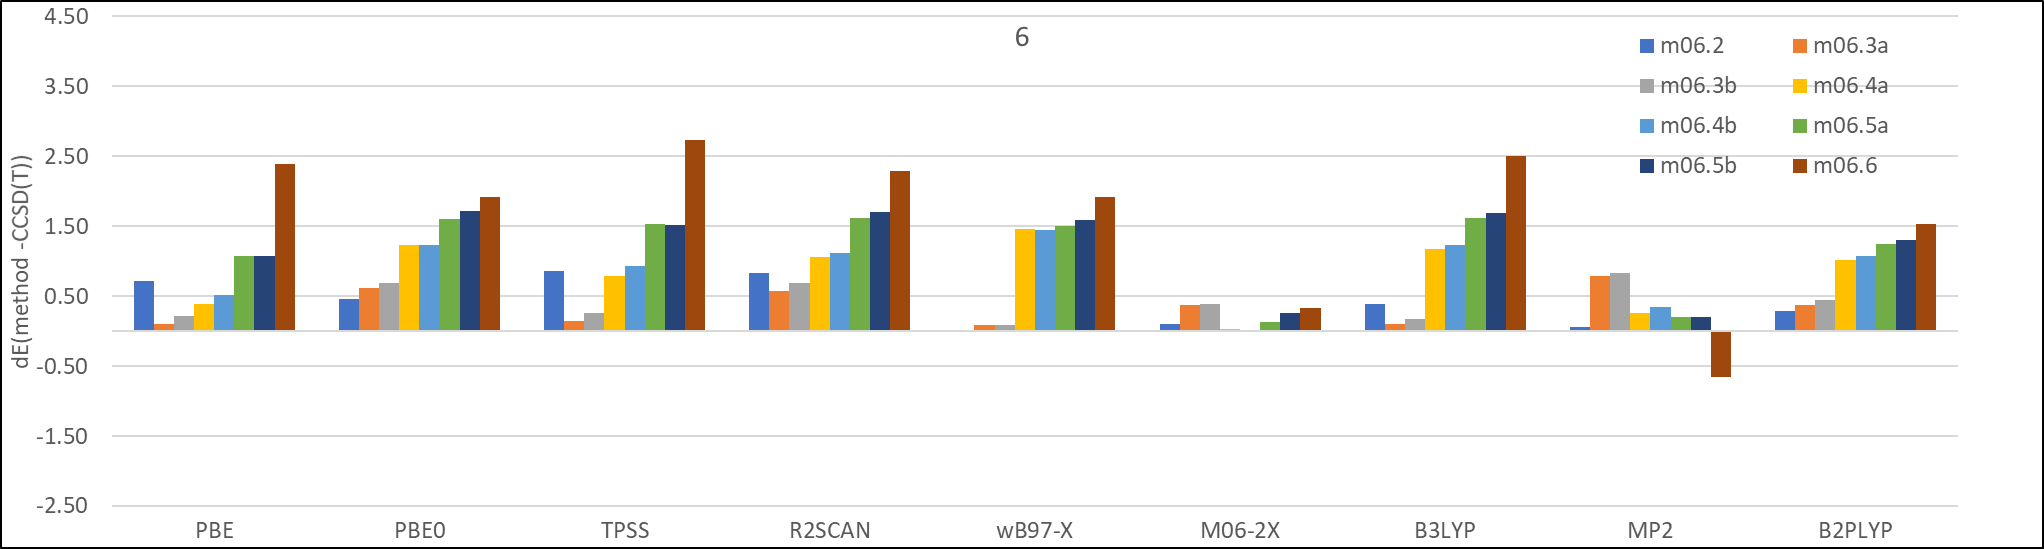


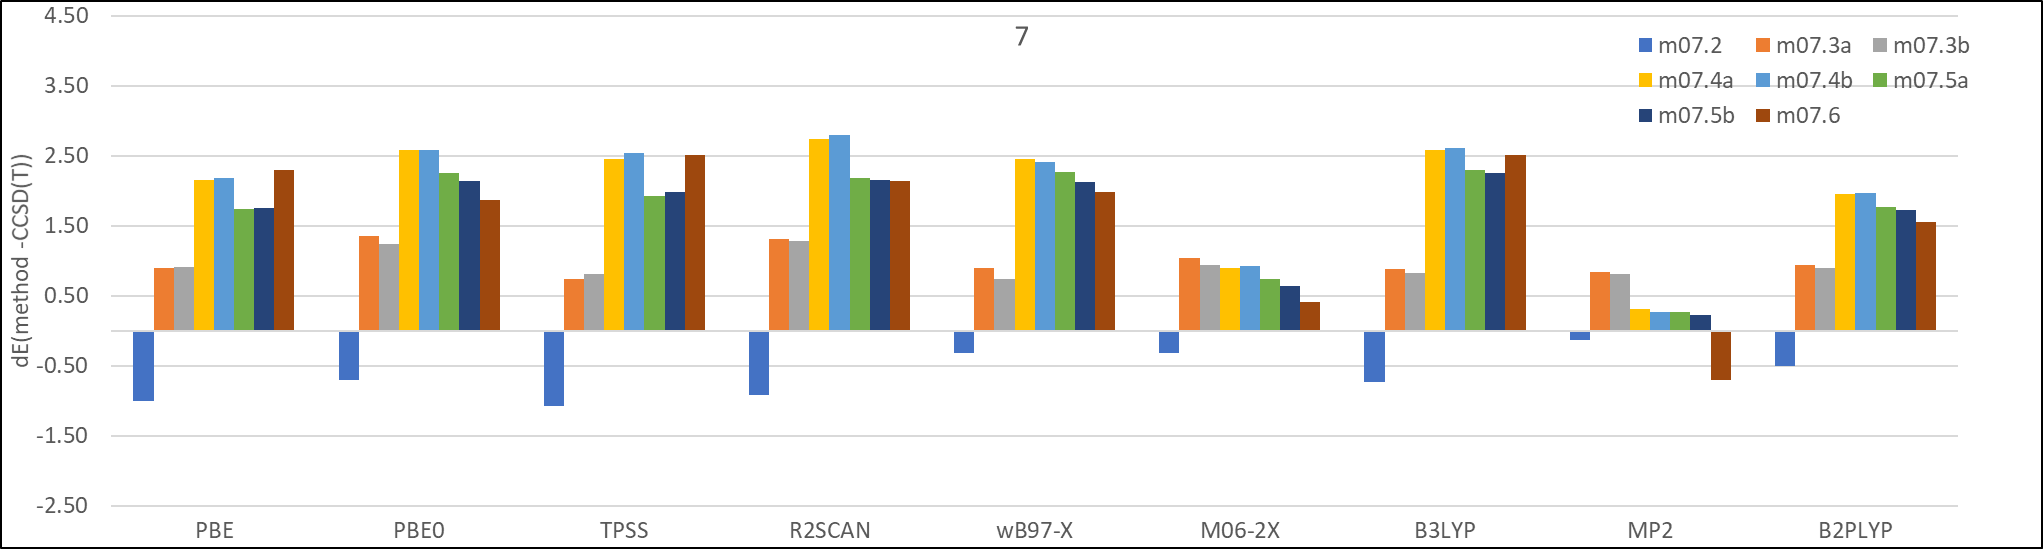


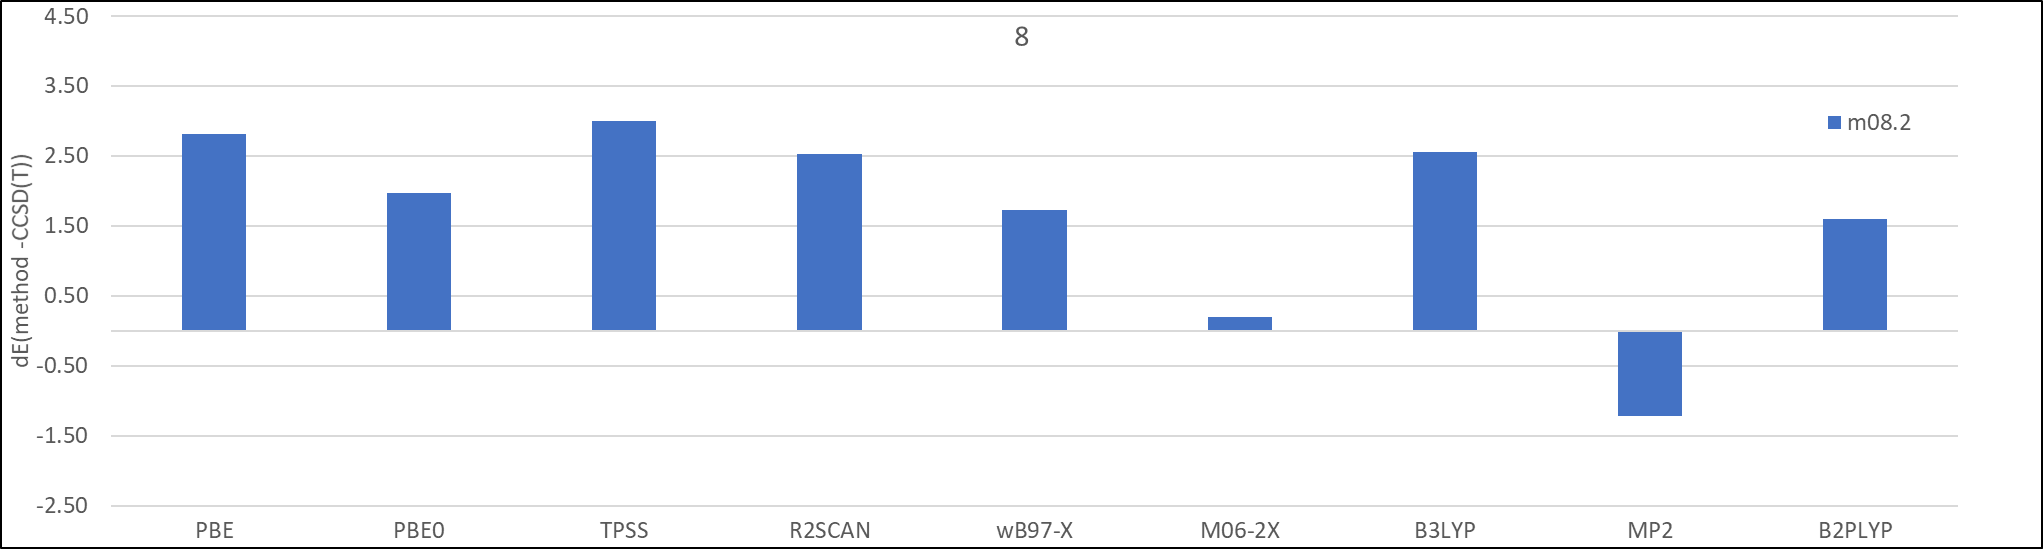


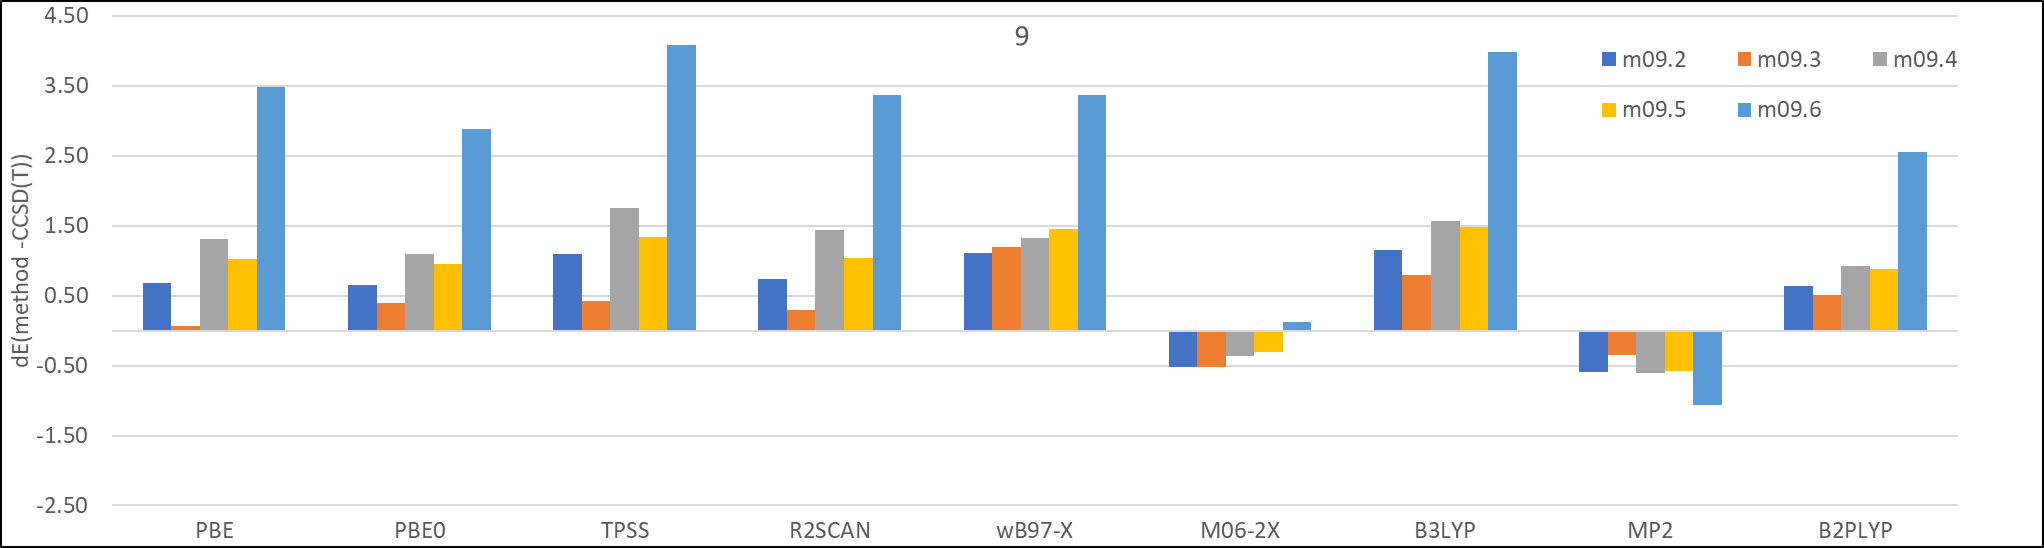


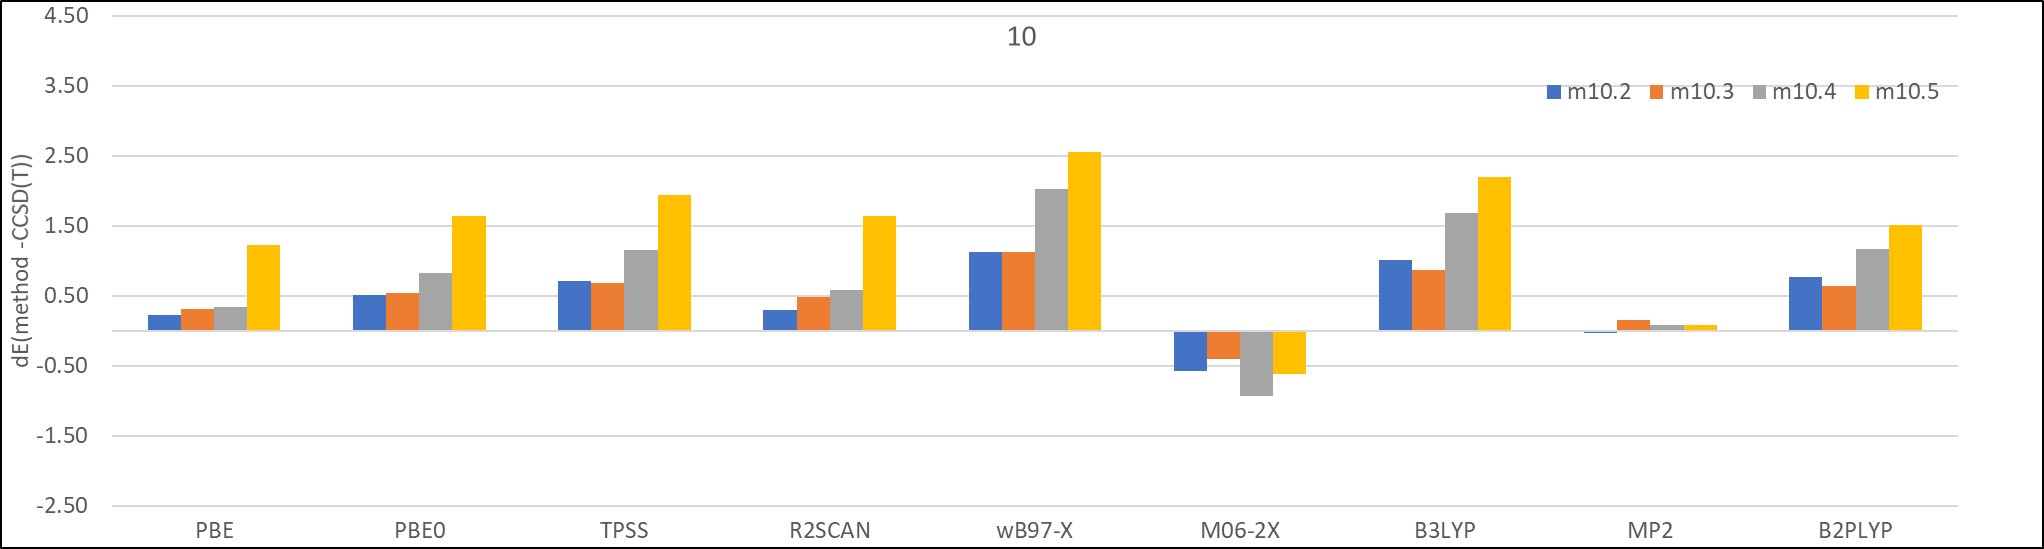


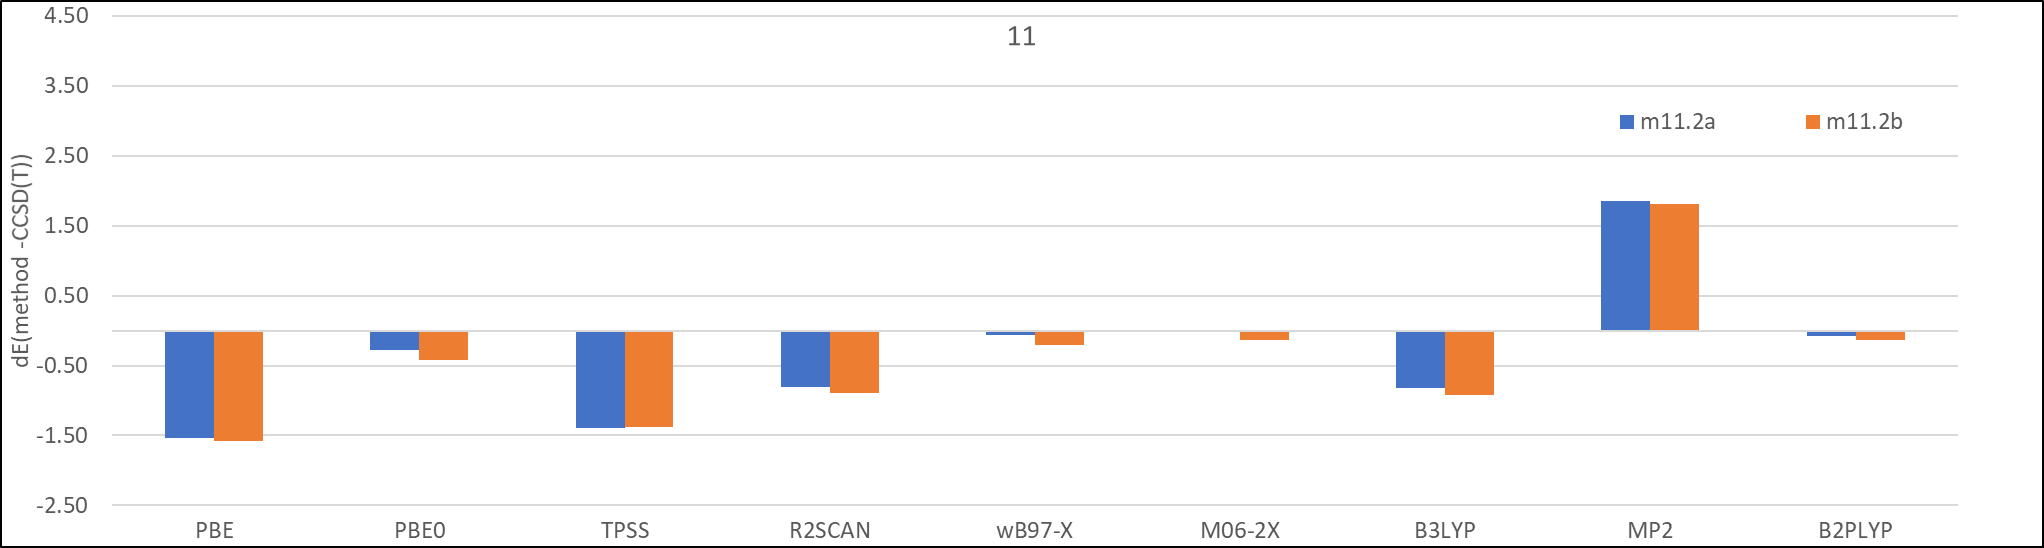


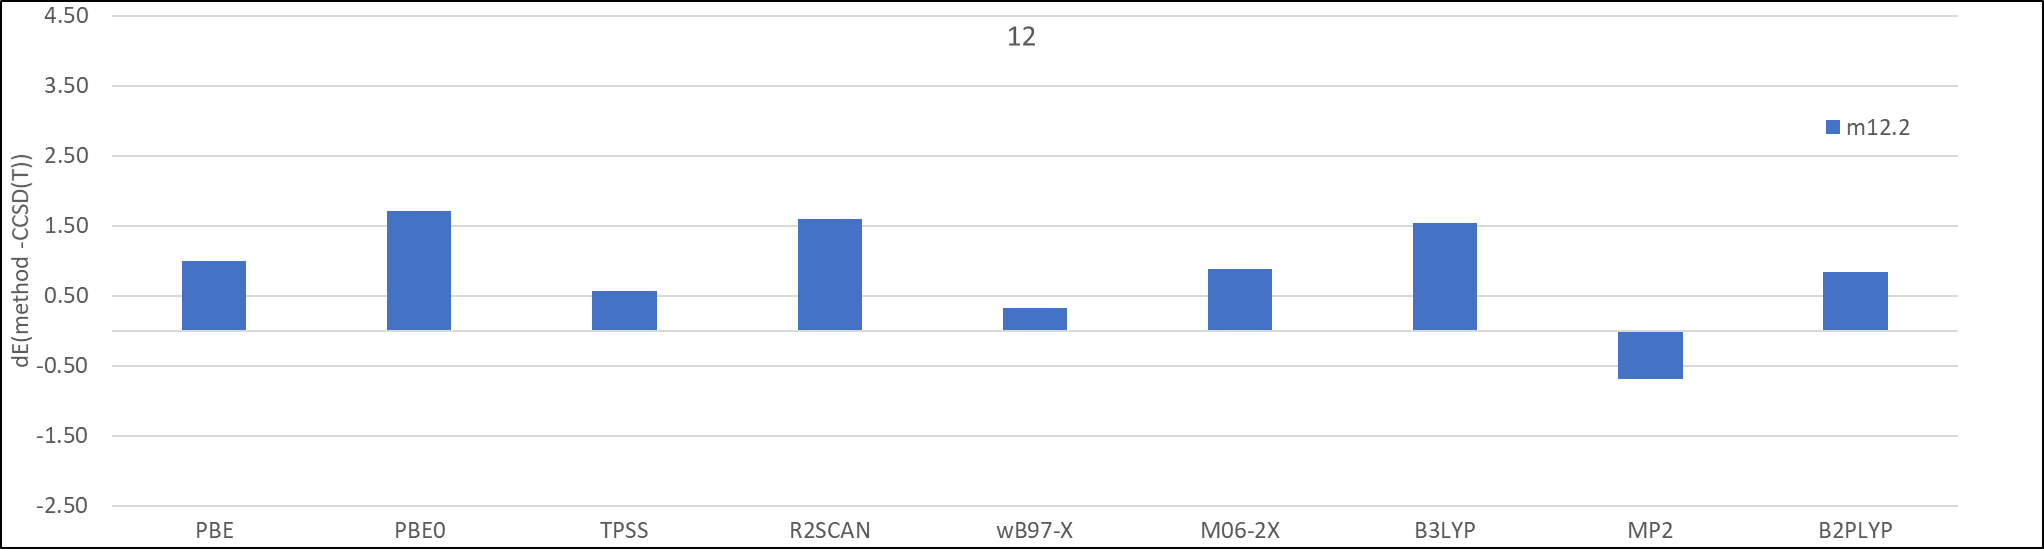


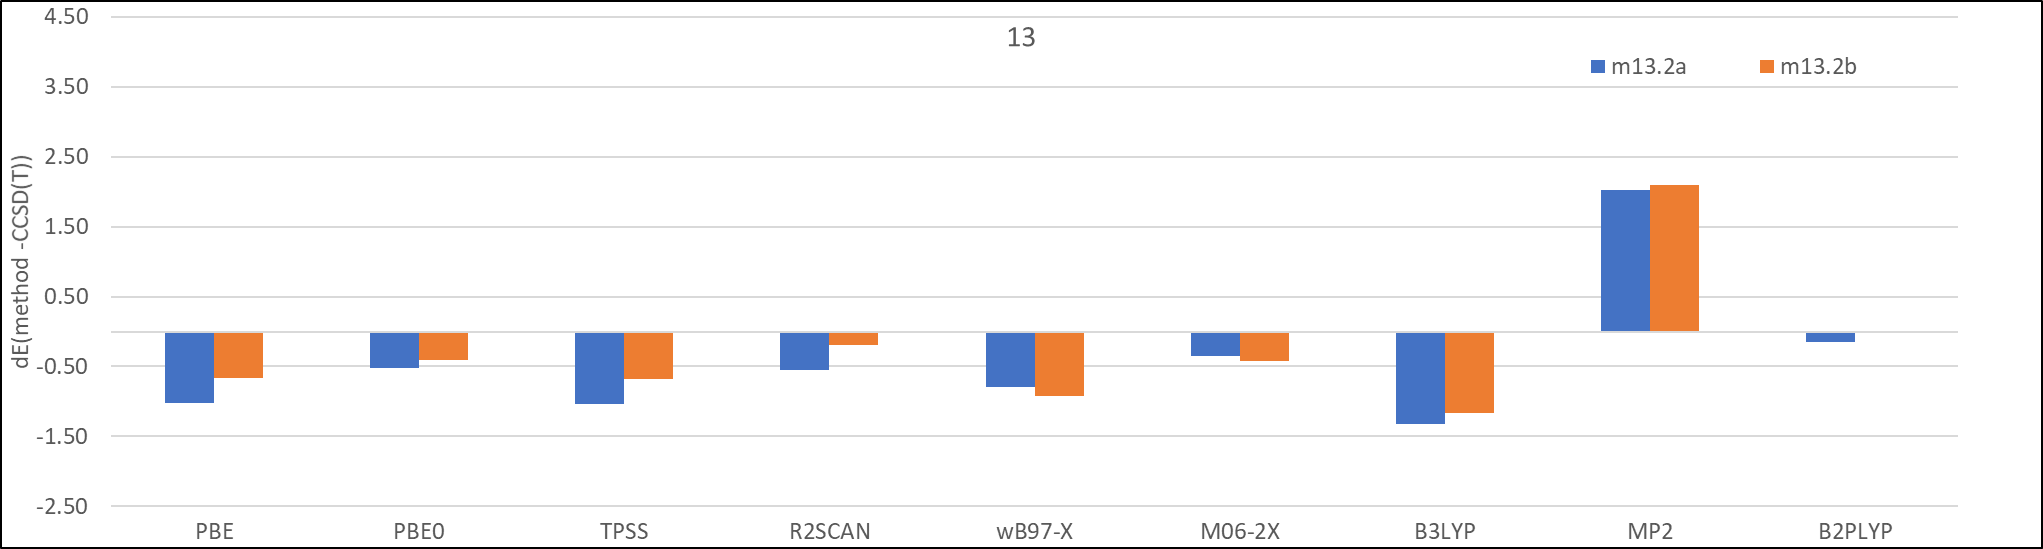


Figure S3: SMD water solvation tautomer state energy differences in kcal/mol relative to CCSD(T) energy differences for each state for each density functional method and MP2 for calculations (Note that y-axis scales are different for the plots).


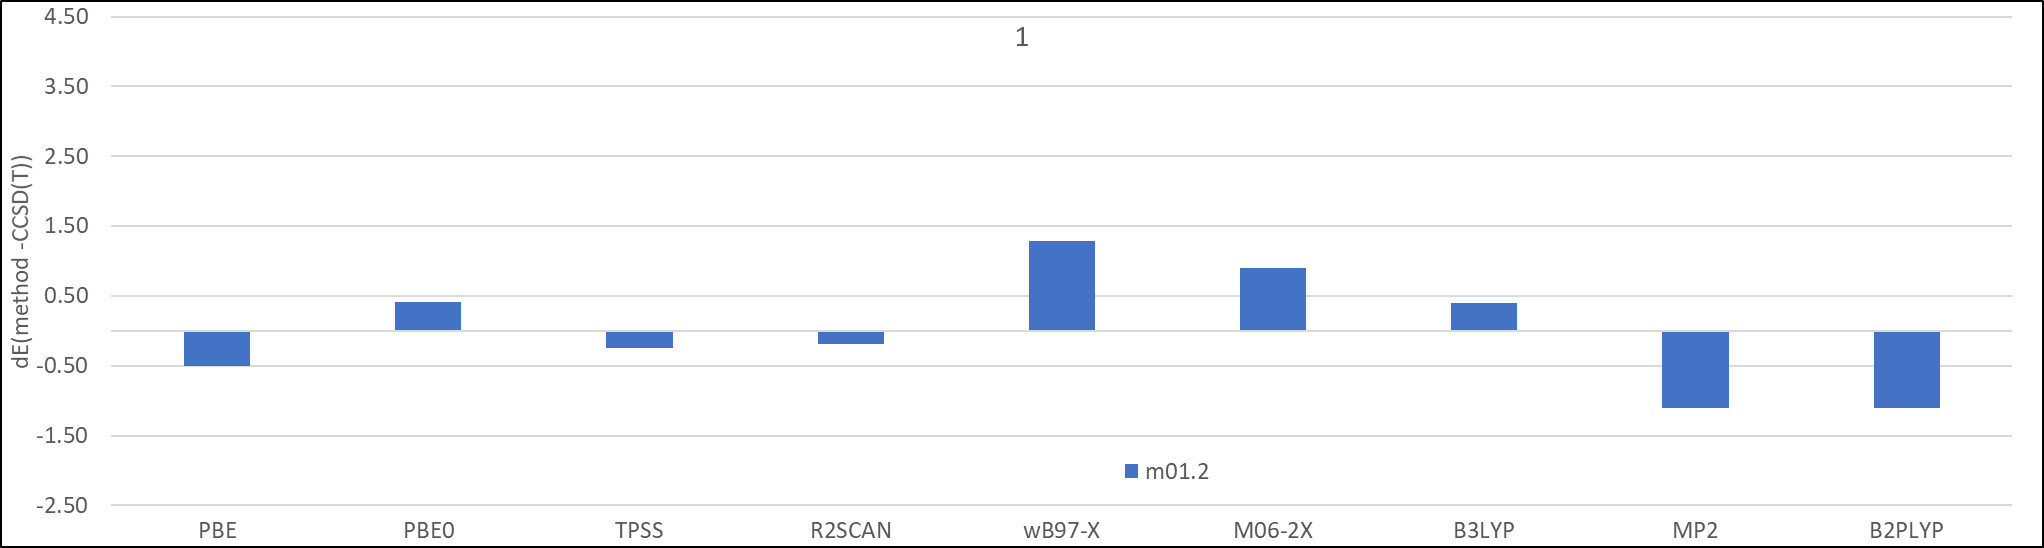


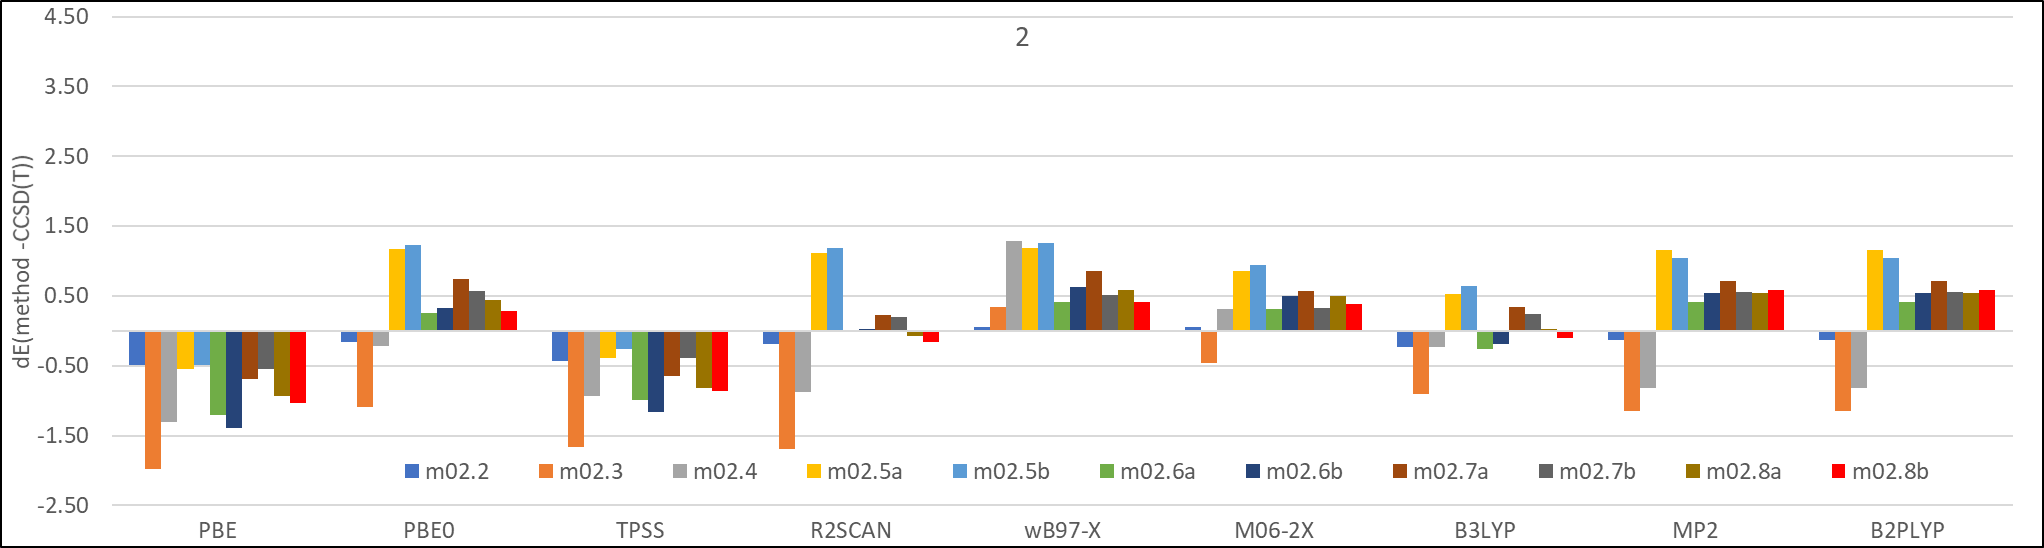


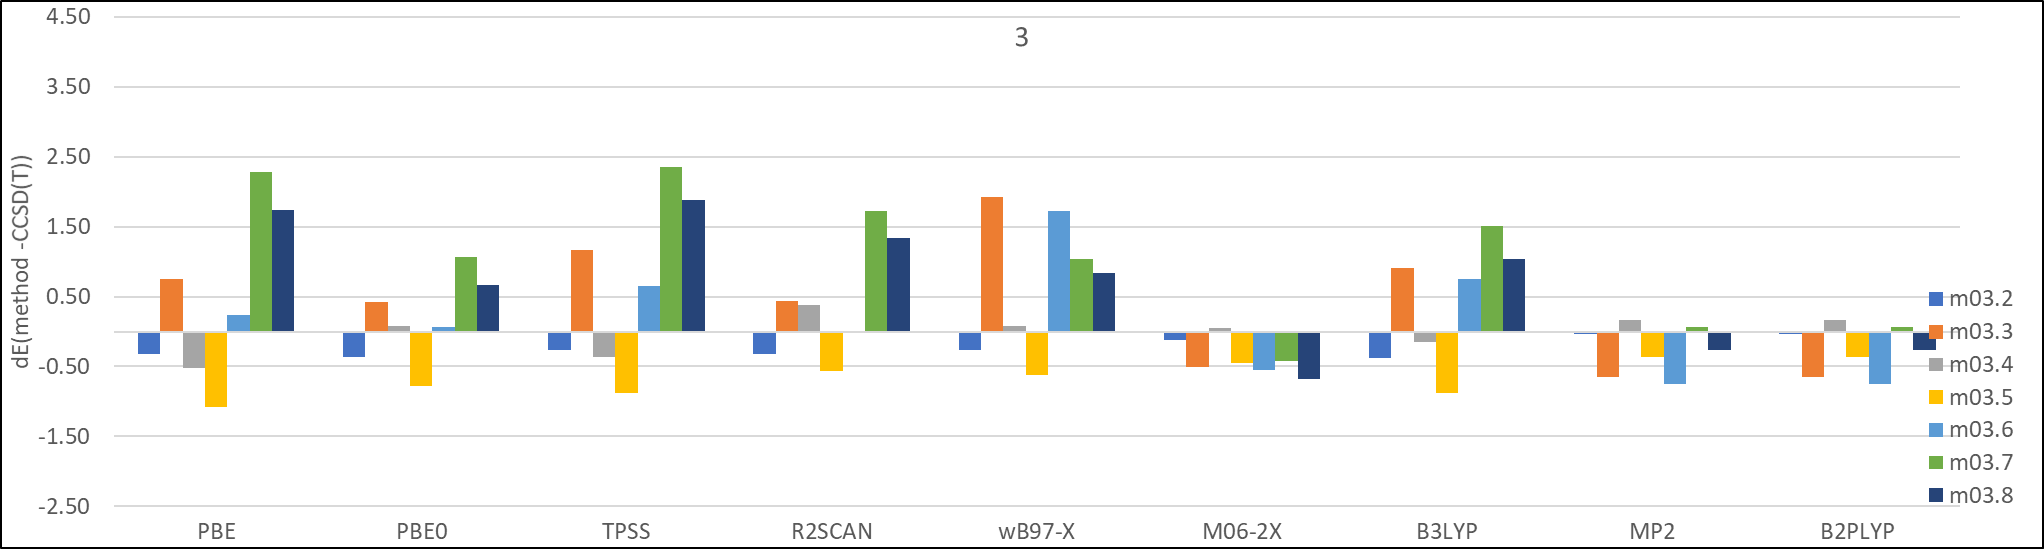


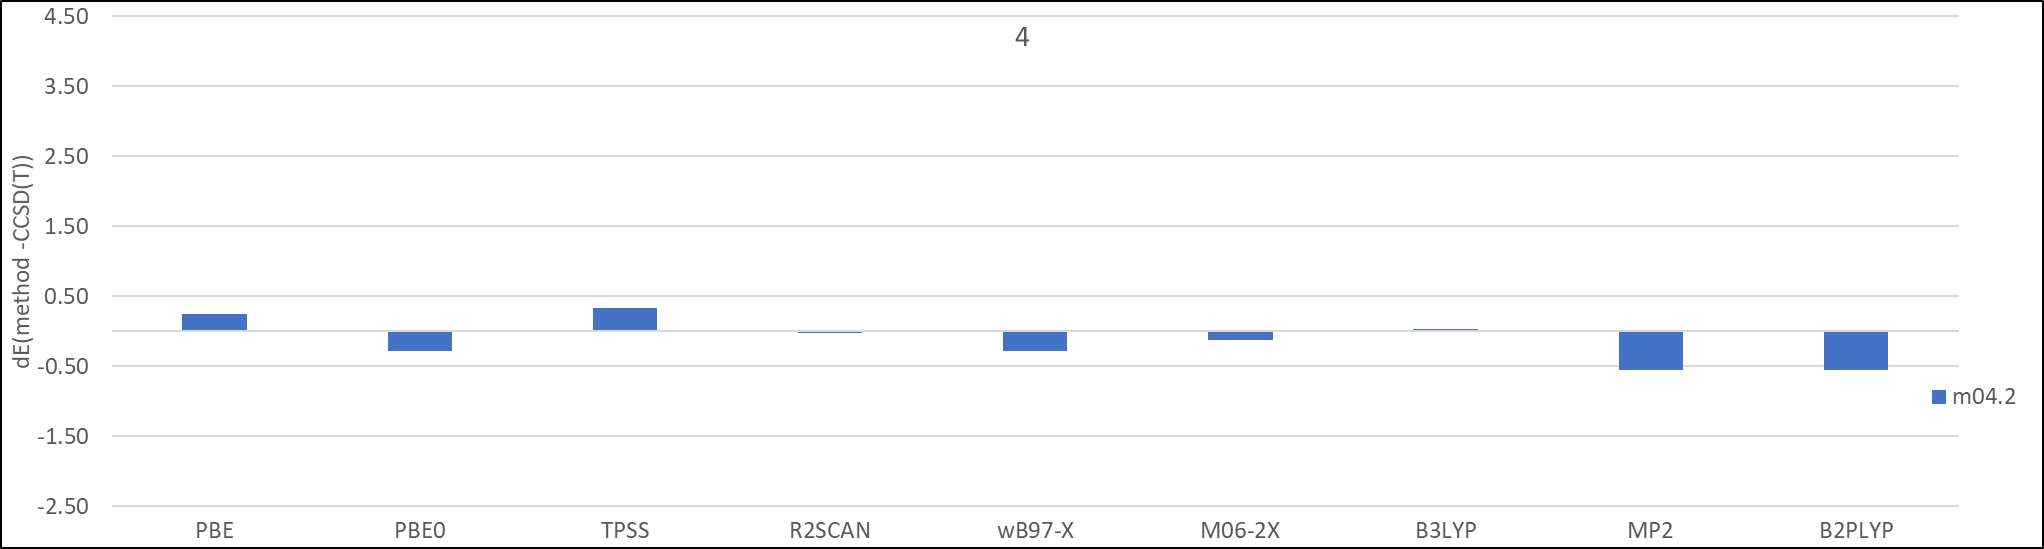


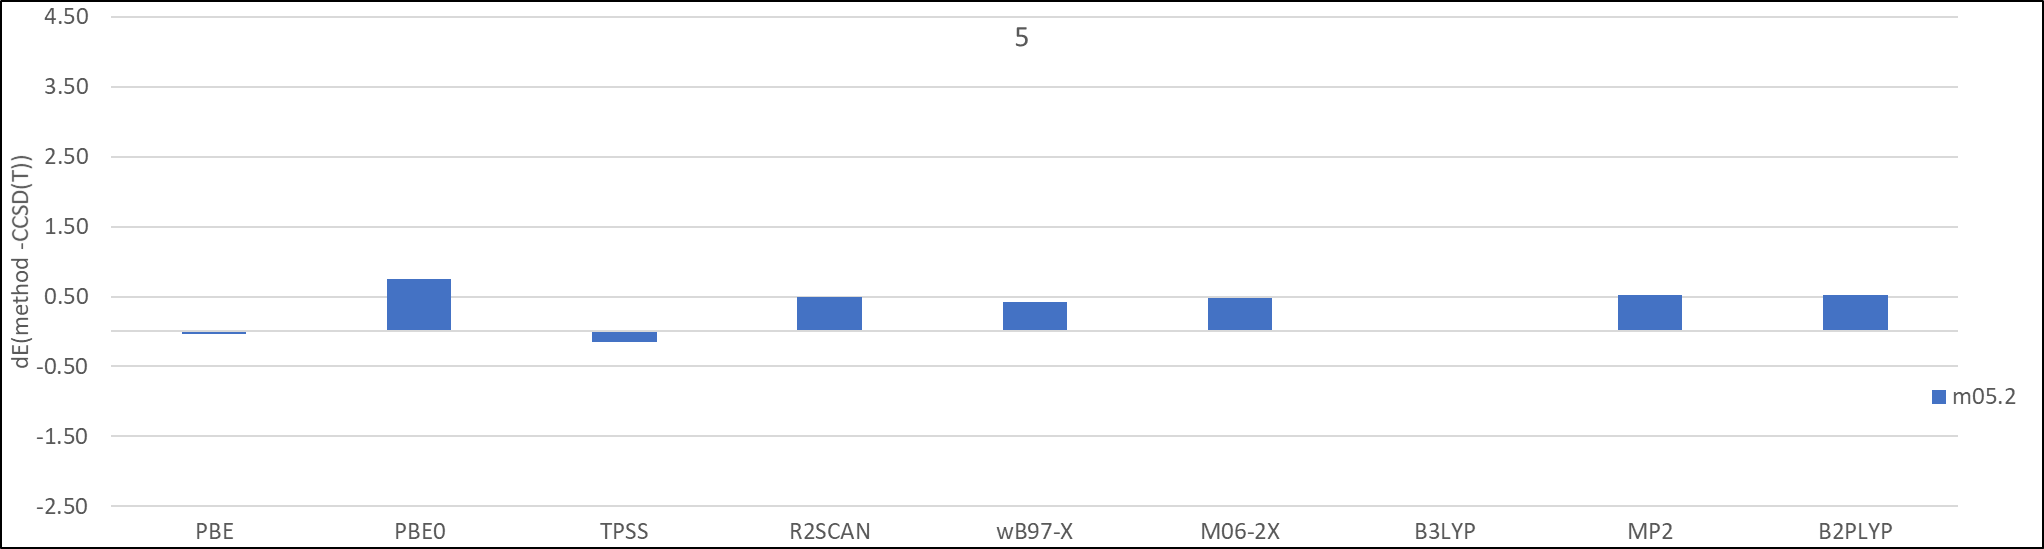


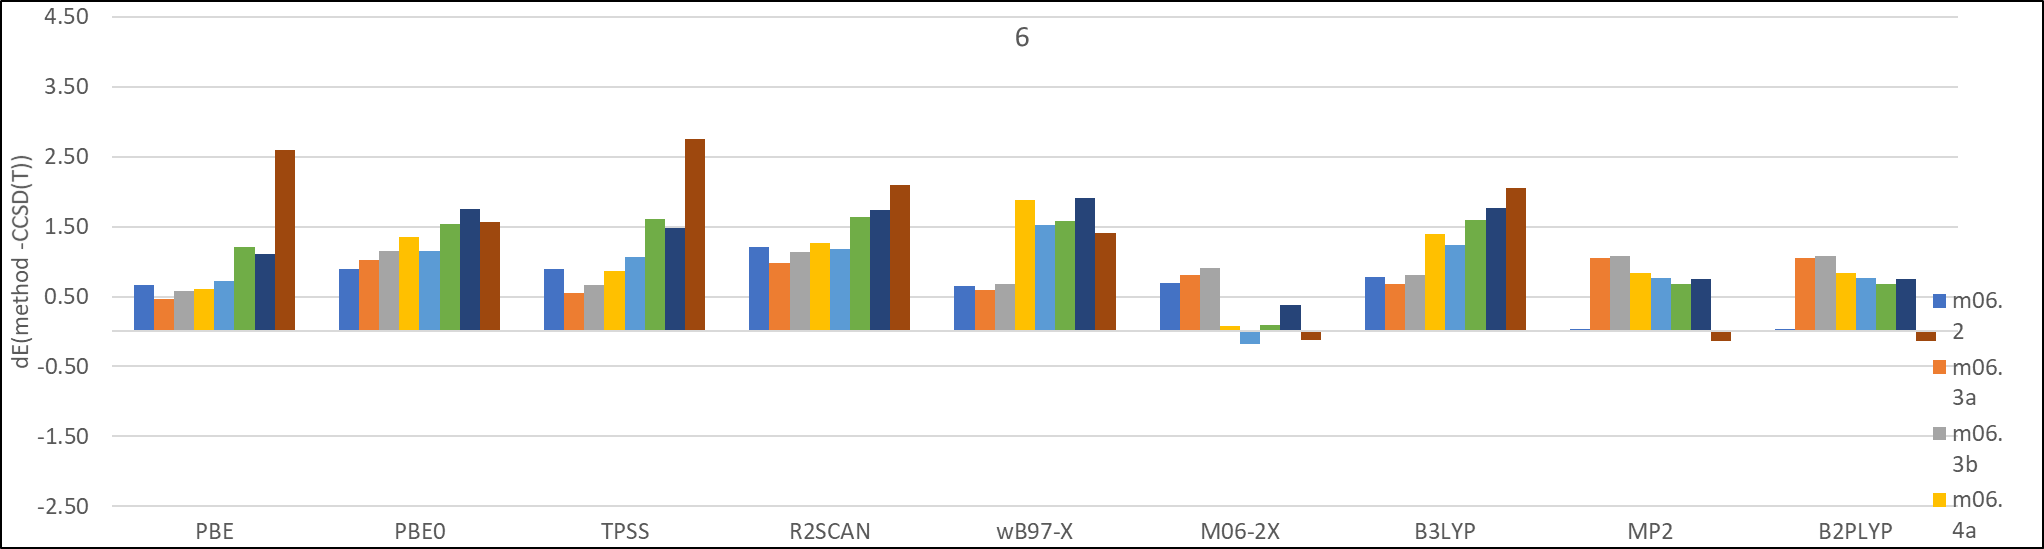


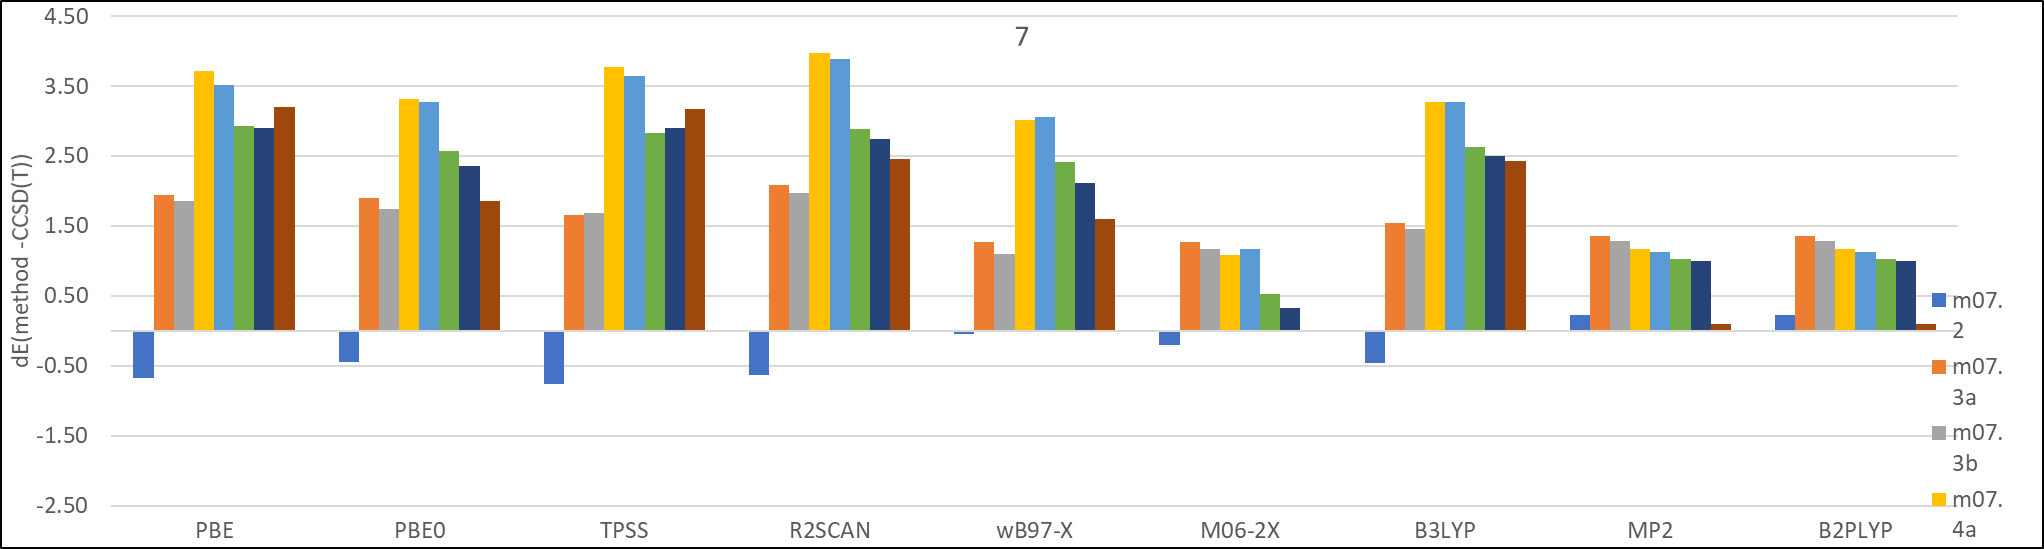


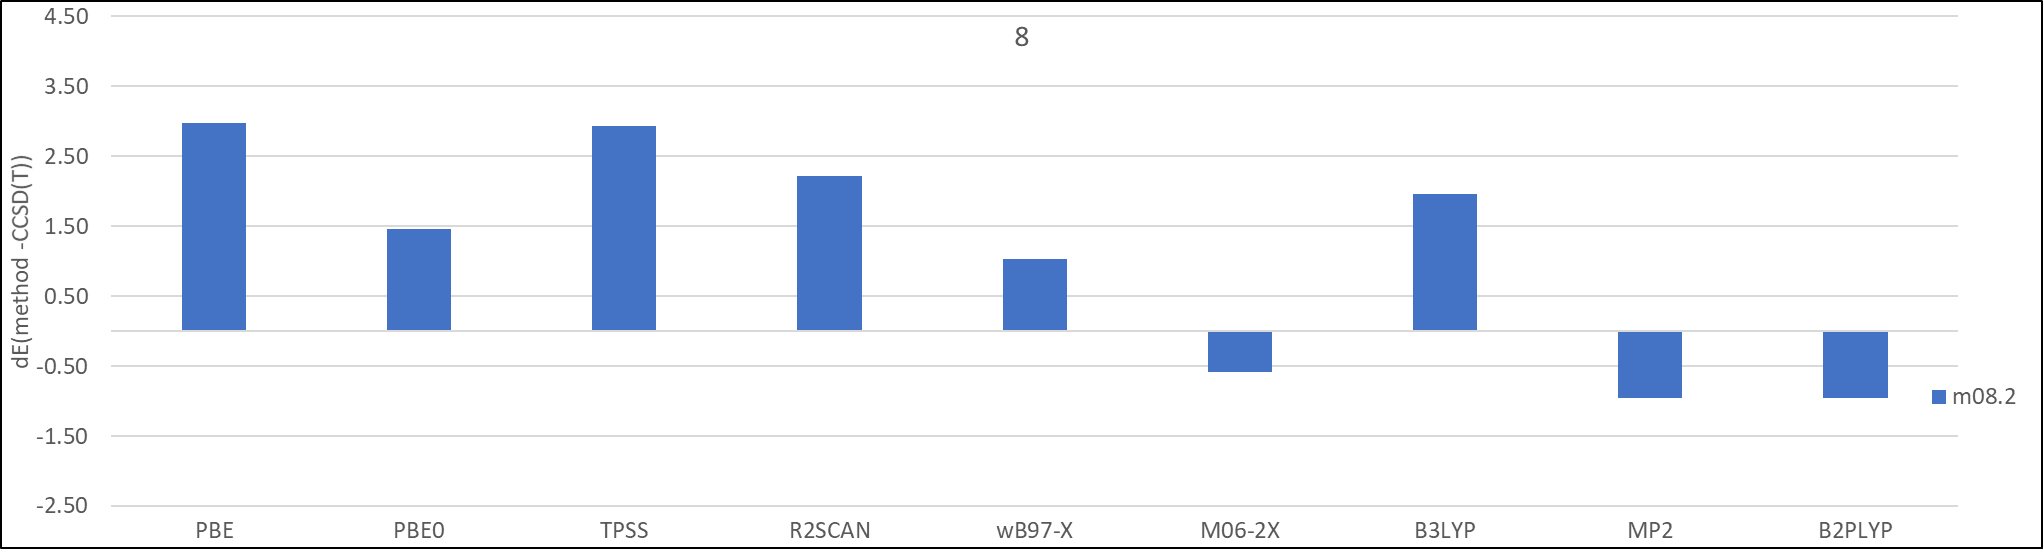


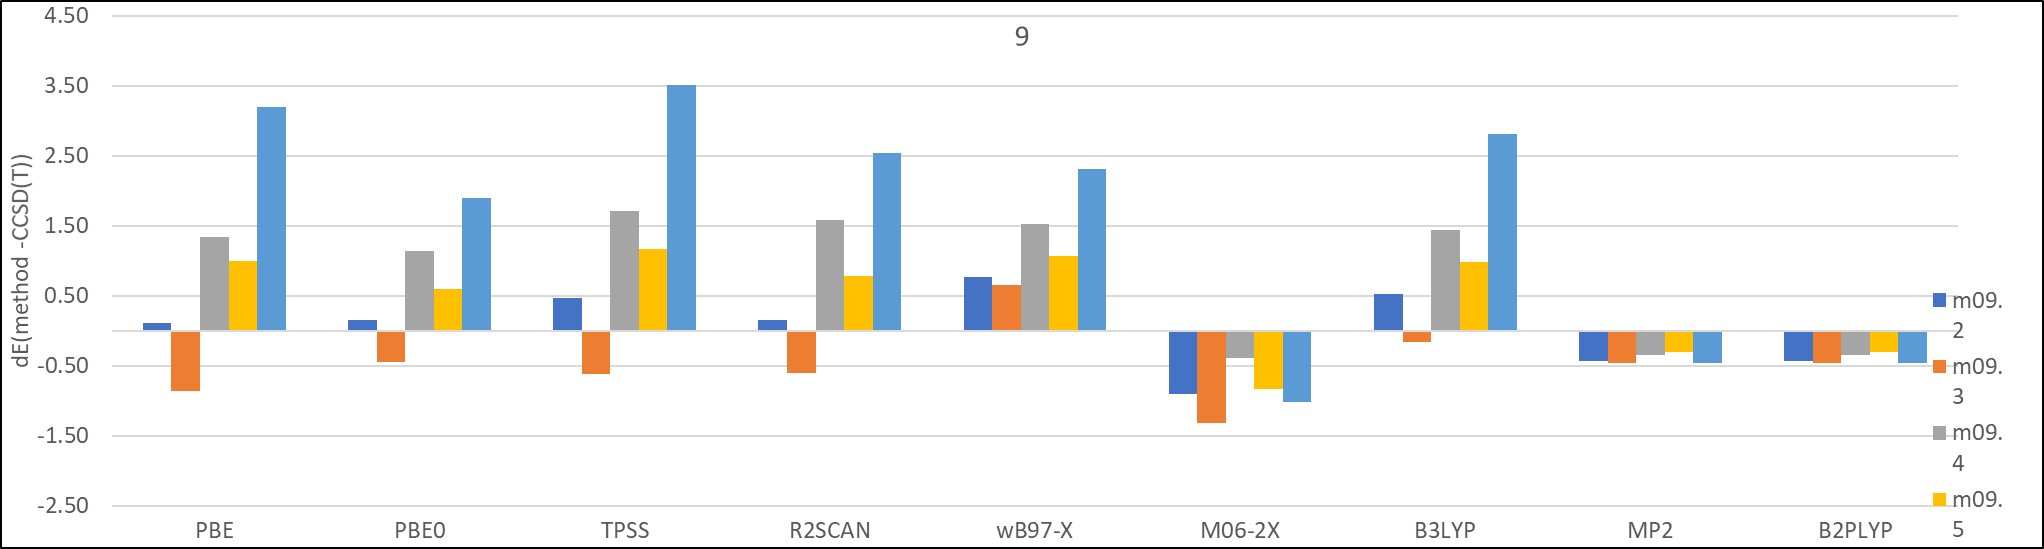


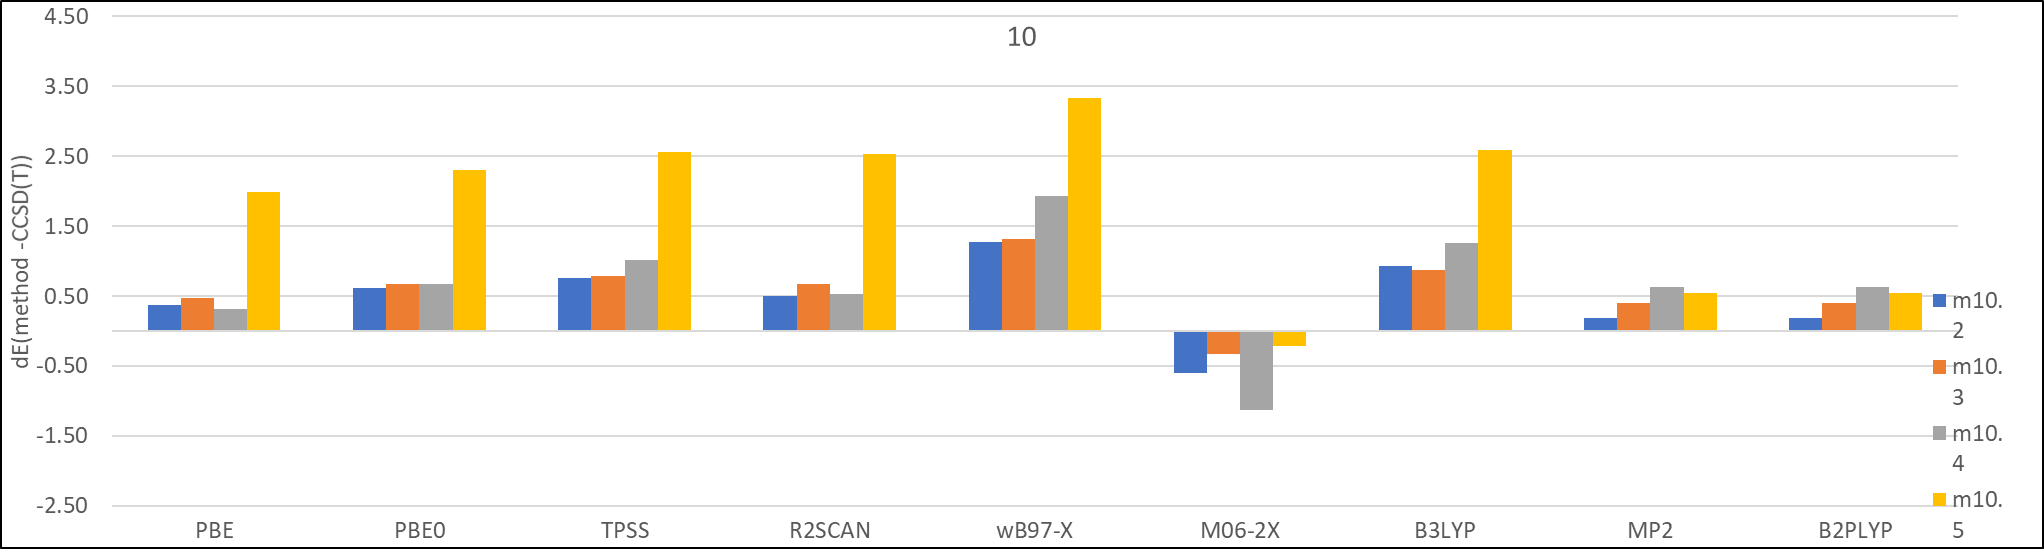


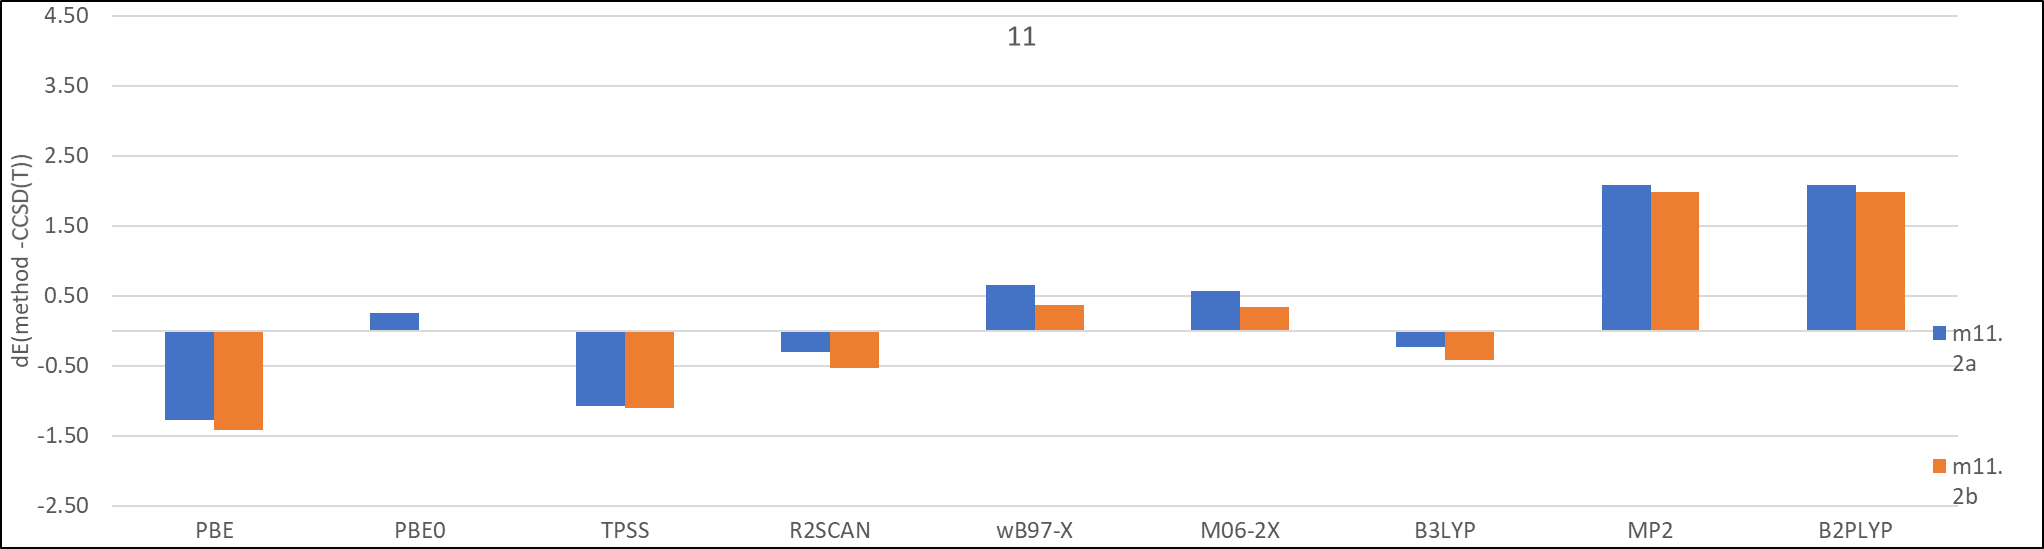


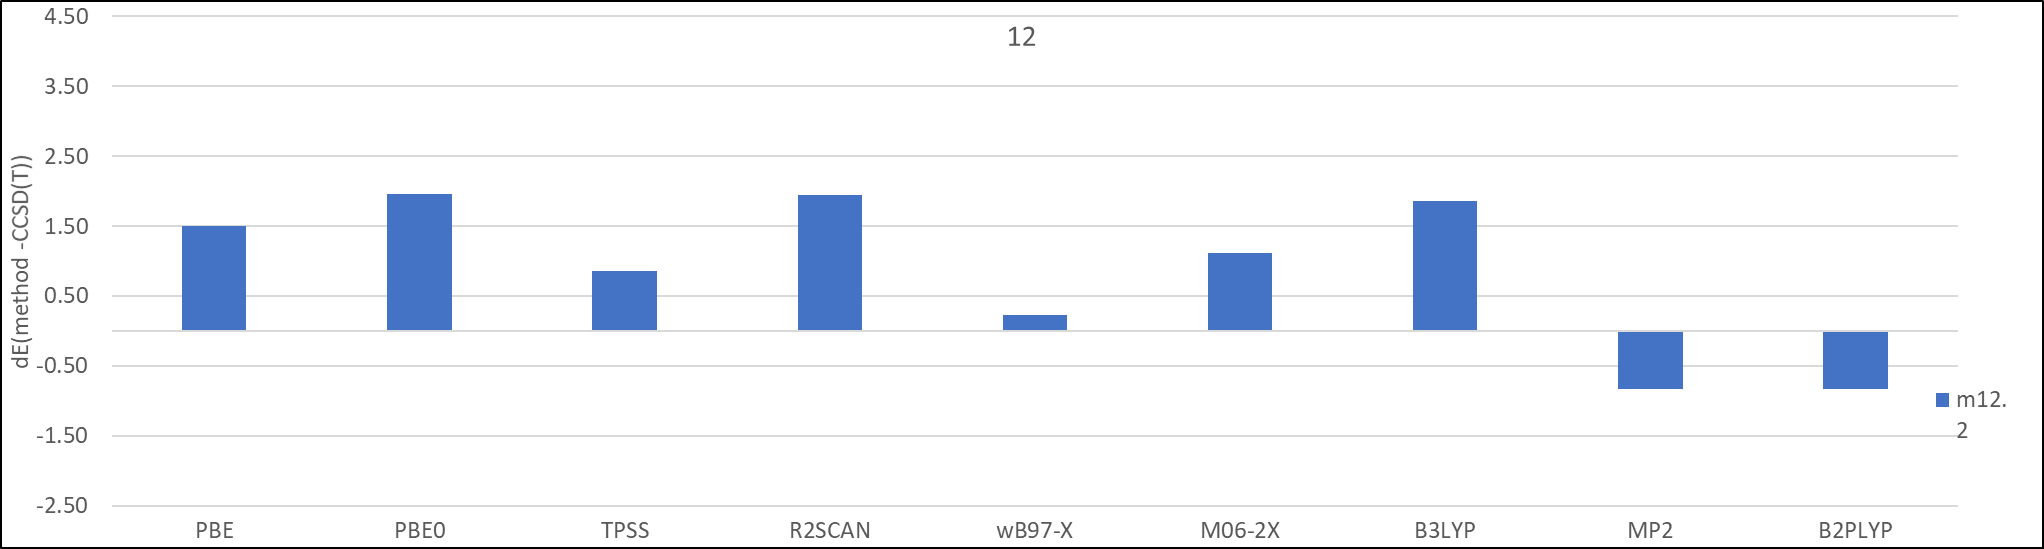


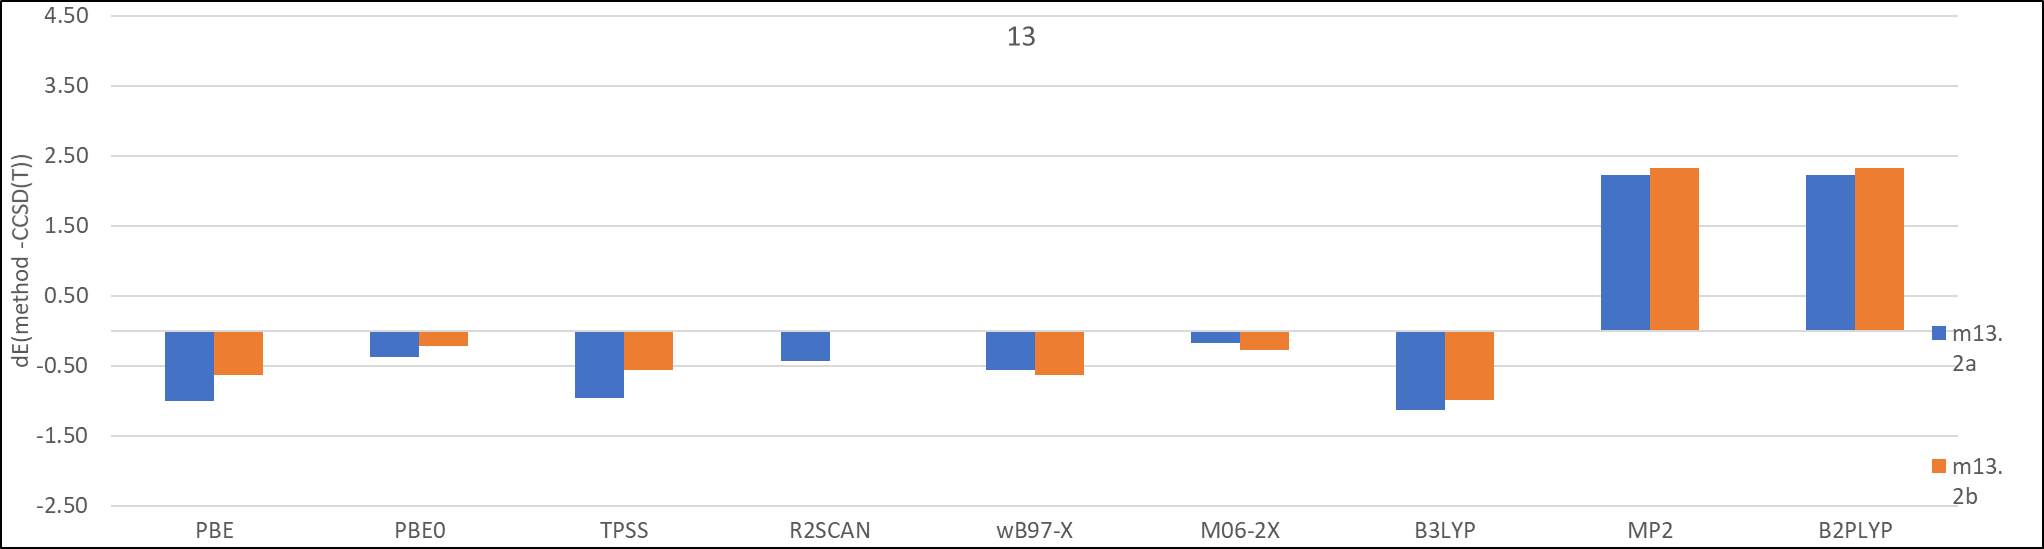


Figure S4: Gas-phase tautomer state energy differences in kcal/mol relative to CCSD(T) energy differences for each state for each density functional method and MP2 for calculations (Note that y-axis scales are different for the plots).


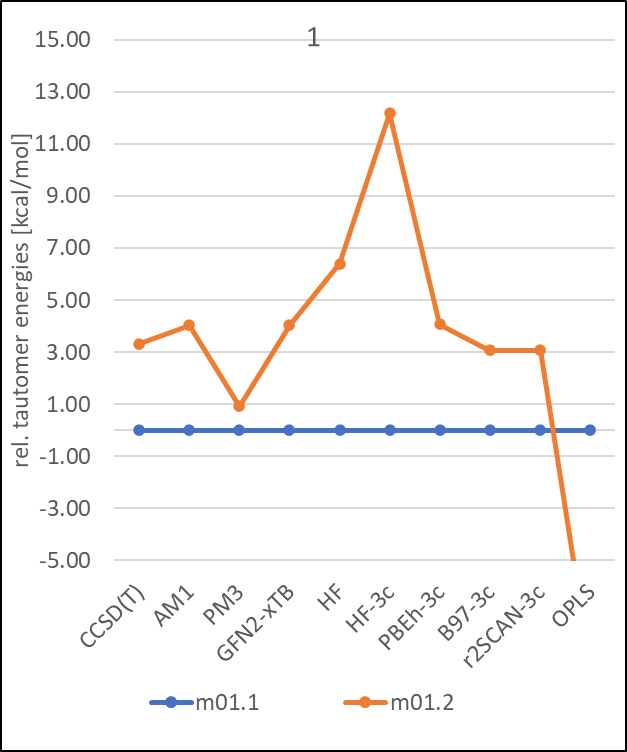

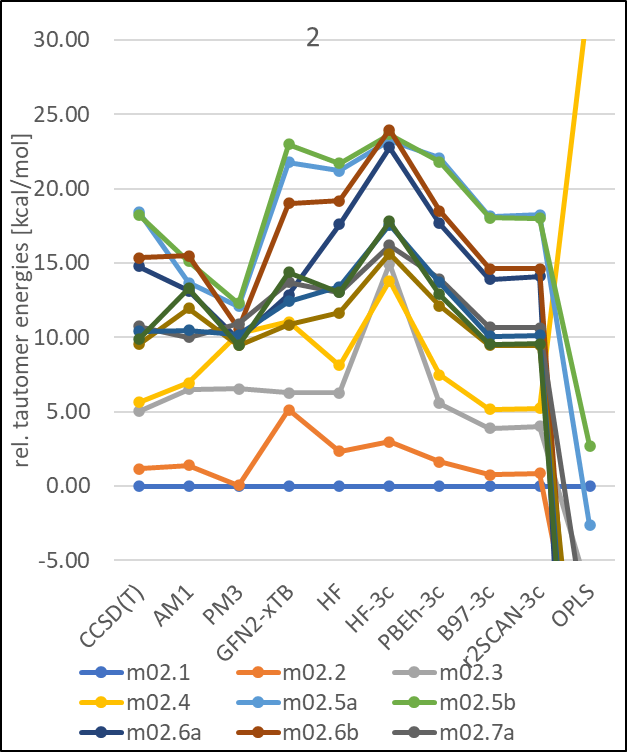

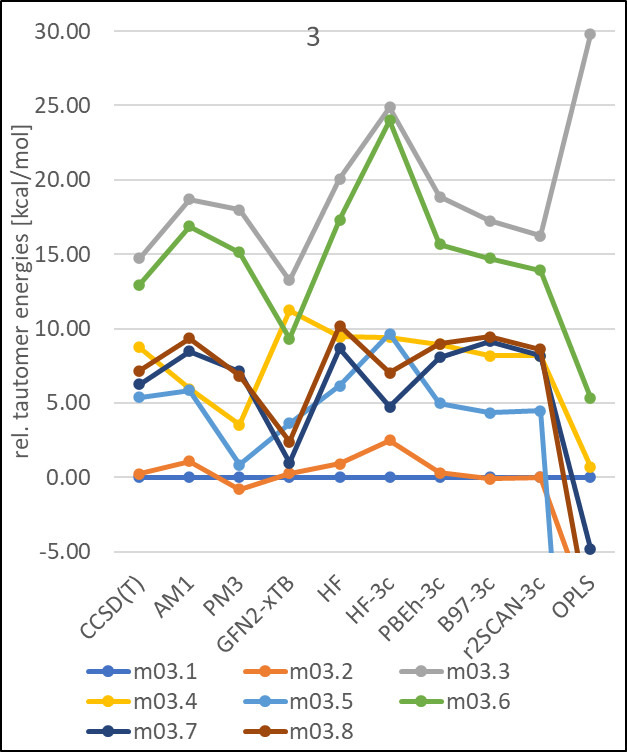


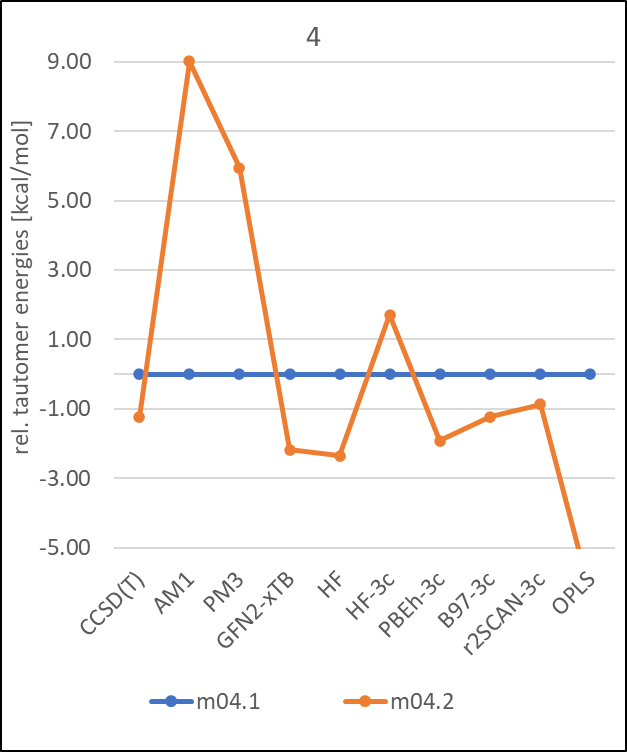

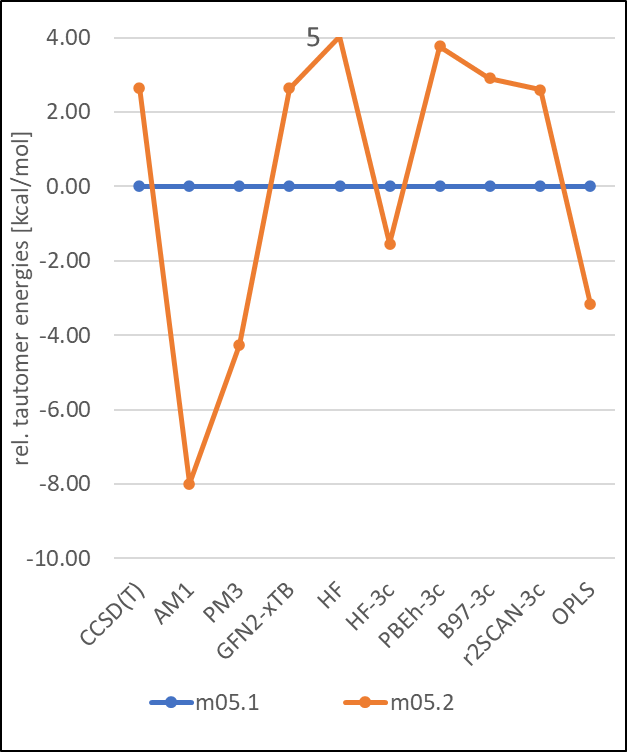

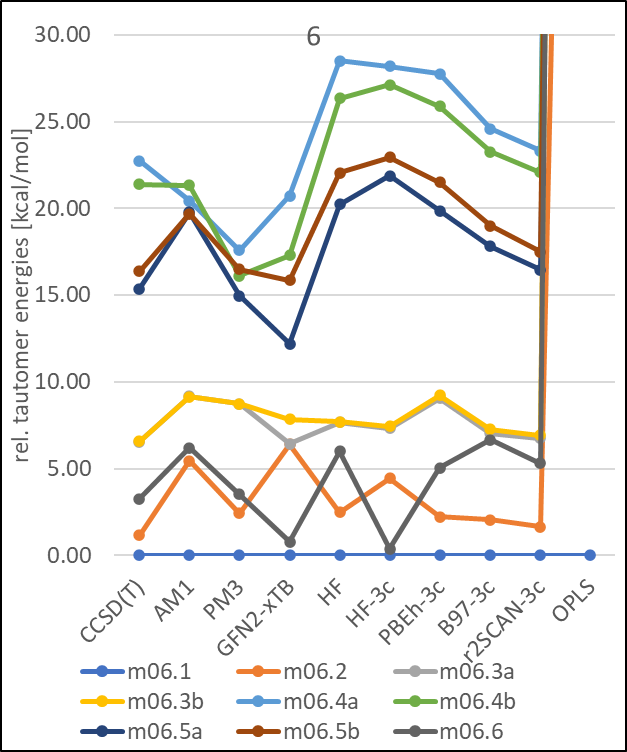


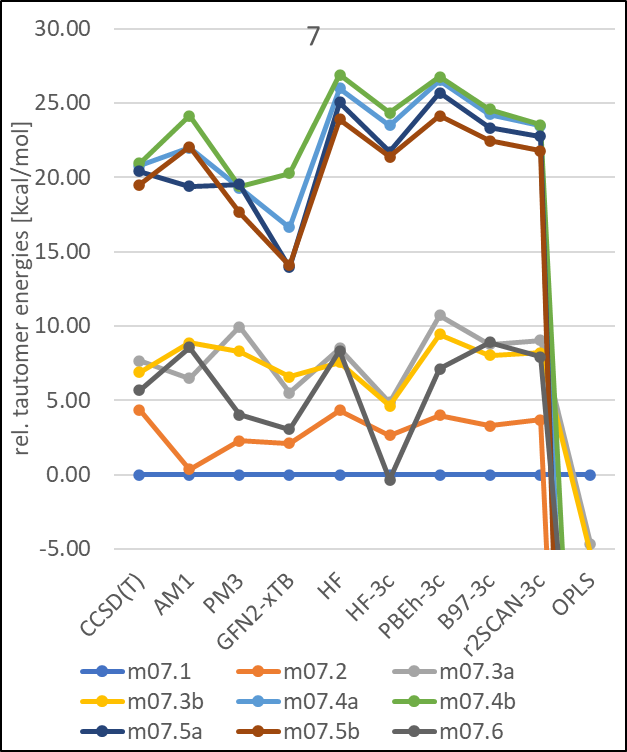

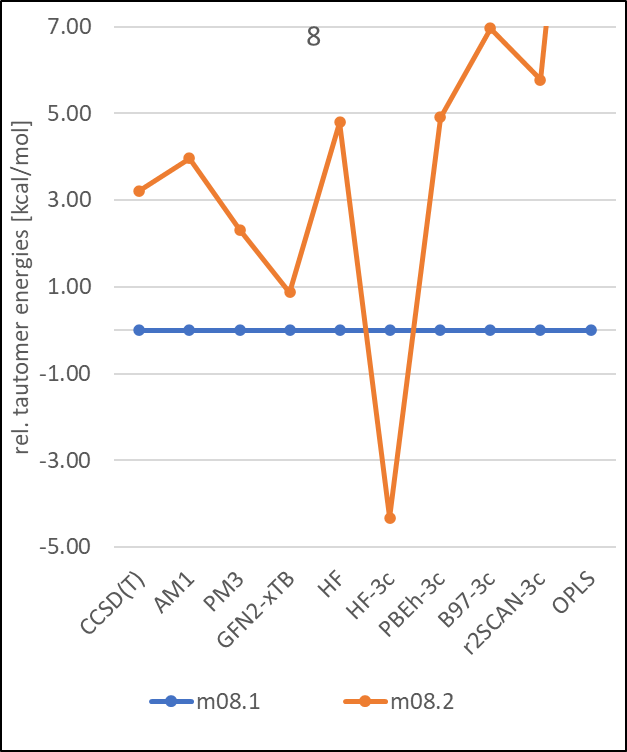

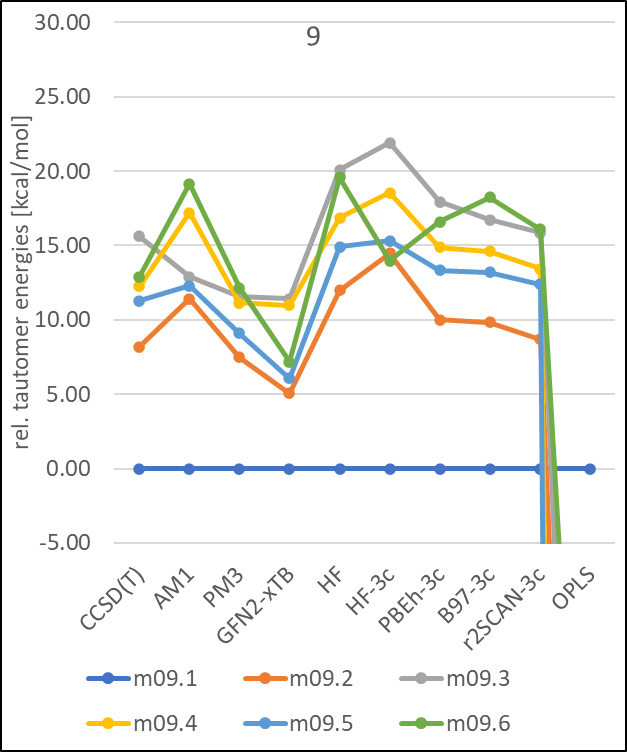


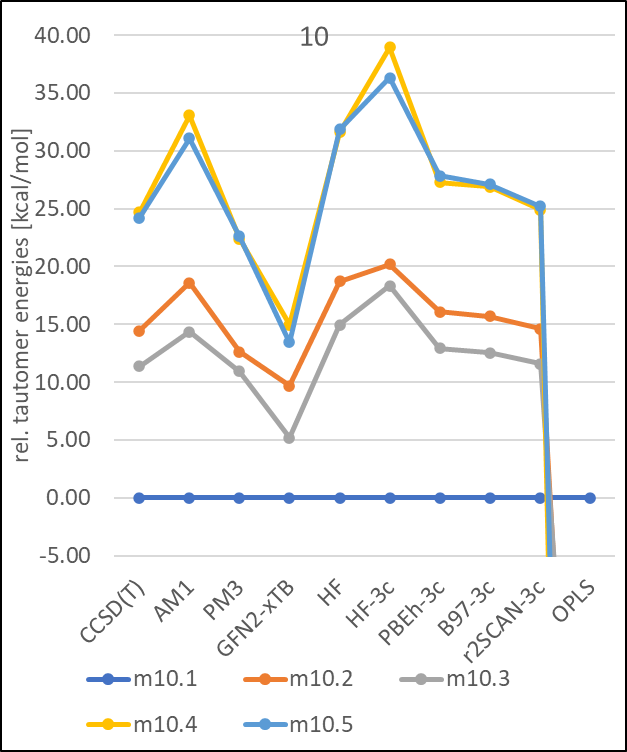

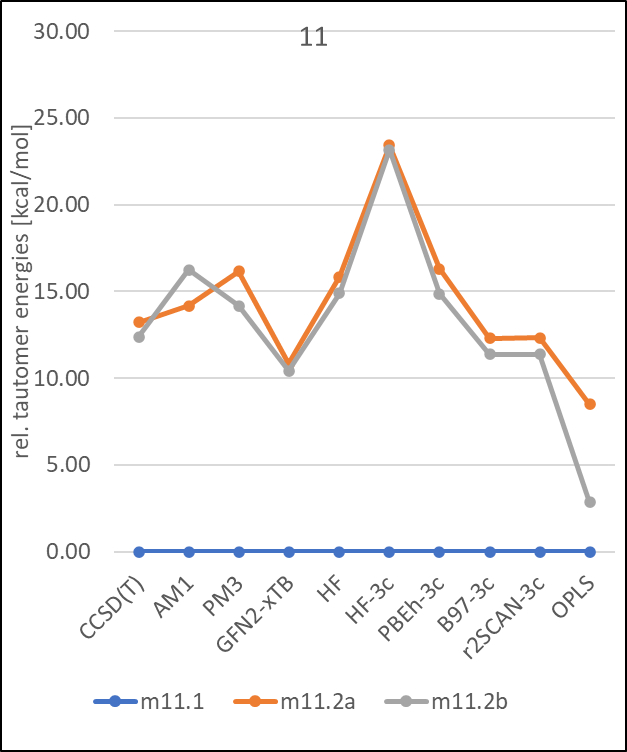

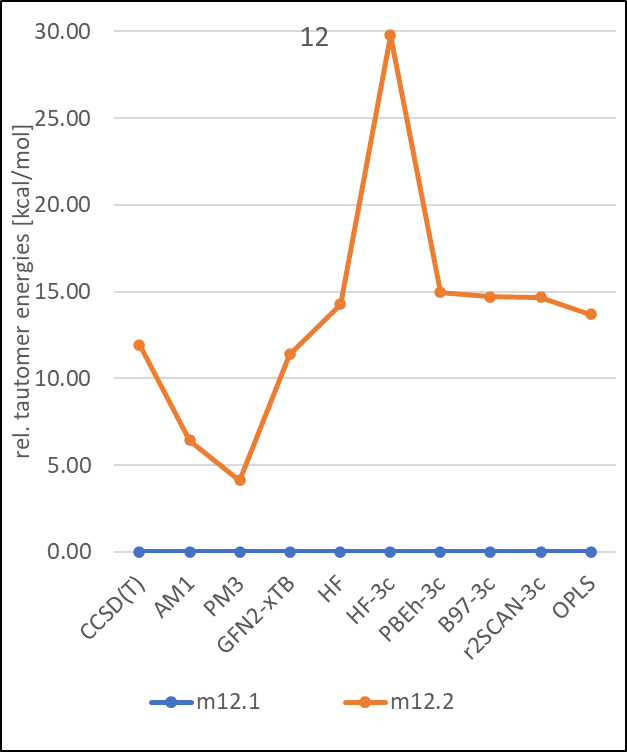


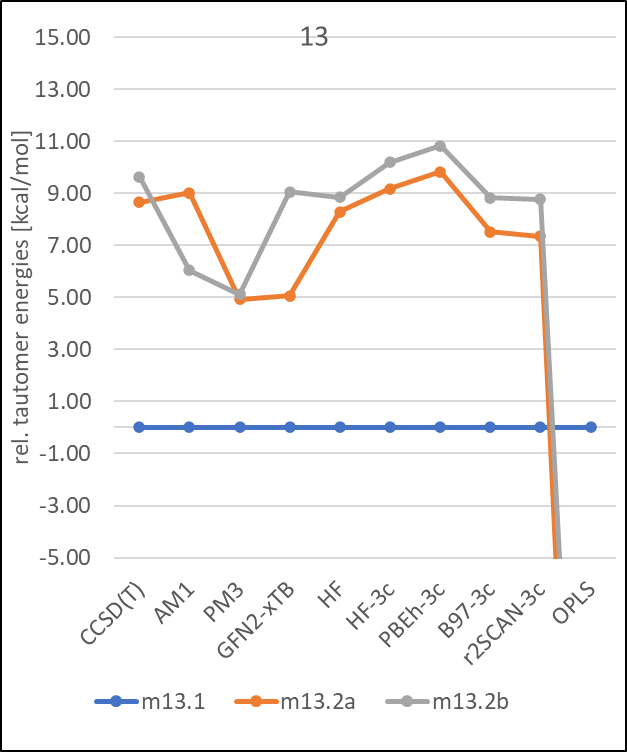


Figure S5: Comparison of tautomer state energies in kcal/mol calculated with CCSD(T), HF, semiempirical, cost-optimized DFT and all-atom force-field OPLS4 for the 13 molecules with different method default solvent models (see Methods for details).


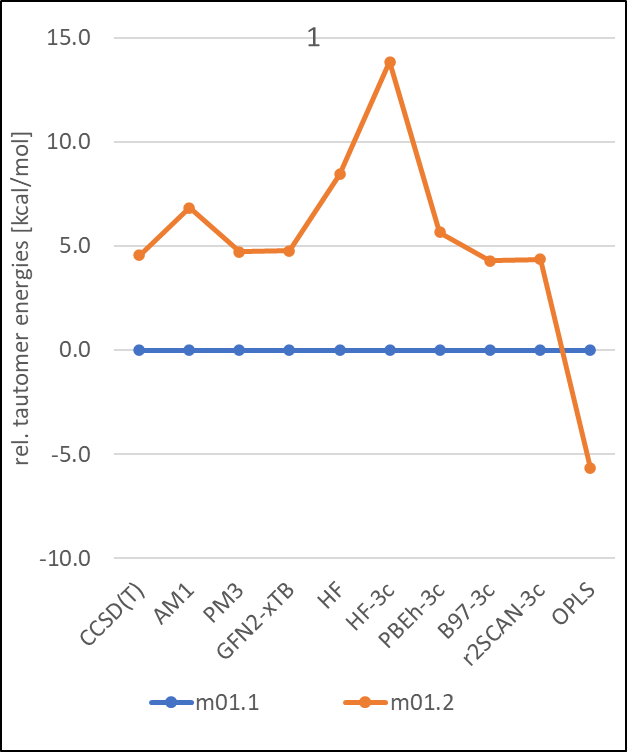

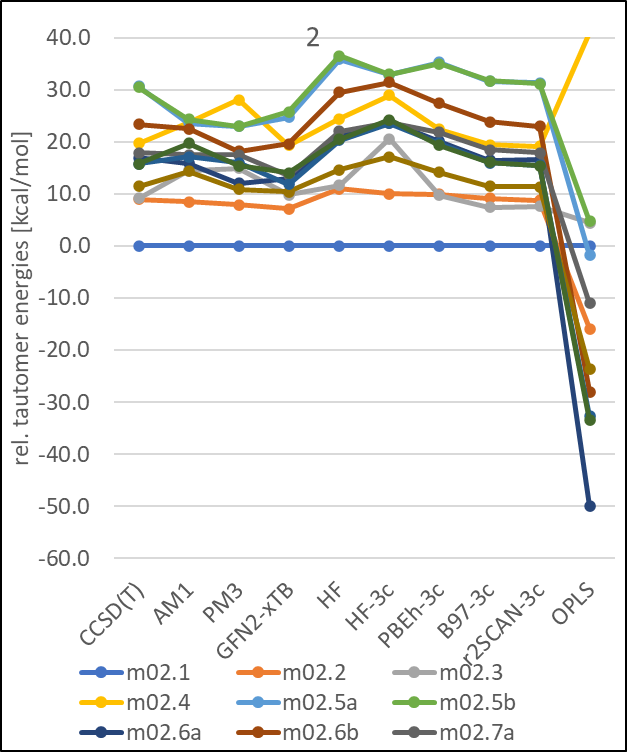

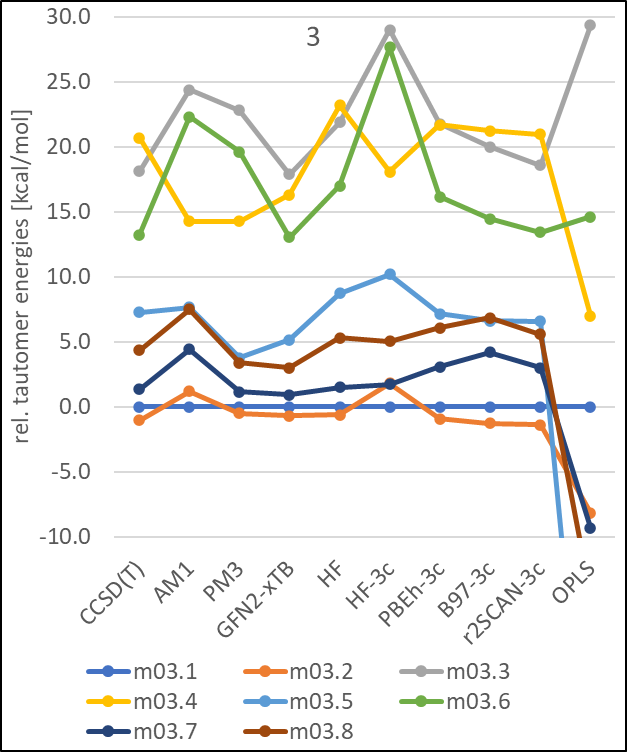


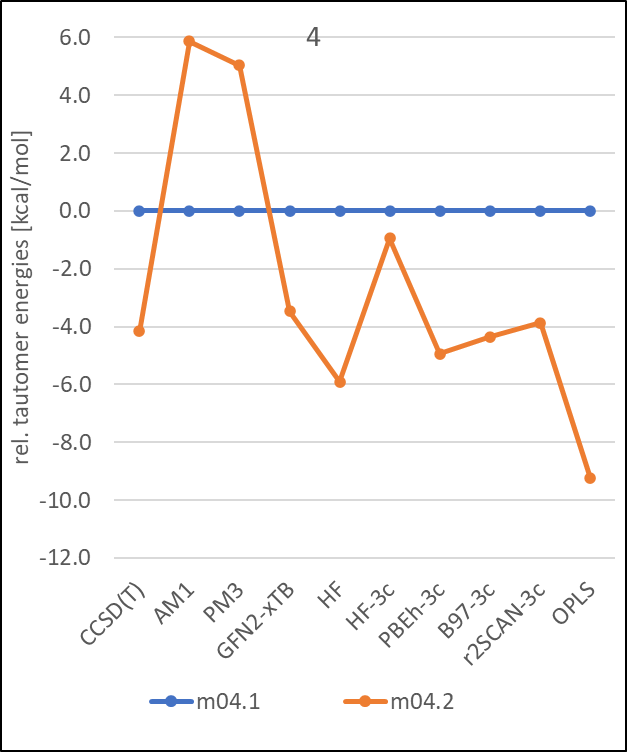

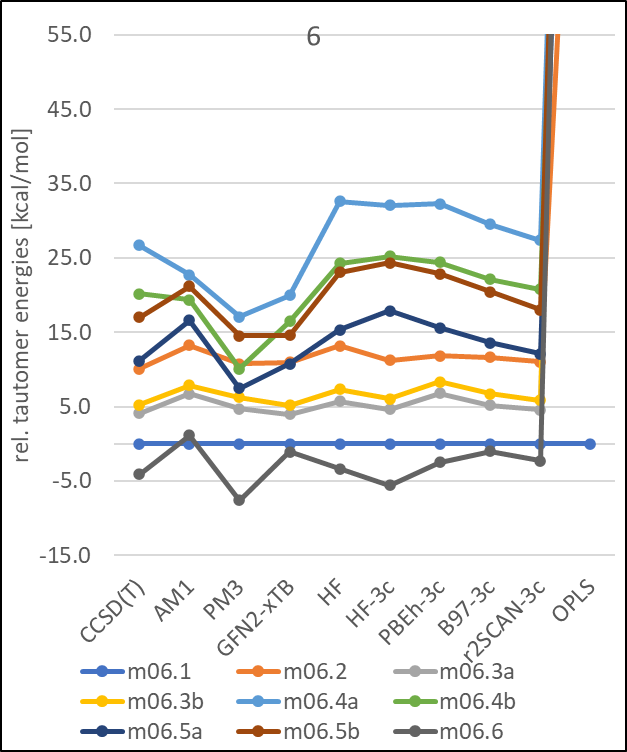

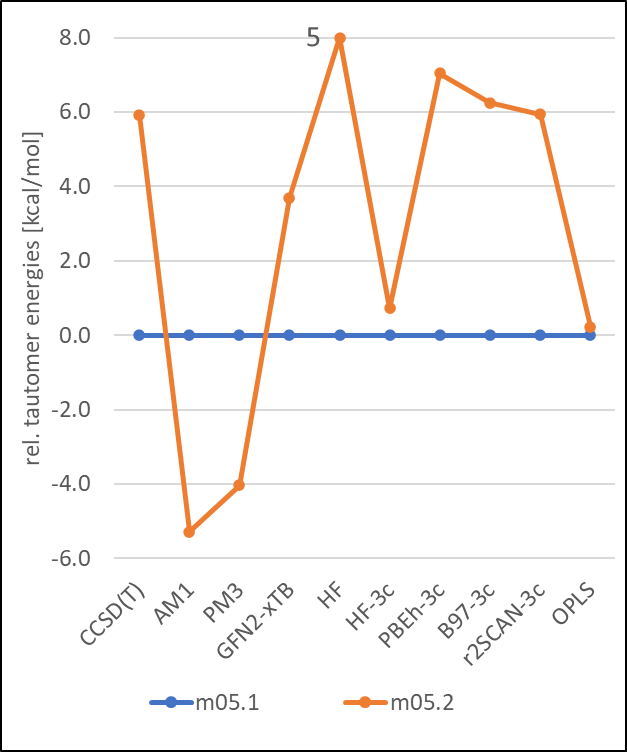


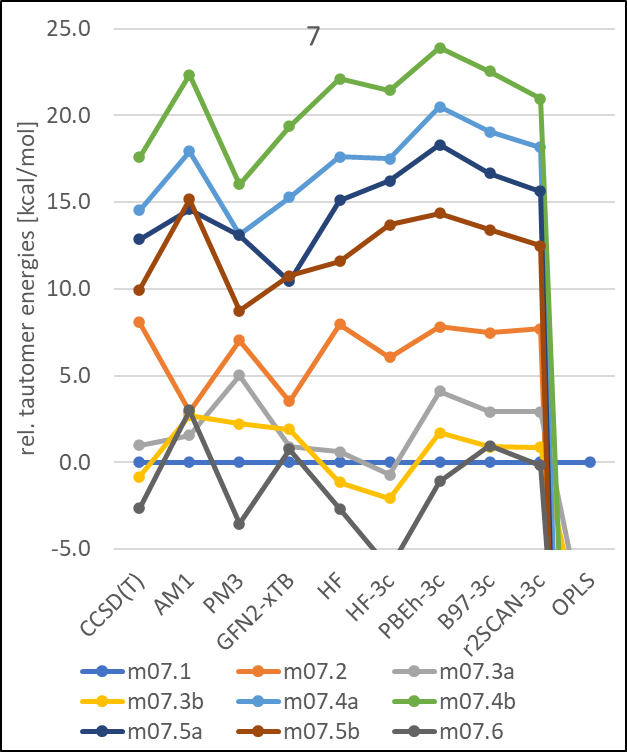

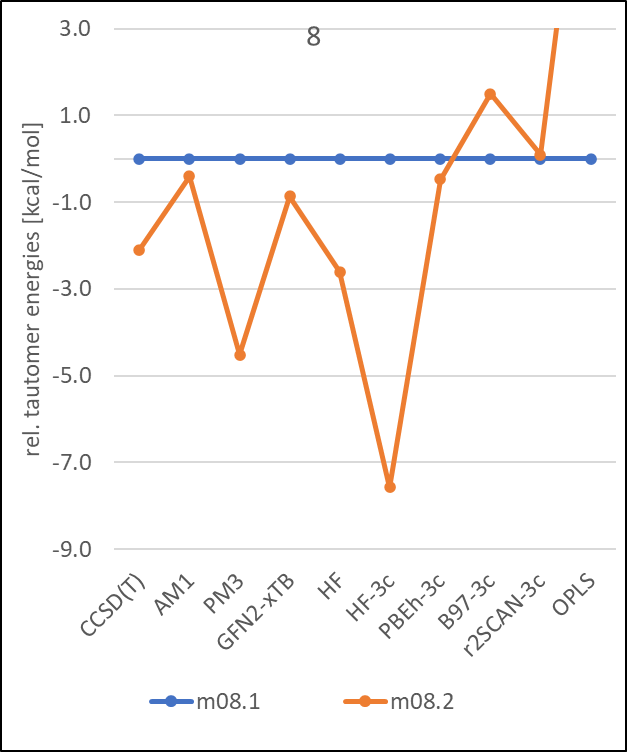

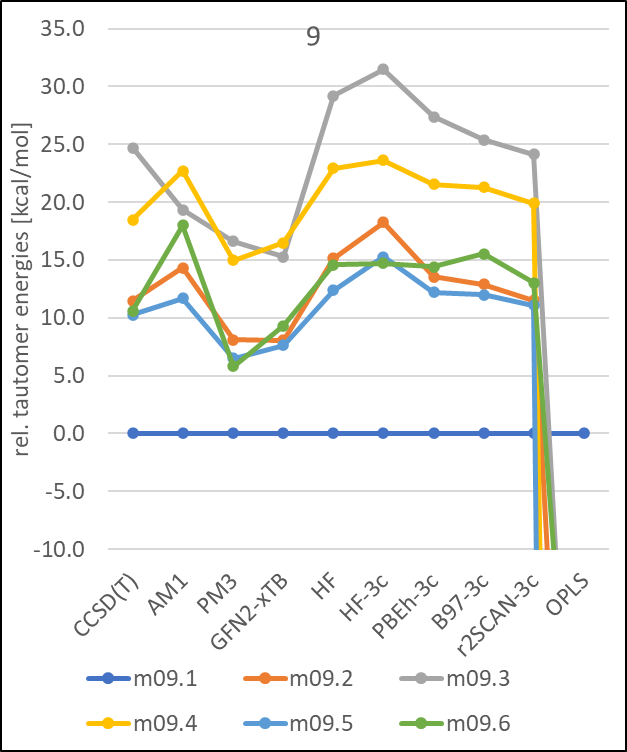


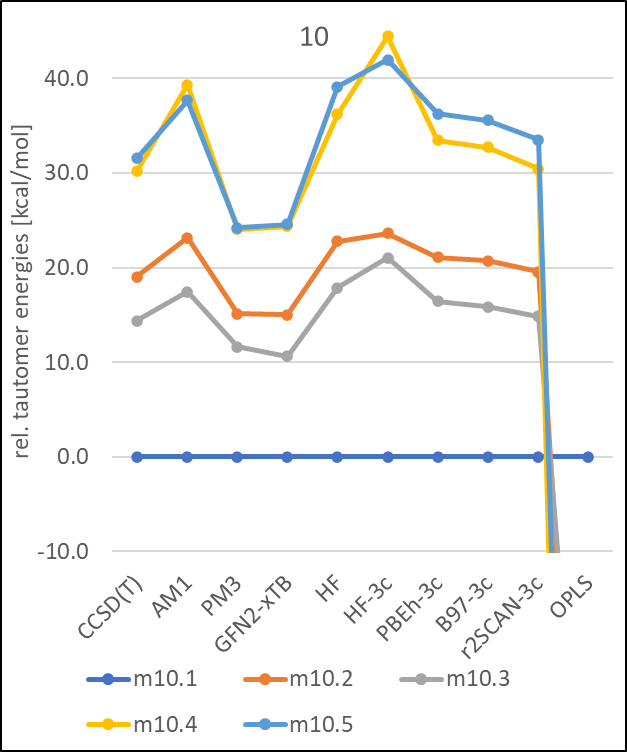

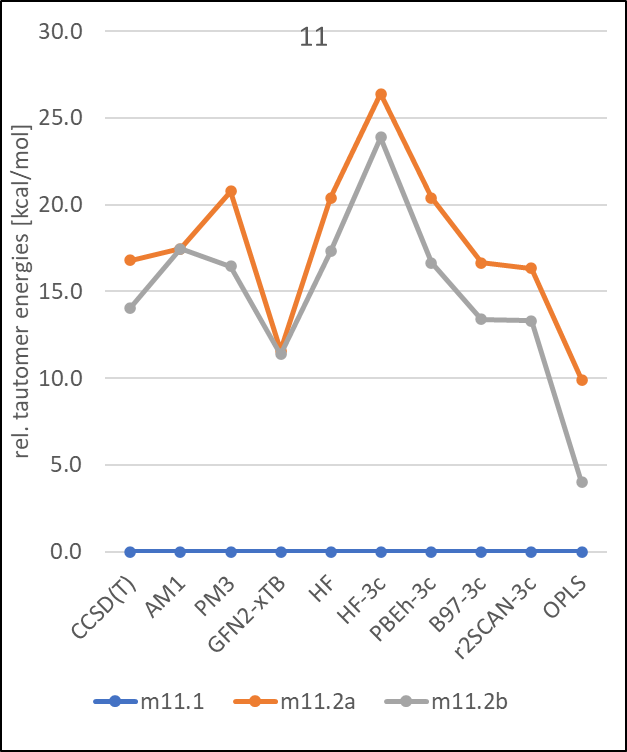

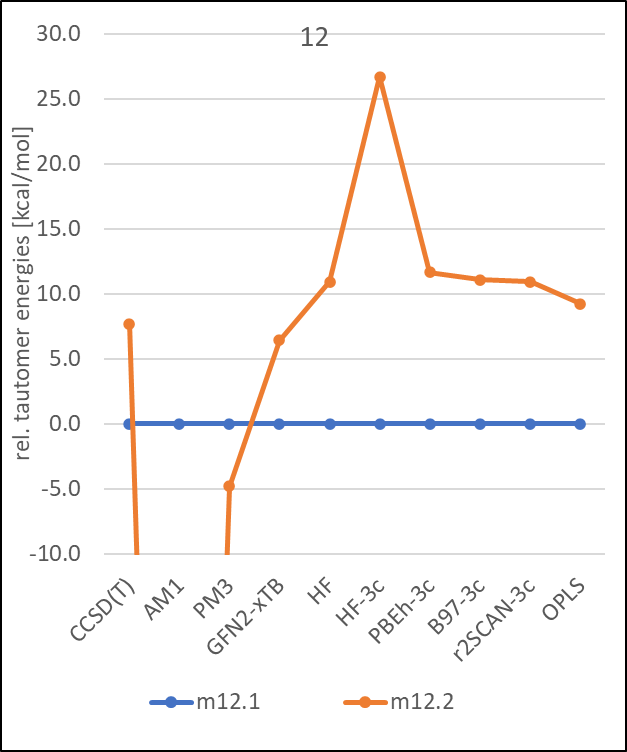

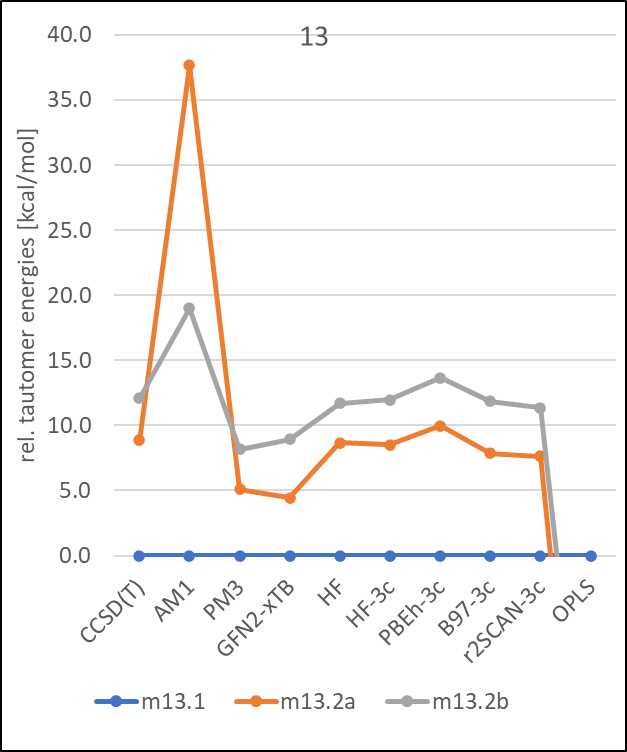


Figure S6: Comparison of tautomer state energies in kcal/mol calculated with CCSD(T), HF, semiempirical, cost-optimized DFT and all-atom force-field OPLS4 for the 13 molecules in gas-phase.


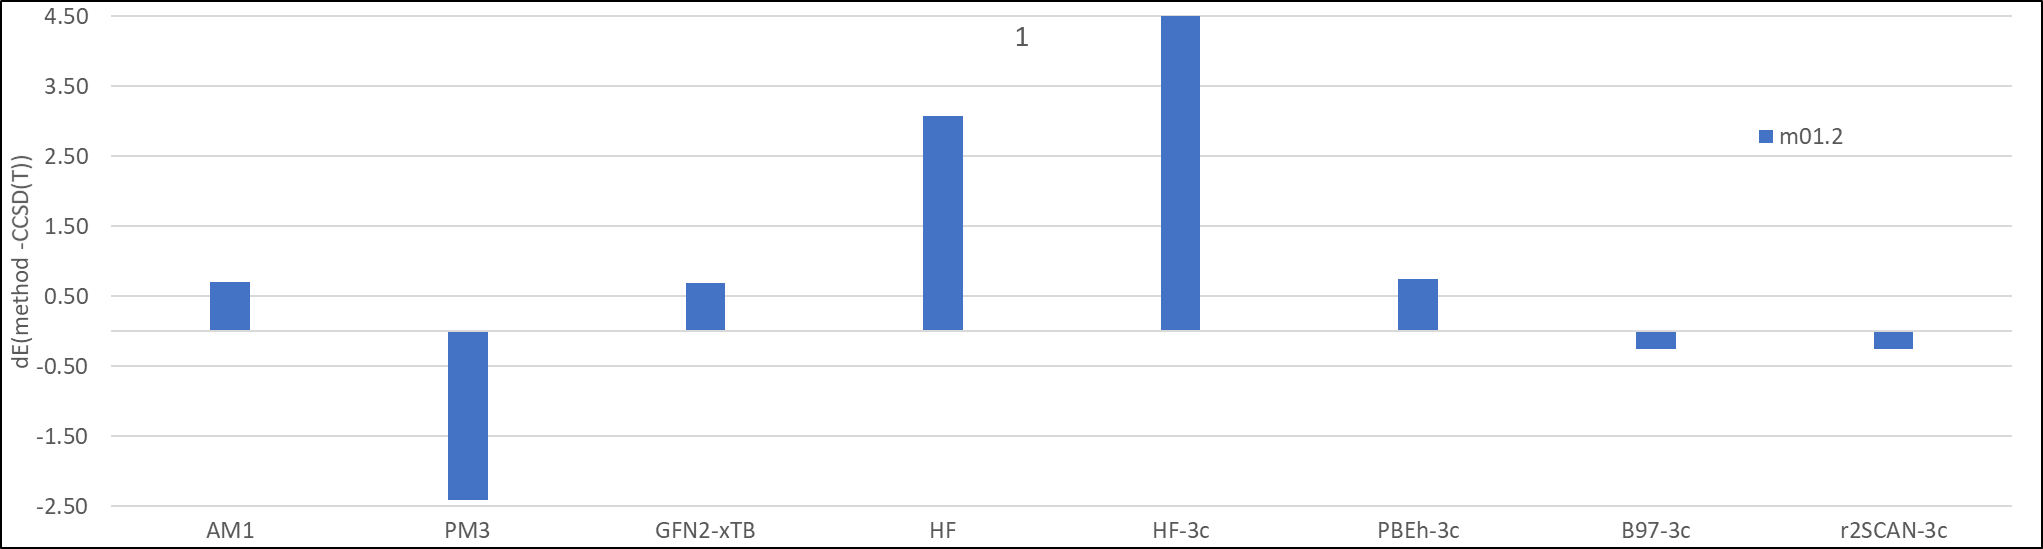


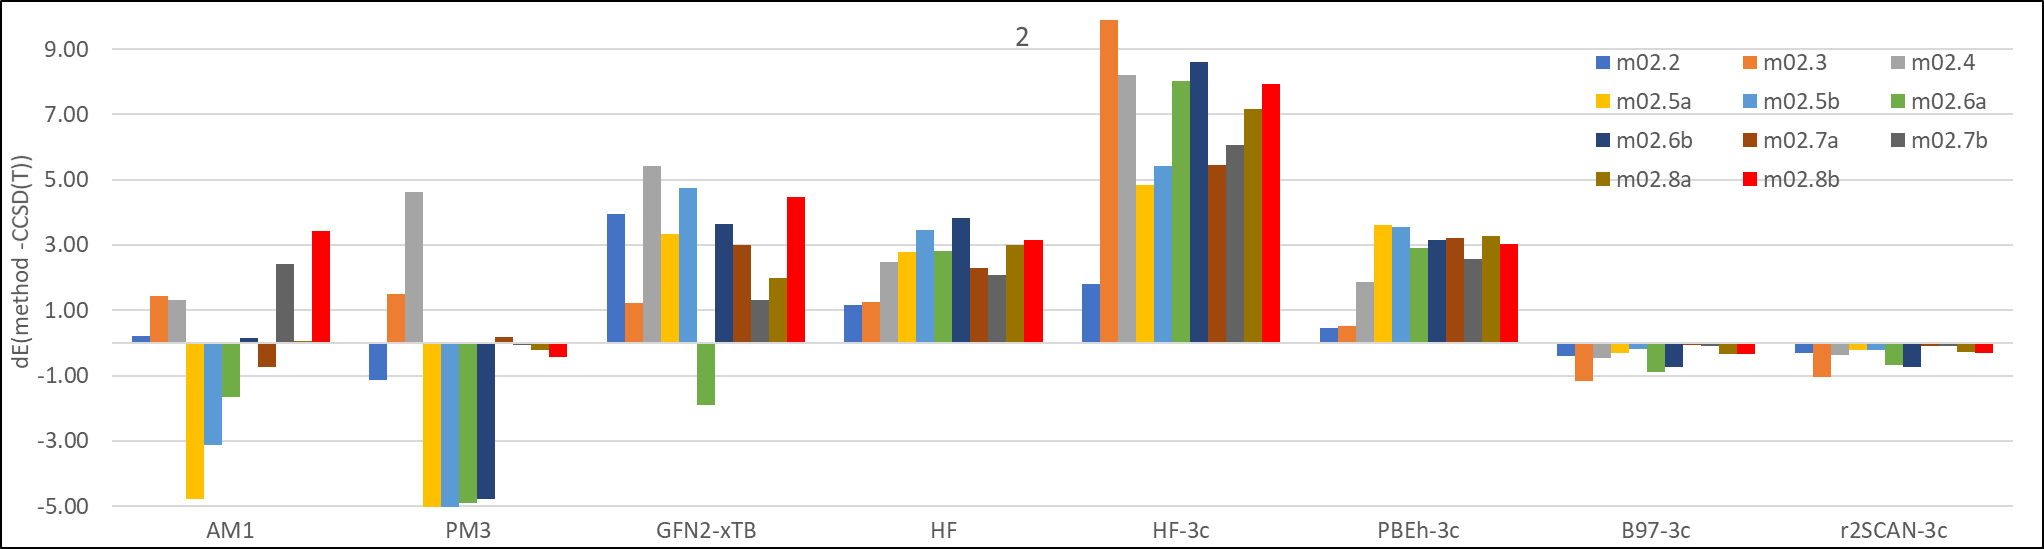


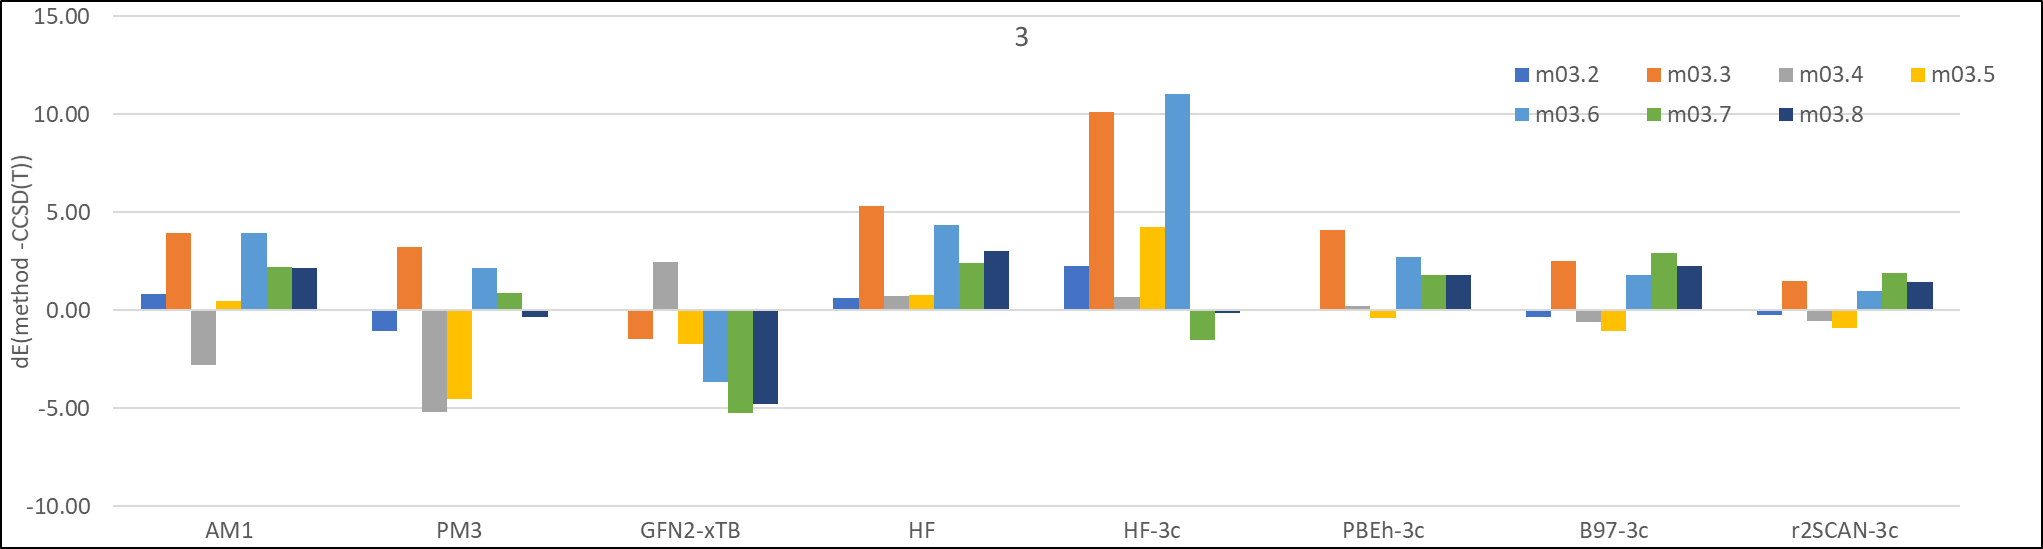


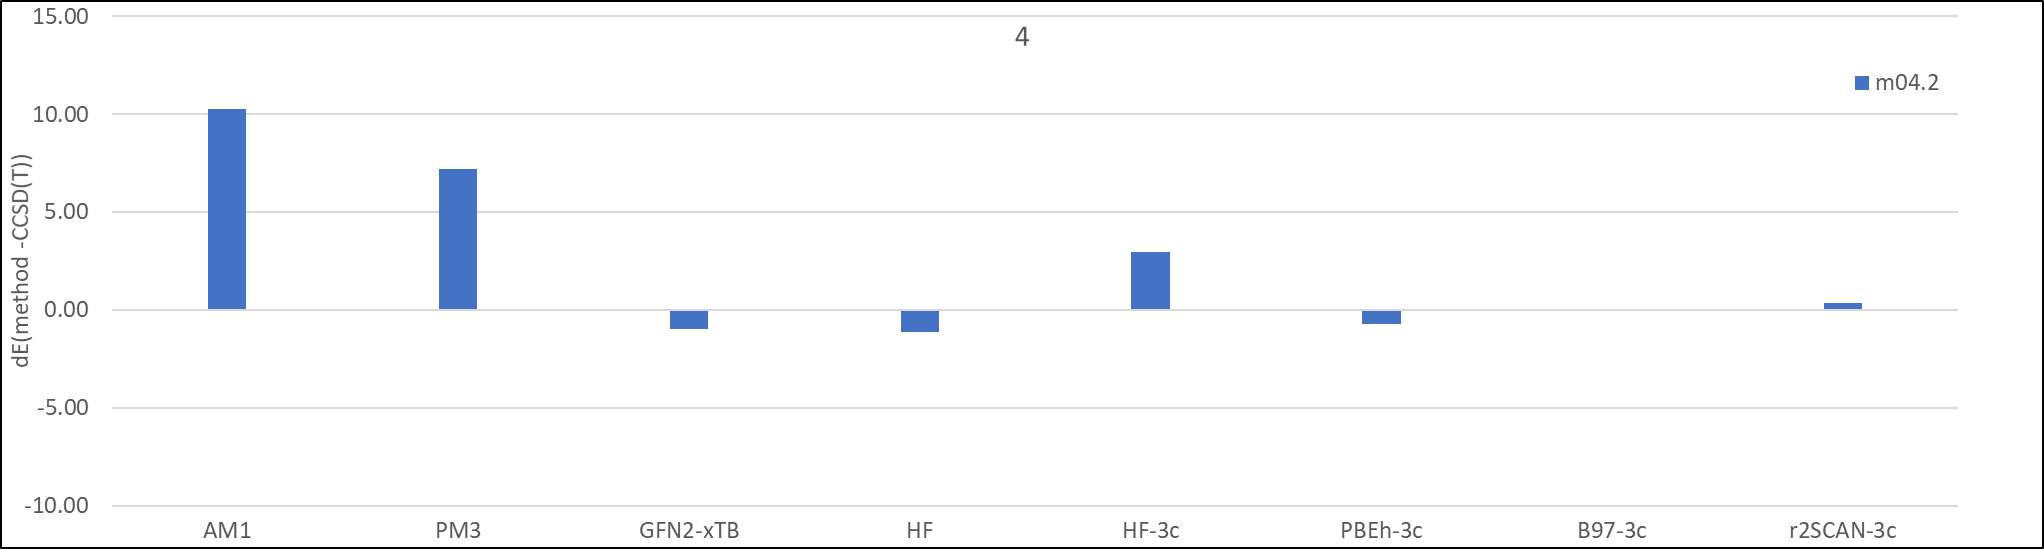


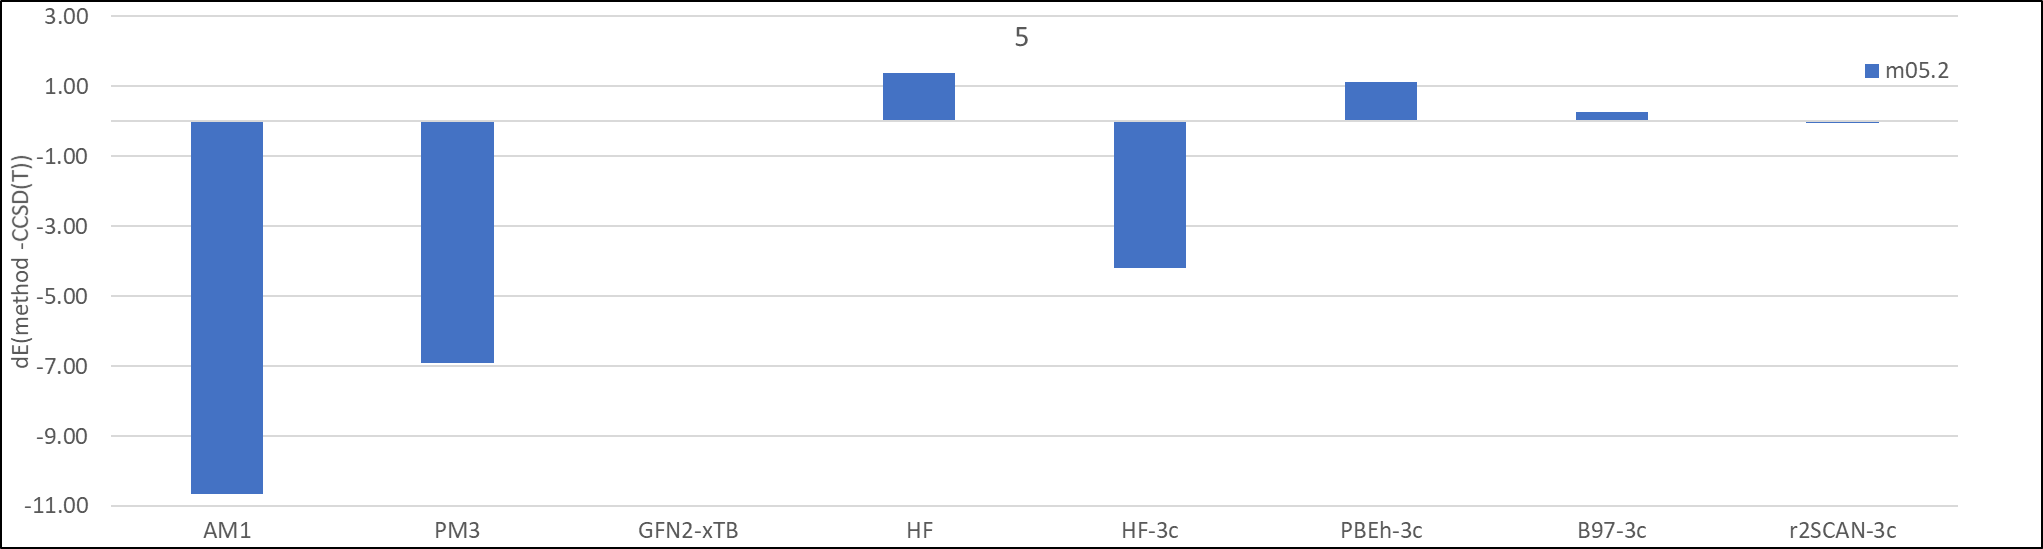


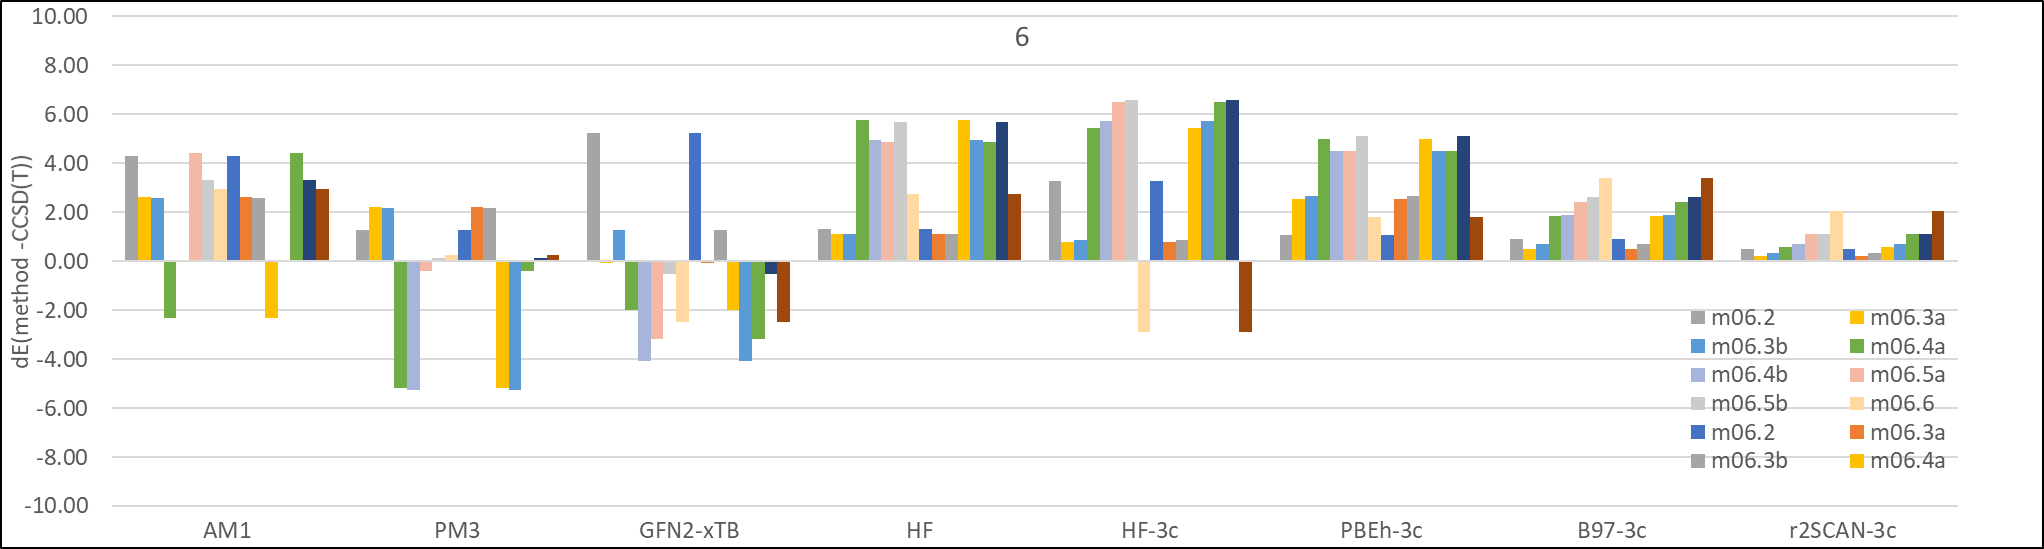


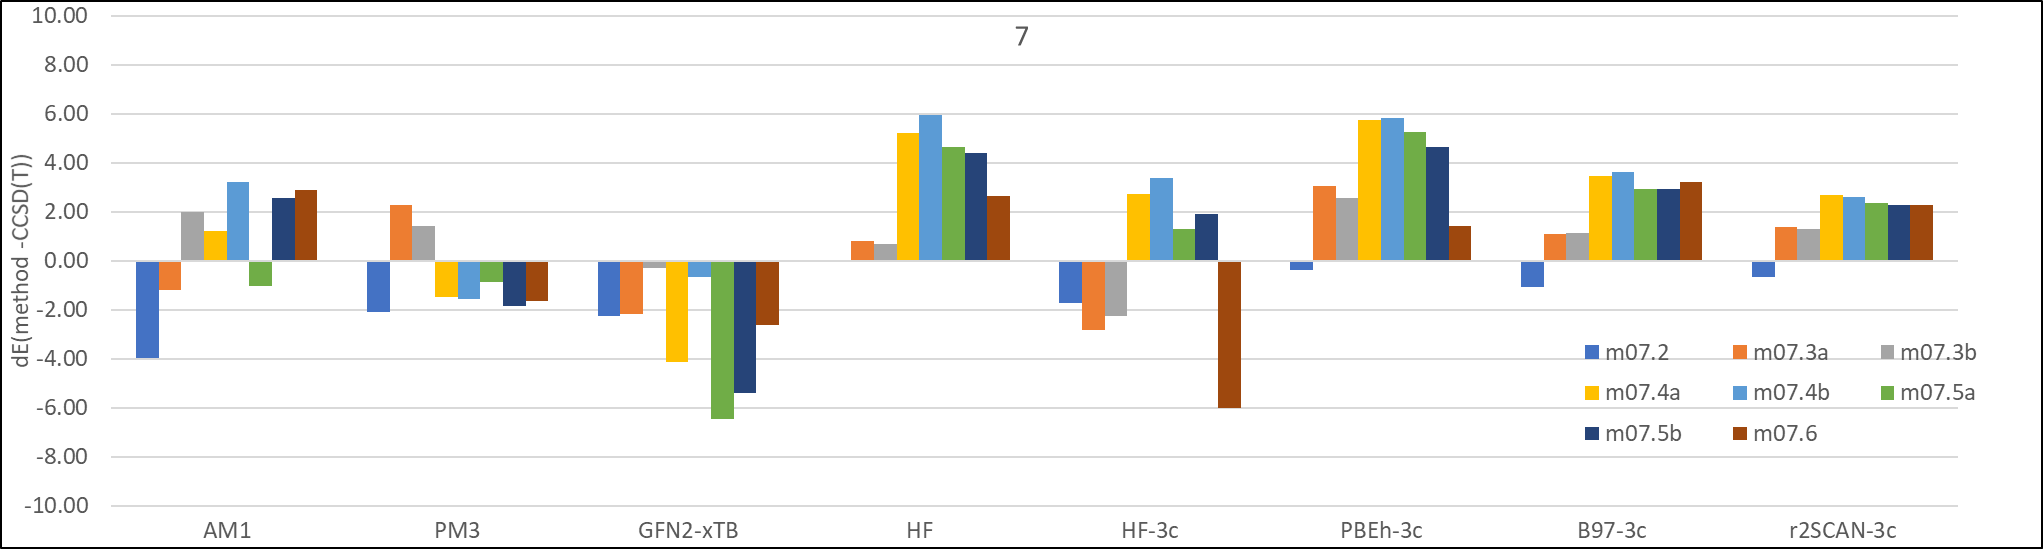


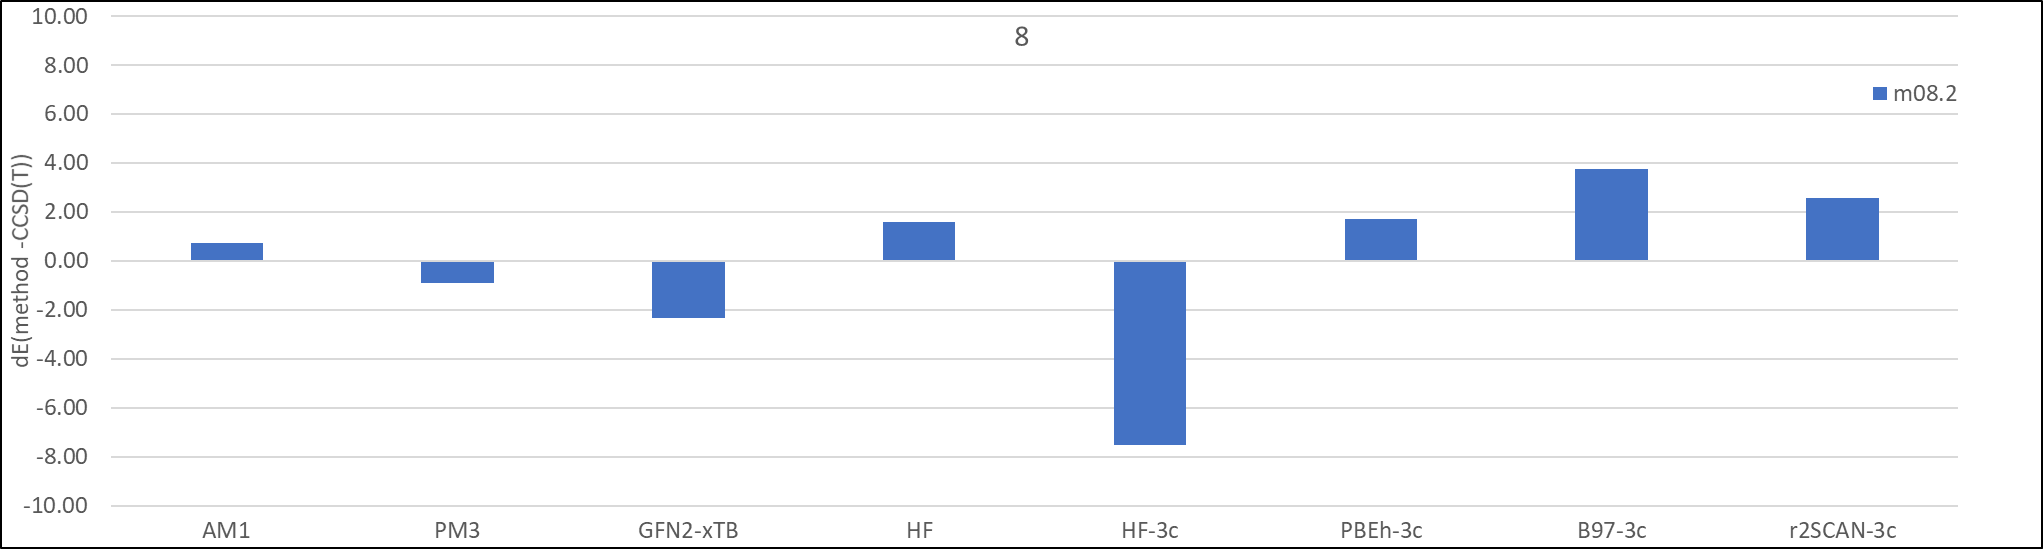


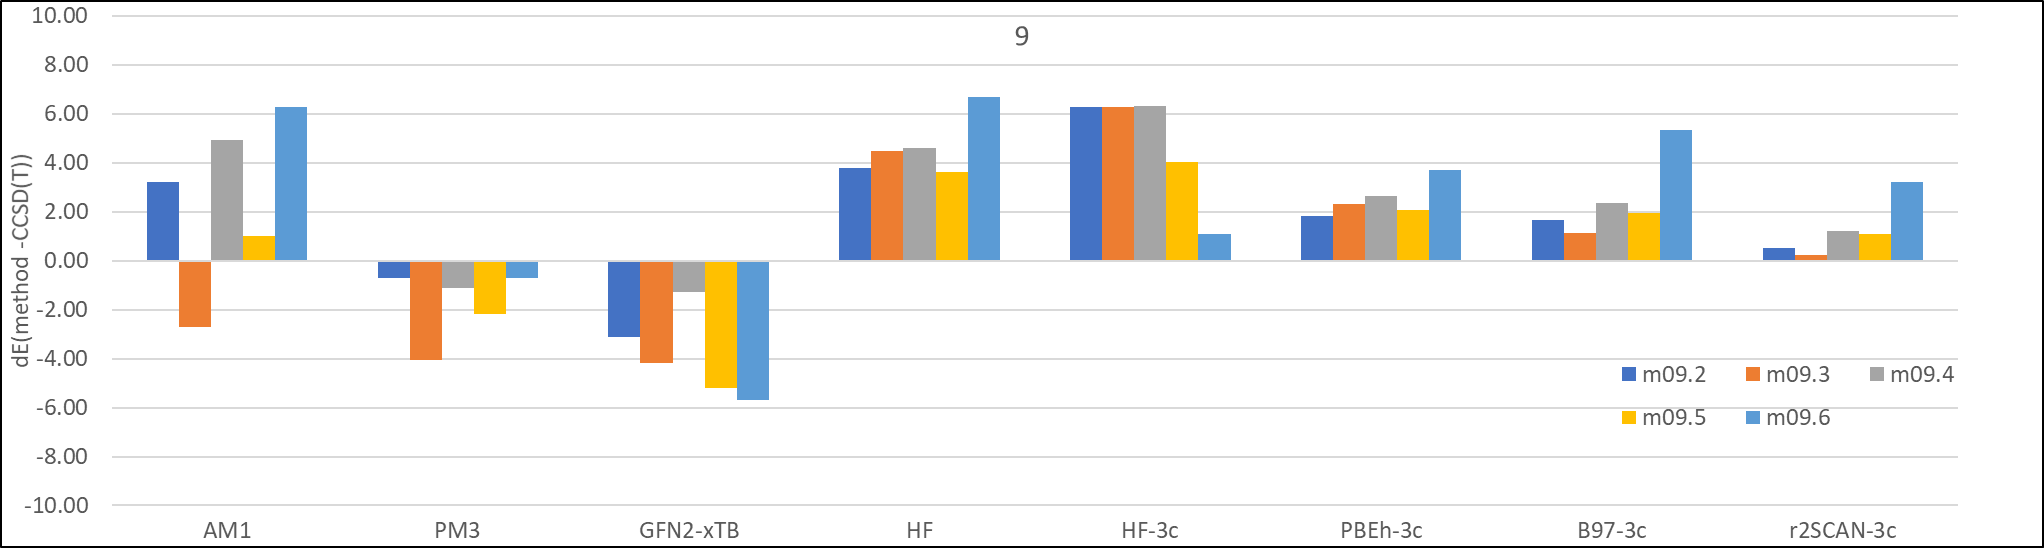


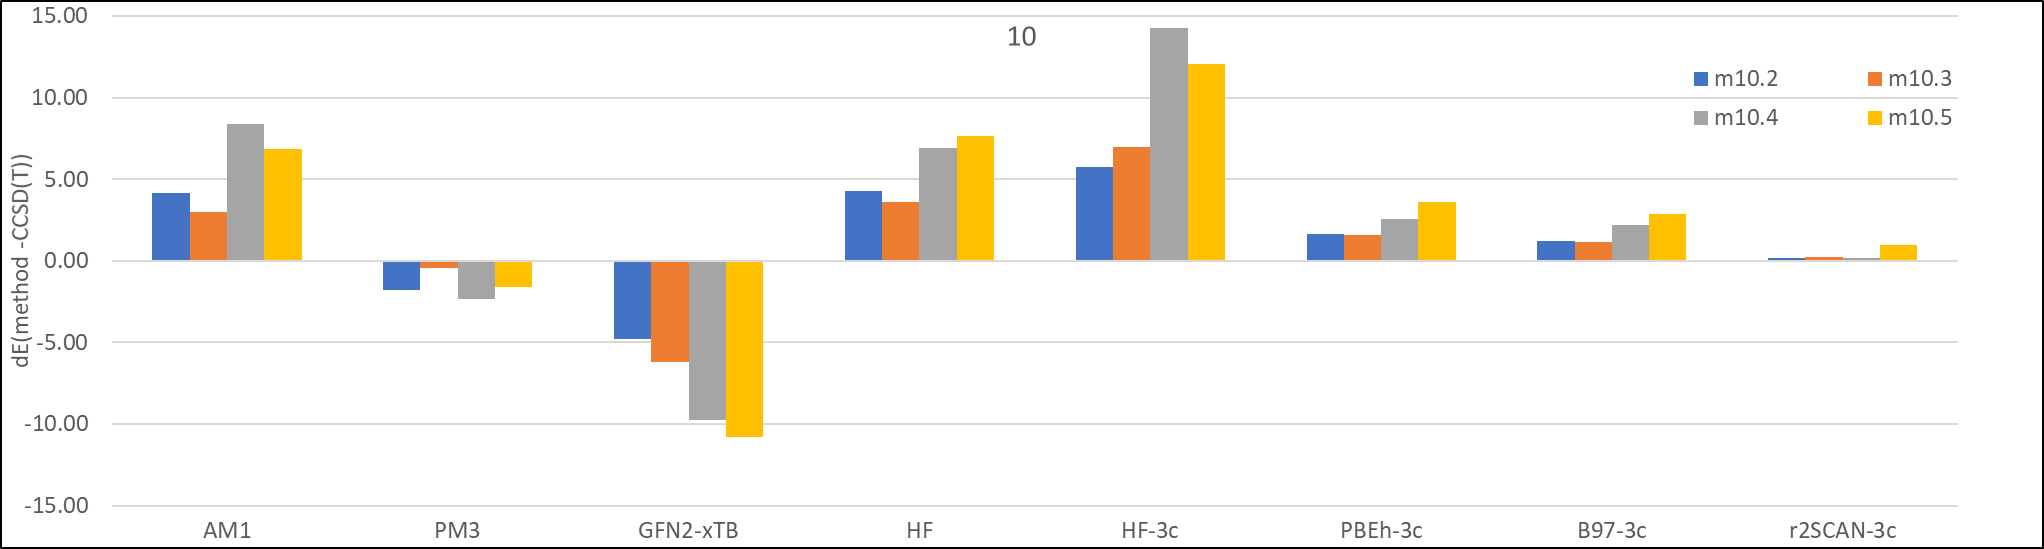


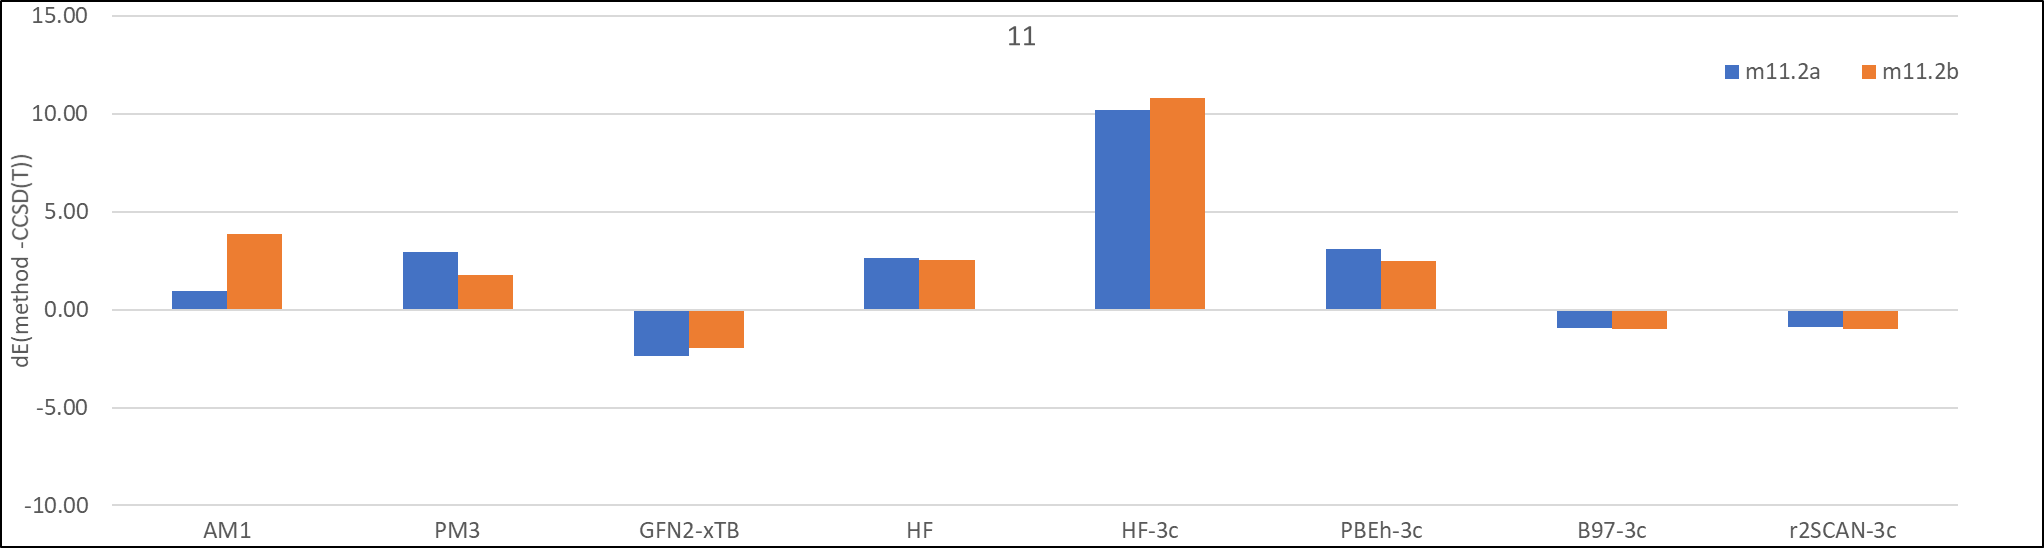


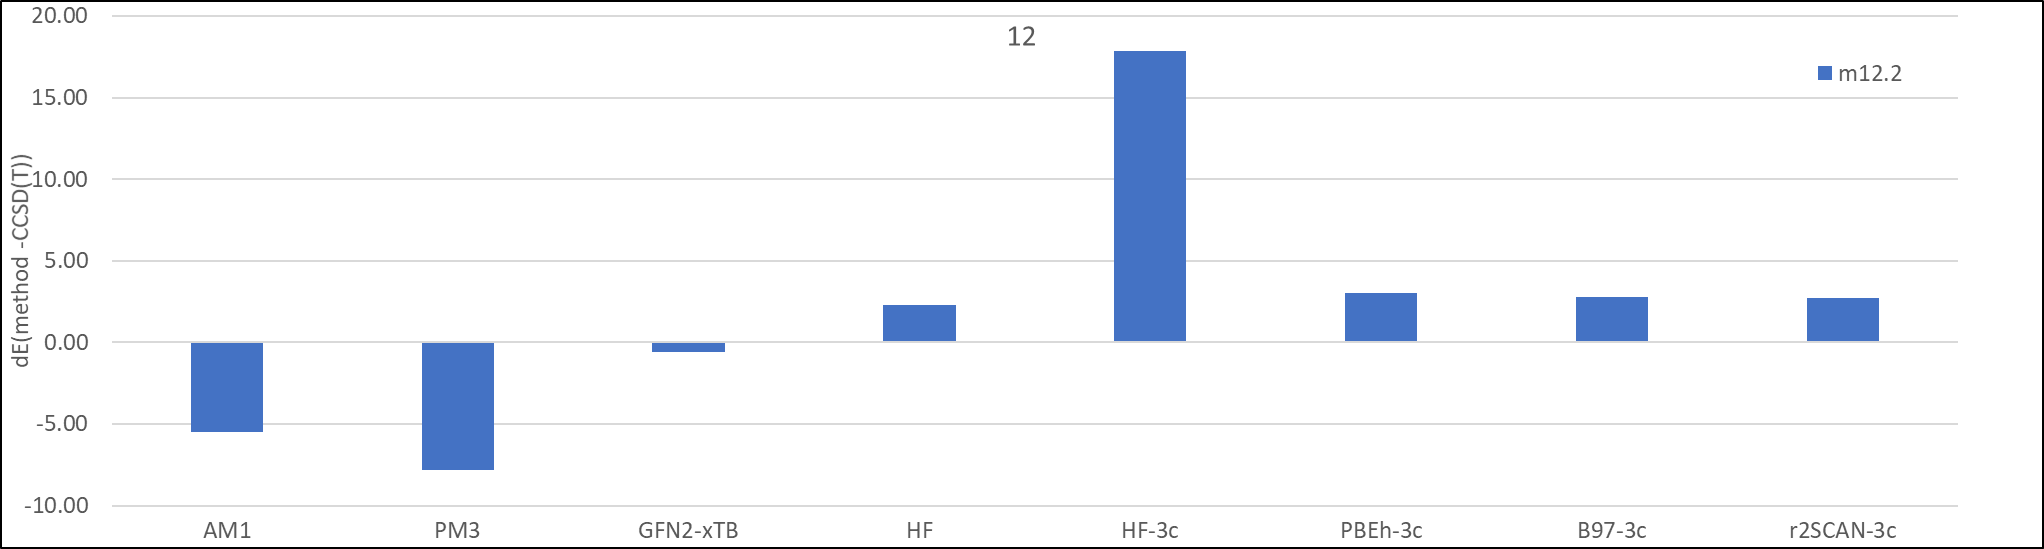


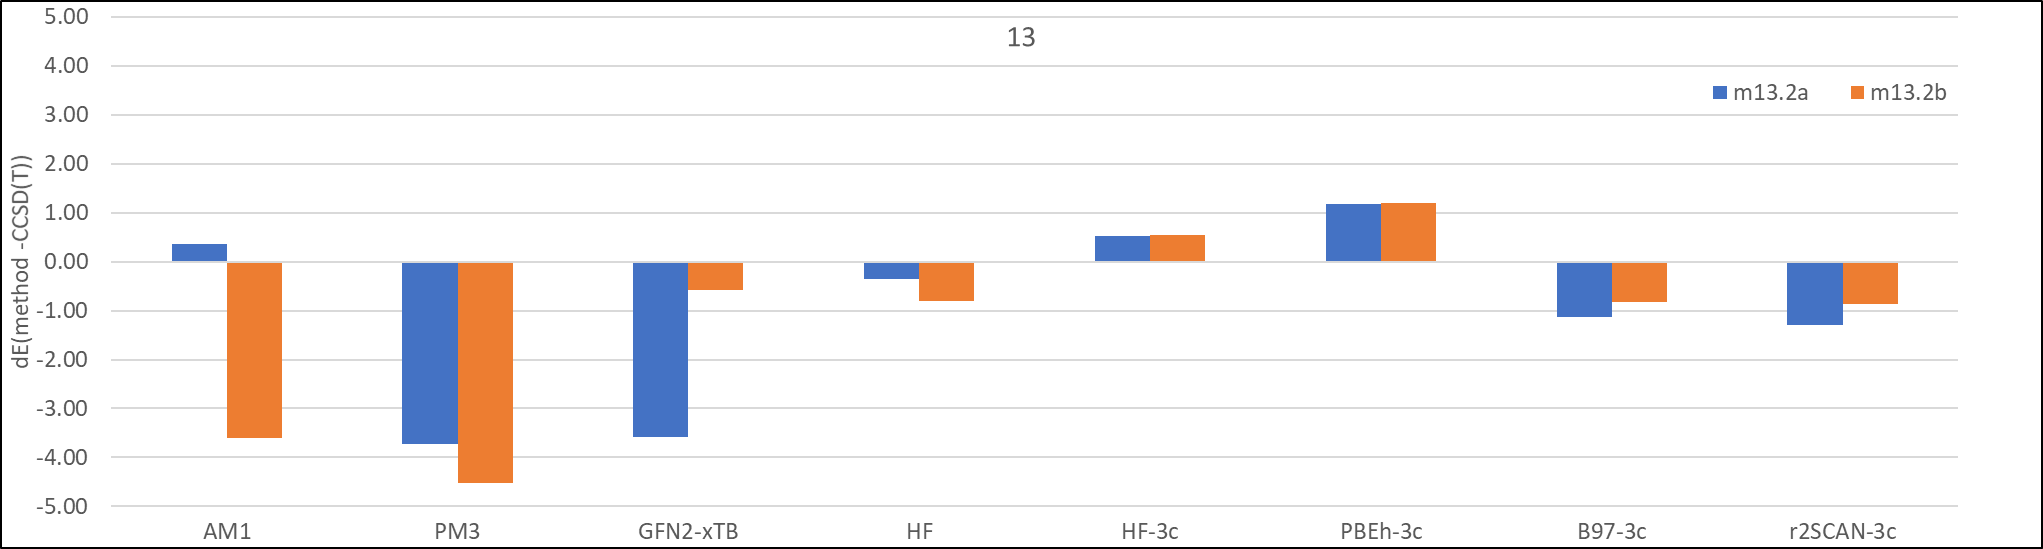


Figure S7: Tautomer state energy differences in kcal/mol relative to CCSD(T) energy differences for each state for various low-cost quantum-mechanics, semiempirical and DFT methods for calculations in solvent water. (Note that y-axis scales are different for the plots).


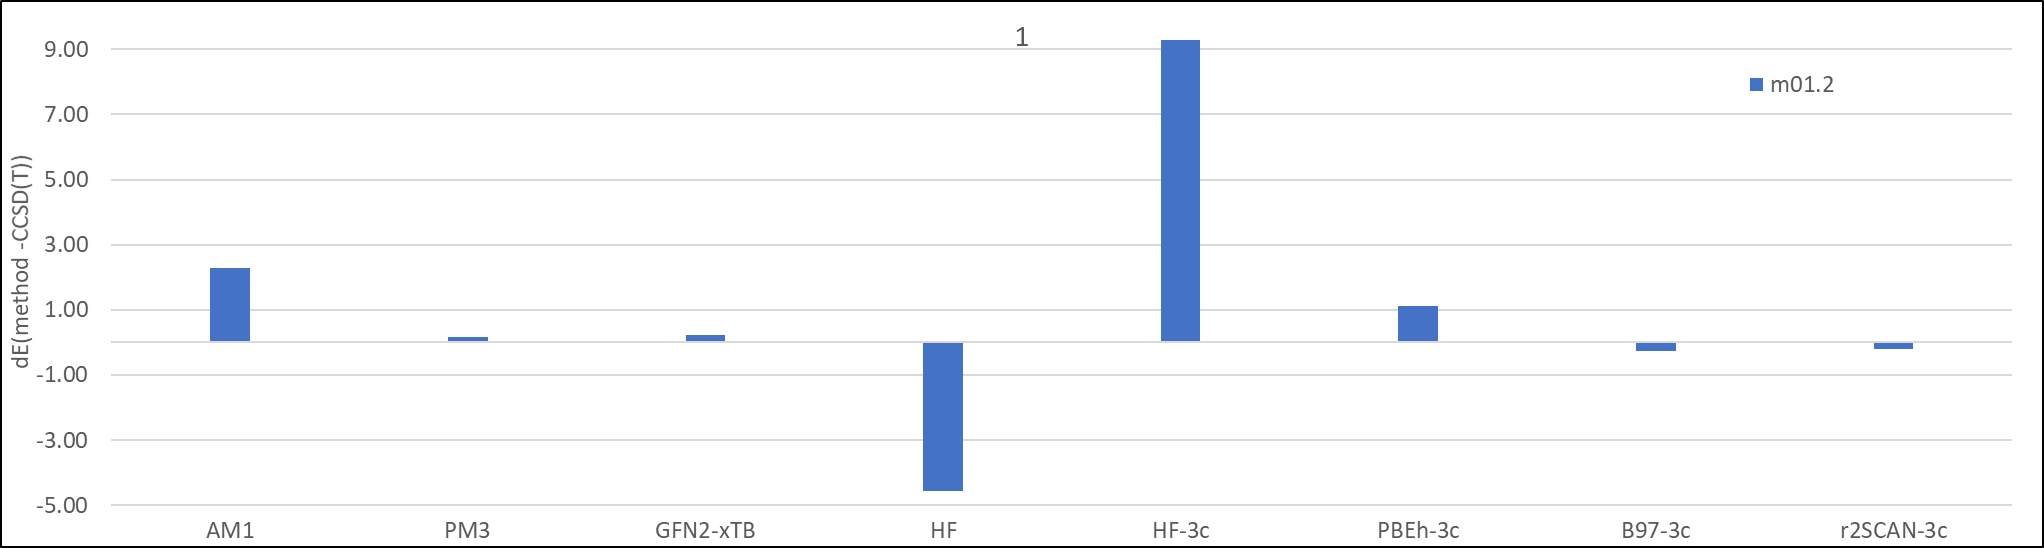


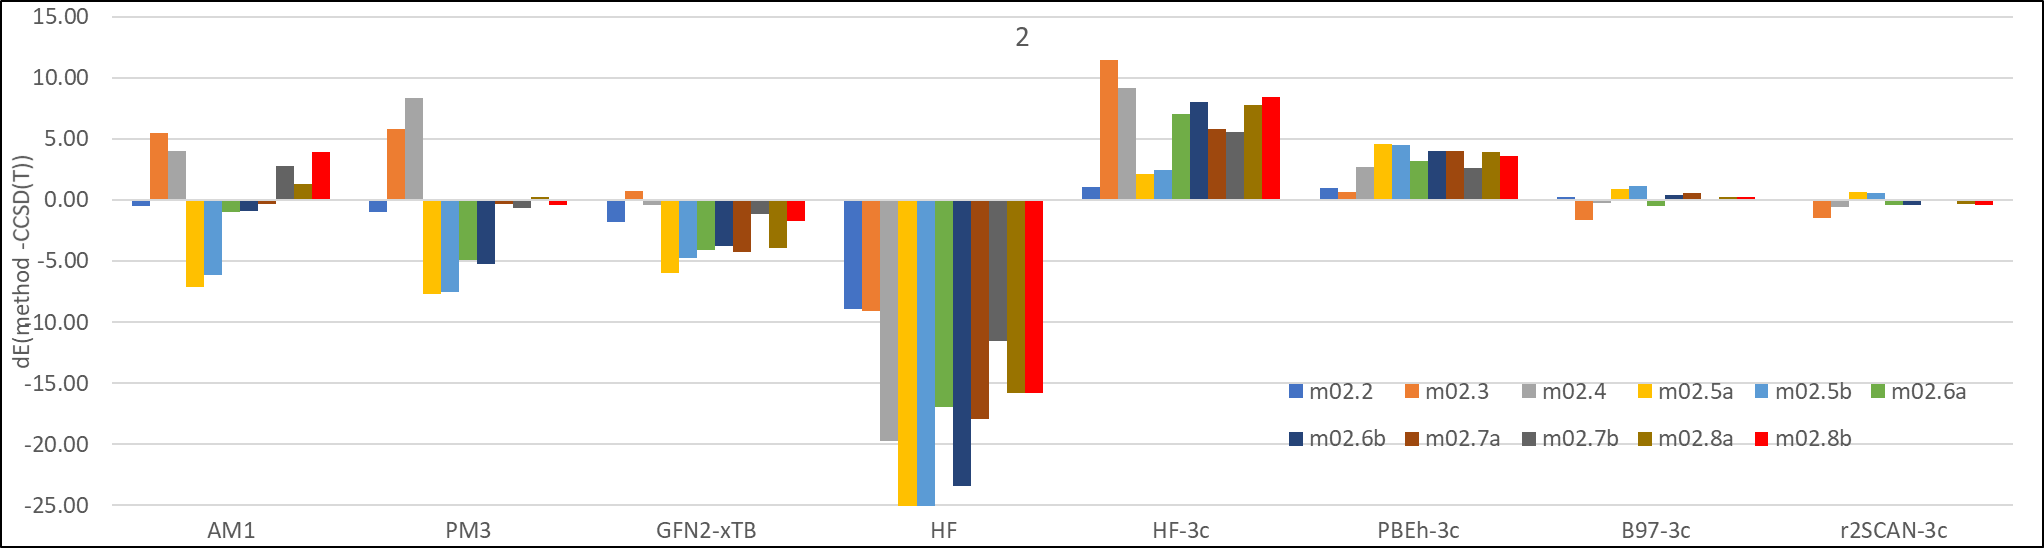


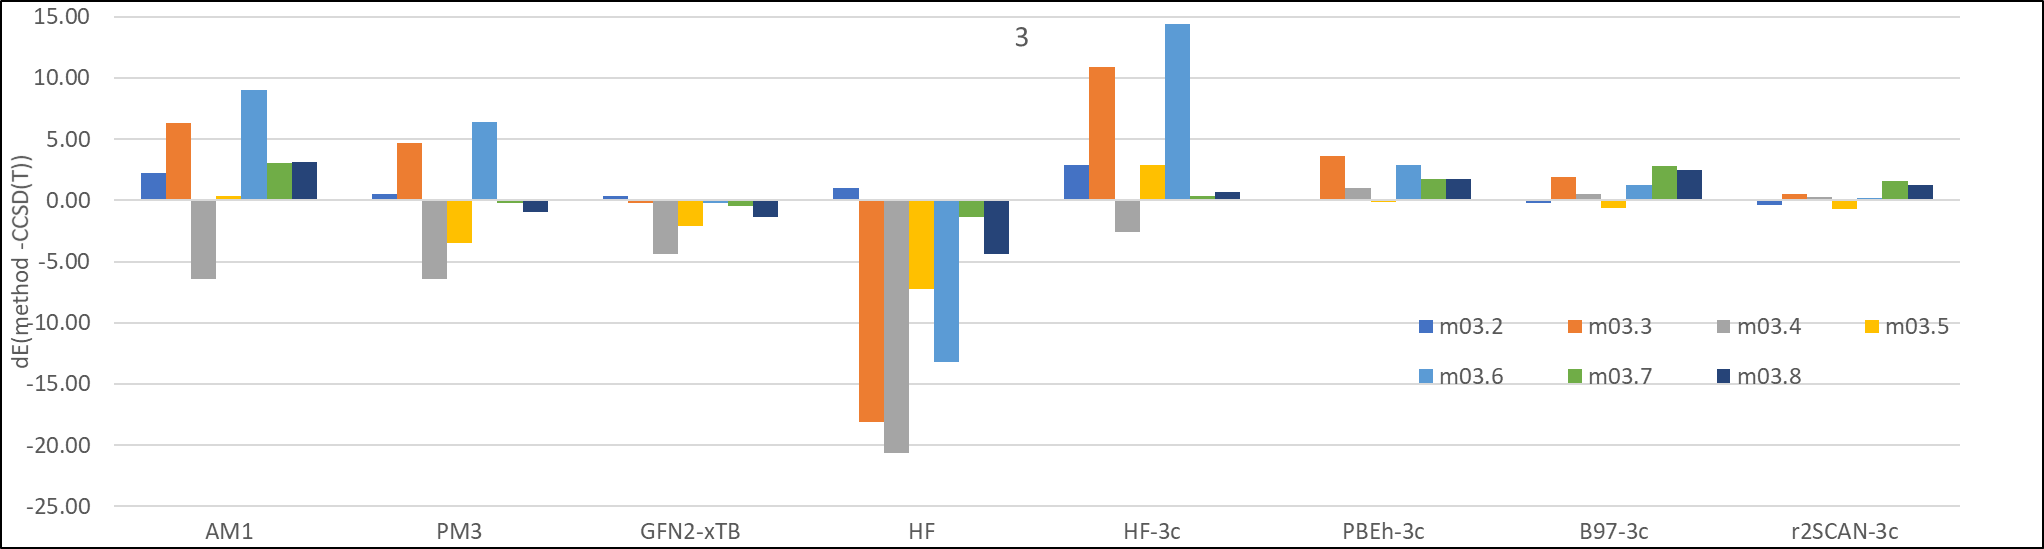


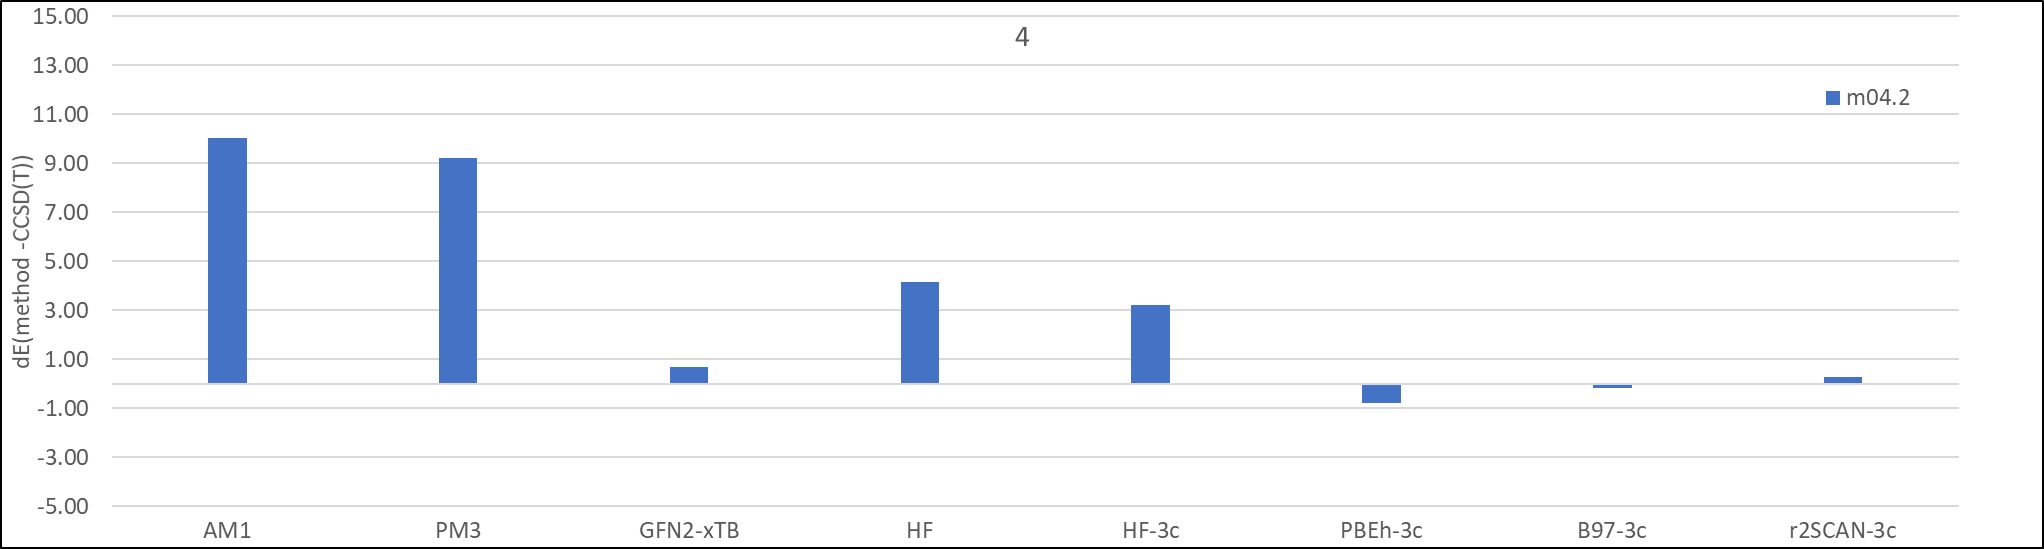


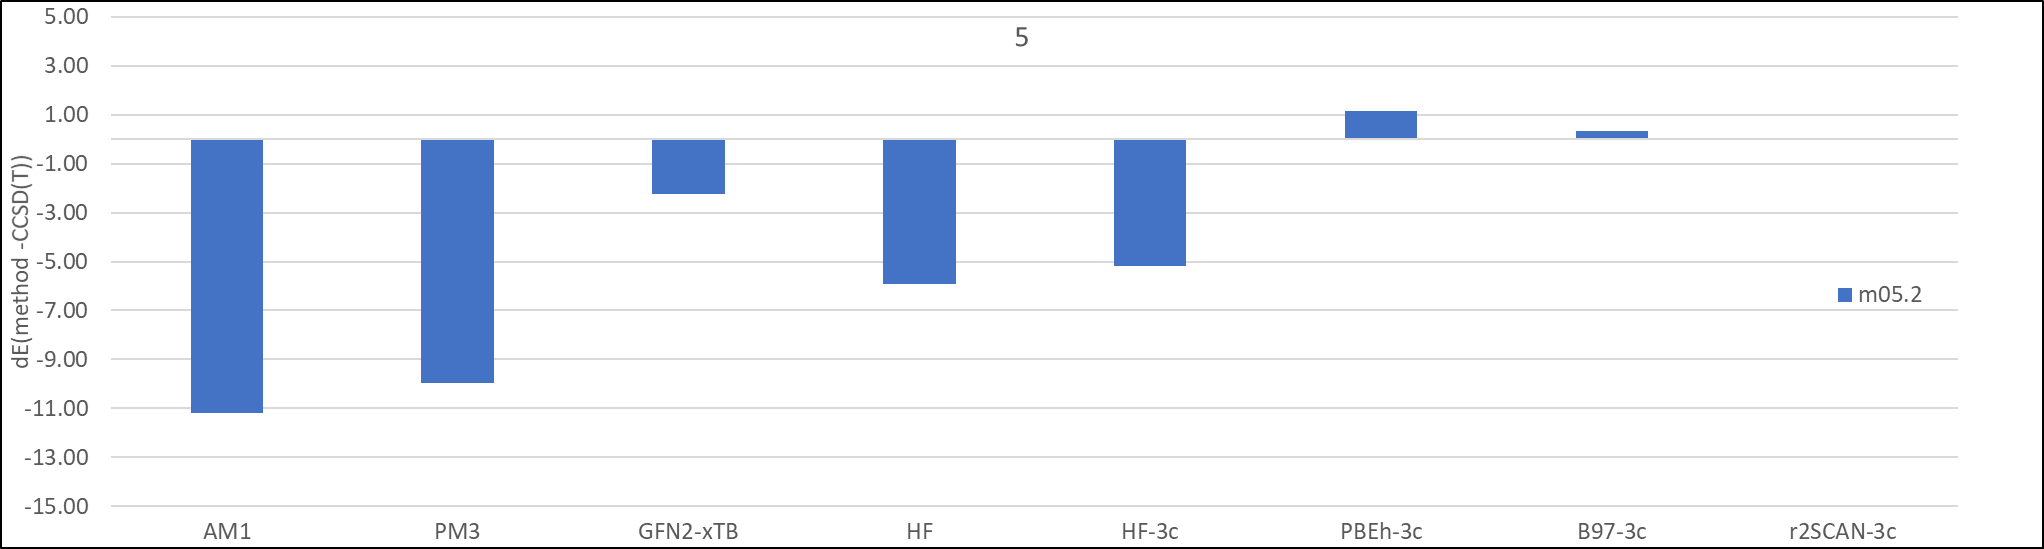


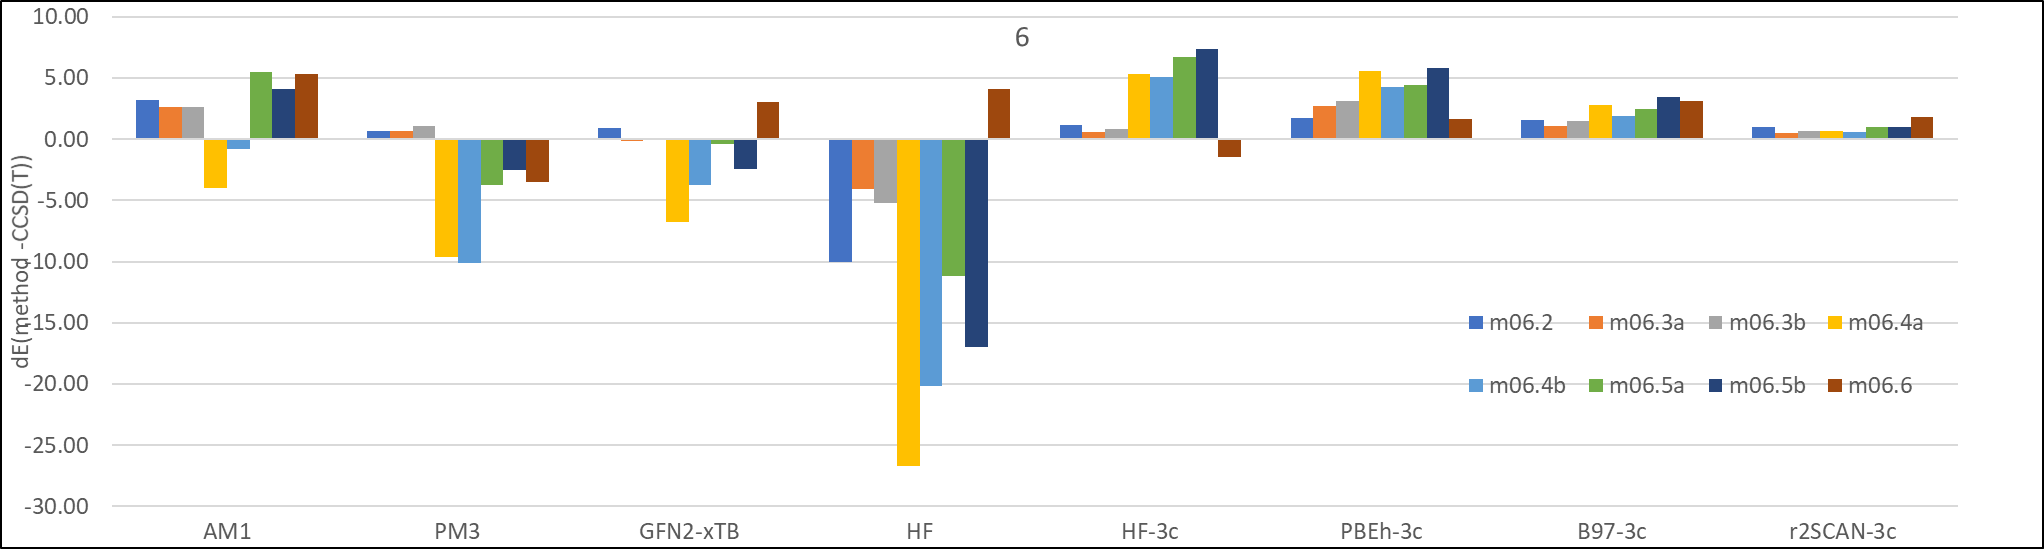


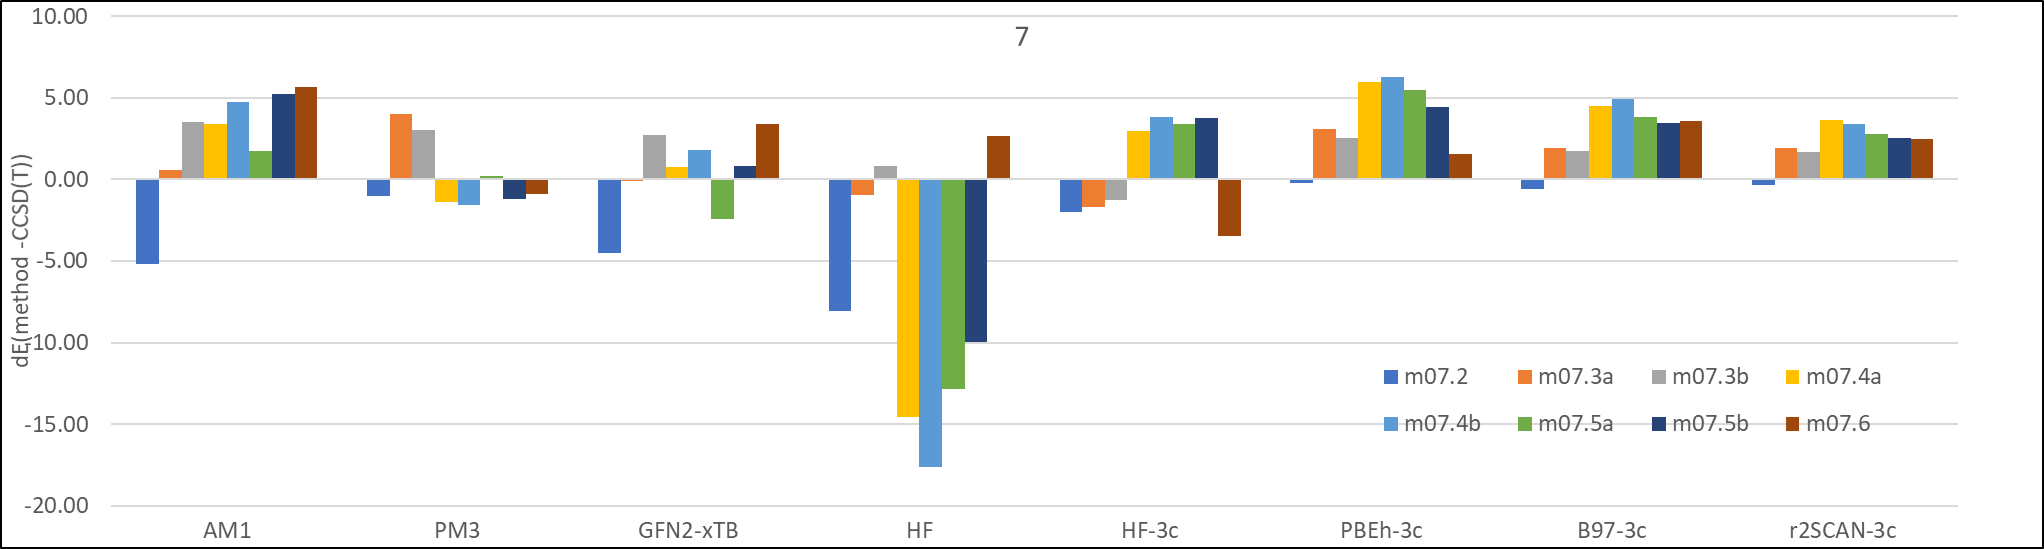


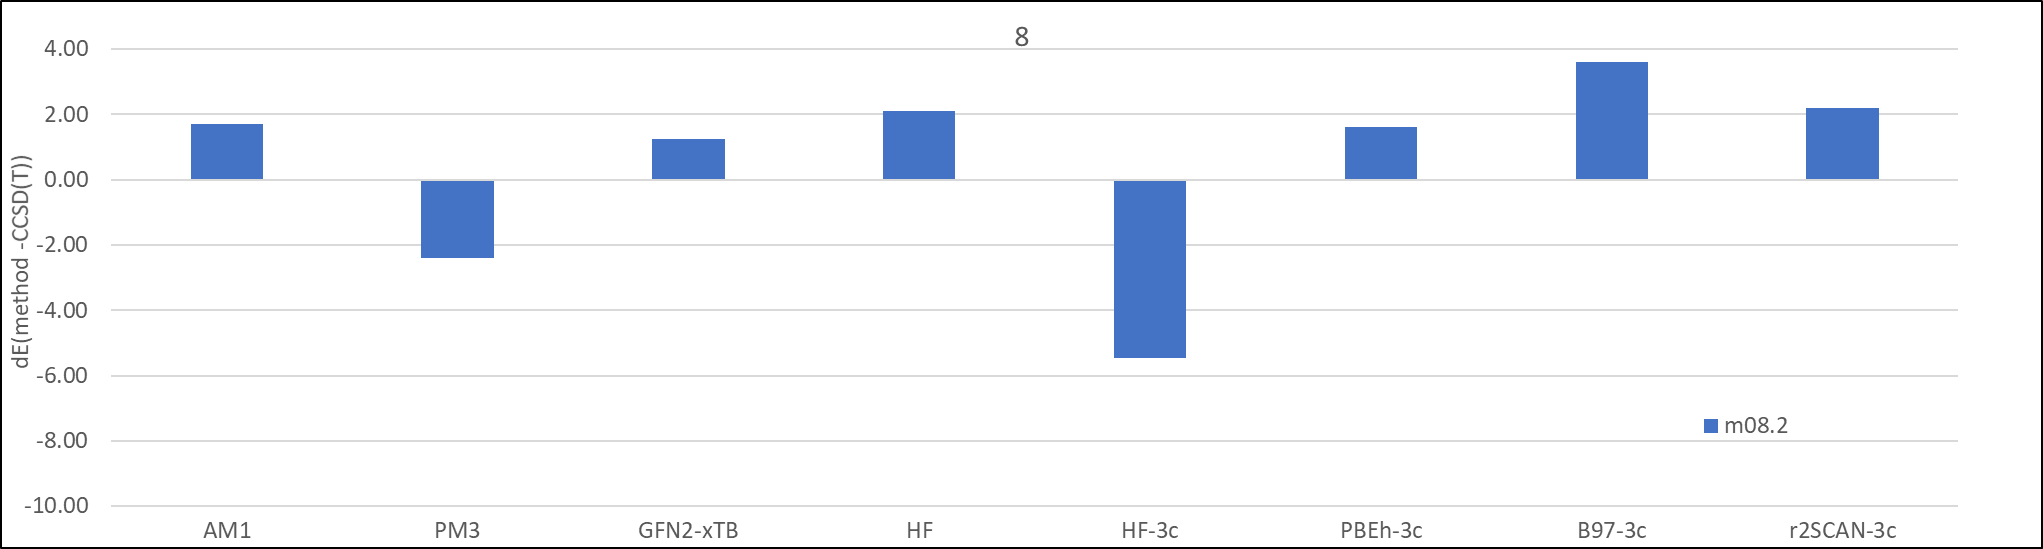


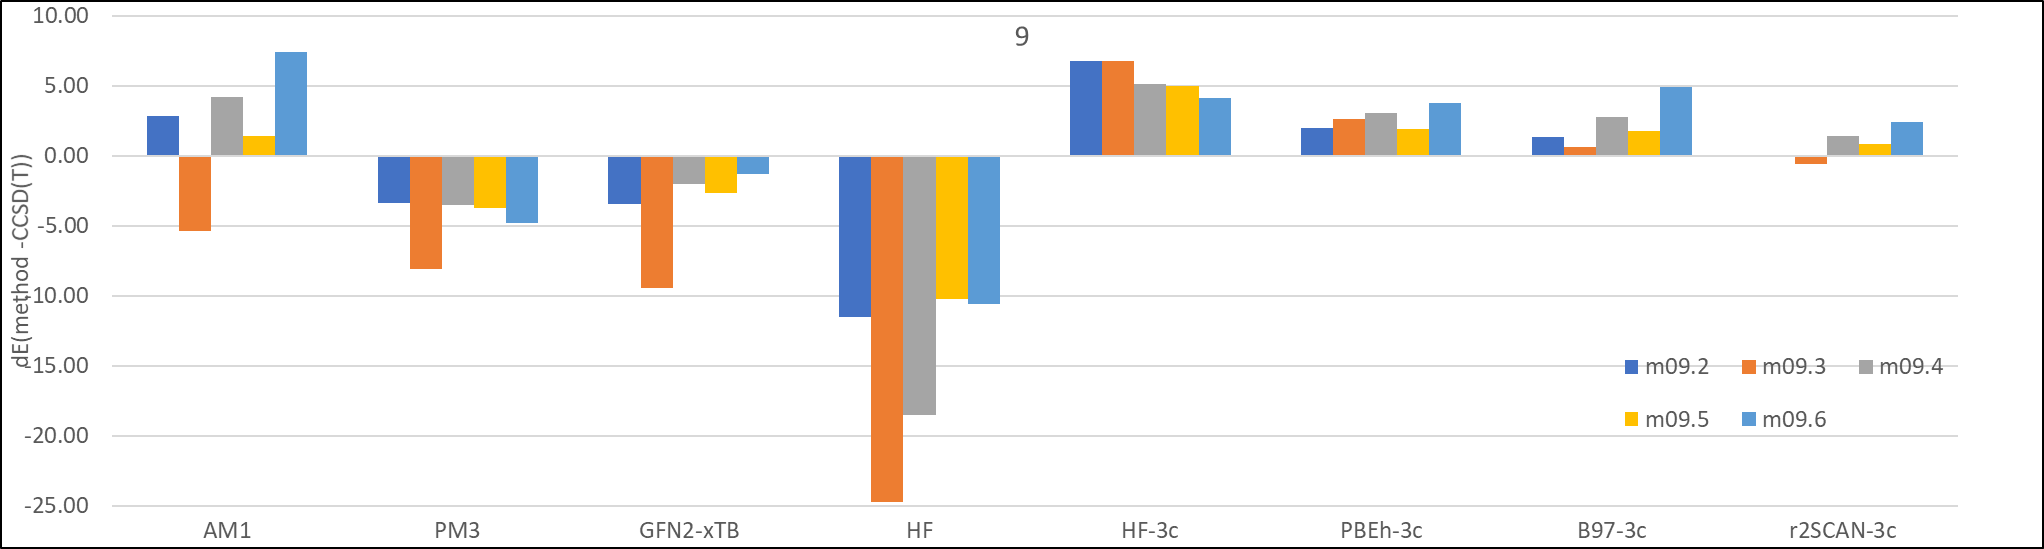


Figure S8: Tautomer state energy differences in kcal/mol relative to CCSD(T) energy differences for each state for various low-cost quantum-mechanics, semiempirical and DFT methods for calculations in gas-phase. (Note that y-axis scales are different for the plots).

|  | | Tautomer energy deltas | | | | Deltas to experiment | | | |
| --- | --- | --- | --- | --- | --- | --- | --- | --- | --- |
| pair | dE (exp) kcal/mol | M06-2X /Q | M06-2X /T | r2SCAN-3c | CCSD(T) /Q | M06-2X /Q | M06-2X /T | r2SCAN-3c | CCSD(T) /Q |
| 1A_1B | -4.80 | -3.40 | -3.60 | -5.76 | -3.21 | 1.40 | 1.20 | -0.96 | 1.59 |
| 2A_2B | -6.10 | -6.38 | -6.55 | -7.96 | -5.92 | -0.28 | -0.45 | -1.86 | 0.18 |
| 3A_3B | -7.20 | -7.63 | -7.93 | -9.34 | -7.27 | -0.43 | -0.73 | -2.14 | -0.07 |
| 4A_4B | -2.30 | 0.82 | 0.63 | -2.29 | 0.99 | 3.12 | 2.93 | 0.01 | 3.29 |
| 5A_5B | -4.80 | -3.56 | -3.77 | -5.54 | -3.28 | 1.24 | 1.03 | -0.74 | 1.52 |
| 6A_6B | -9.20 | -10.81 | -11.16 | -12.28 | -10.34 | -1.61 | -1.96 | -3.08 | -1.14 |
| 7A_7B | 7.00 | 5.16 | 5.74 | 6.36 | 6.23 | -1.84 | -1.26 | -0.64 | -0.77 |
| 10B_10C | -2.90 | -1.14 | -1.22 | -3.85 | -0.83 | 1.76 | 1.68 | -0.95 | 2.07 |
| 10D_10C | -1.20 | -1.14 | -1.22 | -3.85 | -0.83 | 0.06 | -0.02 | -2.65 | 0.37 |
| 12D_12C | -1.80 | -0.10 | -0.12 | -2.71 | 0.08 | 1.70 | 1.68 | -0.91 | 1.88 |
| 14D_14C | 0.30 | 1.20 | 1.00 | -0.10 | 2.65 | 0.90 | 0.70 | -0.40 | 2.35 |
| 15A_15B | 0.90 | 2.88 | 3.24 | 5.56 | 4.07 | 1.98 | 2.34 | 4.66 | 3.17 |
| 15A_15C | -1.20 | 2.87 | 3.31 | 3.82 | 5.65 | 4.07 | 4.51 | 5.02 | 6.85 |
| 15B_15C | -2.20 | -0.02 | 0.07 | -1.74 | 1.59 | 2.18 | 2.27 | 0.46 | 3.79 |

Table T1: Calculated energy differences for the SAMPL2 subset compounds with four methods selected and deltas between experimental and calculated energy differences in kcal/mol. Q denotes def2-QZVPP and T denotes def2-TZVP basis sets, respectively.

|  | Tautomer energy deltas | | | | Absolute energy delta to CCSD(T) | | |
| --- | --- | --- | --- | --- | --- | --- | --- |
| pair | M06-2X /Q | M06-2X /T | r2SCAN-3c | CCSD(T) /Q | M06-2X /Q | M06-2X  /T | r2SCAN-3c |
| 1A_1B | 2.68 | 2.34 | -0.11 | 2.10 | 0.57 | 0.24 | 2.21 |
| 2A_2B | -1.96 | -2.28 | -3.82 | -2.14 | 0.18 | 0.14 | 1.68 |
| 3A_3B | -3.64 | -4.04 | -5.62 | -3.92 | 0.28 | 0.12 | 1.70 |
| 4A_4B | **9.08** | 8.74 | 5.16 | 8.94 | 0.13 | 0.20 | 3.79 |
| 5A_5B | 1.13 | 0.78 | -1.35 | 0.68 | 0.46 | 0.11 | 2.03 |
| 6A_6B | -10.48 | -10.98 | -12.37 | -10.45 | 0.03 | 0.52 | 1.92 |
| 7A_7B | 10.21 | 11.06 | 11.46 | 11.16 | 0.94 | 0.09 | 0.30 |
| 10B_10C | 5.41 | 5.15 | 2.34 | 5.17 | 0.25 | 0.02 | 2.83 |
| 10D_10C | 5.41 | 5.15 | 2.34 | 5.17 | 0.25 | 0.02 | 2.83 |
| 12D_12C | 8.03 | 7.82 | 5.11 | 7.72 | 0.32 | 0.10 | 2.61 |
| 14D_14C | 4.99 | 4.63 | 3.48 | 6.26 | 1.26 | 1.62 | 2.78 |
| 15A_15B | 1.85 | 2.43 | 5.07 | 3.52 | 1.67 | 1.08 | 1.56 |
| 15A_15C | 7.75 | 8.43 | 8.81 | 10.85 | **3.11** | **2.42** | 2.04 |
| 15B_15C | 5.90 | 6.00 | 3.74 | 7.34 | 1.44 | 1.34 | **3.60** |
| **mean** |  |  |  |  | **0.8** | **0.6** | **2.3** |
| **median** |  |  |  |  | **0.4** | **0.2** | **2.1** |
| **max** |  |  |  |  | **3.1** | **2.4** | **3.8** |
| **min** |  |  |  |  | **0.0** | **0.0** | **0.3** |

Table T1: Calculated gas-phase tautomer energy differences for the SAMPL2 subset compounds with four methods selected and deltas between CCSD(T) and respective method’s tautomer energy deltas in kcal/mol. Q denotes def2-QZVPP and T denotes def2-TZVP basis sets.
